# Supplementary material for: New cytotoxic natural products from the marine sponge-derived fungus Pestalotiopsis sp. by epigenetic modification
Source: PubMed Central journal article supplement — RSC Adv. 2020 Oct 14;10(62):37982–8. doi: 10.1039/d0ra06983c (PMC9057218; doi:10.1039/d0ra06983c), 2020-10-14
Supplement: RA-010-D0RA06983C-s001.pdf [file RA-010-D0RA06983C-s001.pdf]

## Supporting Information

### **New Cytotoxic Natural Products from the Marine Sponge-Derived Fungus *Pestalotiopsis* sp. by Epigenetic**

#### **Modification**

Hui Lei <sup>1</sup>, Dan Zhang <sup>1</sup>, Nan Ding<sup>3</sup>, Siwei Chen <sup>1</sup>, Can Song <sup>1</sup>, Yu Luo <sup>1</sup>, Xiujuan Fu <sup>1</sup>, Xiaoxu Bi <sup>2\*</sup>, and Hong Niu <sup>1\*</sup>

<sup>1</sup> School of Pharmacy, Southwest Medical University, Luzhou, Sichuan 646000, China;

<sup>2</sup> College of Agriculture and Life Sciences, Kunming University, Kunming, Yunnan 650241, China;

<sup>3</sup> Institute of Pathogenic Biology, University of South China, Hengyang 421001, China;

\*To whom correspondence should be addressed.

Tel/fax: +86-0830-316 2291. E-mail: dawn@nwsuaf.edu.cn

Figure S1. HRESI-MS spectrum of the new compound **1**

Figure S2.  $^1\text{H}$  NMR (600 MHz,  $\text{CD}_3\text{OD}$ ) spectrum of the new compound **1**

Figure S3.  $^{13}\text{C}$  NMR (150 MHz,  $\text{CD}_3\text{OD}$ ) spectrum of the new compound **1**

Figure S4. HSQC spectrum of the new compound **1**

Figure S5. HMBC spectrum of the new compound **1**

Figure S6. COSY spectrum of the new compound **1**

Figure S7. NOESY spectrum of the new compound **1**

Figure S8. HRESI-MS spectrum of the new compound **2**

Figure S9.  $^1\text{H}$  NMR (600 MHz,  $\text{CD}_3\text{OD}$ ) spectrum of the new compound **2**

Figure S10.  $^{13}\text{C}$  NMR (150 MHz,  $\text{CD}_3\text{OD}$ ) spectrum of the new compound **2**

Figure S11. HSQC spectrum of the new compound **2**

Figure S12. HMBC spectrum of the new compound **2**

Figure S13. COSY spectrum of the new compound **2**

Figure S14. NOESY spectrum of the new compound **2**

Figure S15. HRESI-MS spectrum of the new compound **3/11**

Figure S16.  $^1\text{H}$  NMR (600 MHz,  $\text{CD}_3\text{OD}$ ) spectrum of the new compound **3/11**

Figure S17.  $^{13}\text{C}$  NMR (150 MHz,  $\text{CD}_3\text{OD}$ ) spectrum of the new compound **3/11**

Figure S18. Enlarged-1  $^{13}\text{C}$  NMR (150 MHz,  $\text{CD}_3\text{OD}$ ) spectrum of the new compound **3/11**

Figure S19. Enlarged-2  $^{13}\text{C}$  NMR (150 MHz,  $\text{CD}_3\text{OD}$ ) spectrum of the new compound **3/11**

Figure S20. HSQC spectrum of the new compound **3/11**

Figure S21. HMBC spectrum of the new compound **3/11**

Figure S22. COSY spectrum of the new compound **3/11**

Figure S23. NOESY spectrum of the new compound **3/11**

Figure S24. HRESI-MS spectrum of the new compound **4**

Figure S25.  $^1\text{H}$  NMR (600 MHz,  $\text{CD}_3\text{OD}$ ) spectrum of the new compound **4**

Figure S26.  $^{13}\text{C}$  NMR (150 MHz,  $\text{CD}_3\text{OD}$ ) spectrum of the new compound **4**

Figure S27. HSQC spectrum of the new compound **4**

Figure S28. HMBC spectrum of the new compound **4**

Figure S29. COSY spectrum of the new compound **4**

Figure S30. NOESY spectrum of the new compound **4**

Figure S31.  $^1\text{H}$  NMR (600 MHz,  $\text{CDCl}_3$ ) spectrum of the compound **5**

Figure S32.  $^{13}\text{C}$  NMR (150 MHz,  $\text{CDCl}_3$ ) spectrum of the compound **5**

Figure S33.  $^1\text{H}$  NMR (600 MHz,  $\text{CD}_3\text{OD}$ ) spectrum of the compound **6**

Figure S34.  $^{13}\text{C}$  NMR (150 MHz,  $\text{CD}_3\text{OD}$ ) spectrum of the compound **6**

Figure S35. HSQC spectrum of the compound **6**

Figure S36. HMBC spectrum of the compound **6**

Figure S37. COSY spectrum of the compound **6**

Figure S38.  $^1\text{H}$  NMR (600 MHz,  $\text{CD}_3\text{OD}$ ) spectrum of the compound **7**

Figure S39.  $^{13}\text{C}$  NMR (150 MHz,  $\text{CD}_3\text{OD}$ ) spectrum of the compound **7**

Figure S40. HSQC spectrum of the compound **7**

Figure S41. HMBC spectrum of the compound **7**

Figure S42. COSY spectrum of the compound **7**

Figure S43. NOESY spectrum of the compound **7**

Figure S44.  $^1\text{H}$  NMR (600 MHz,  $\text{CD}_3\text{OD}$ ) spectrum of the compound **8**

Figure S45.  $^{13}\text{C}$  NMR (150 MHz,  $\text{CD}_3\text{OD}$ ) spectrum of the compound **8**

Figure S46. HSQC spectrum of the compound **8**

Figure S47. HMBC spectrum of the compound **8**

Figure S48. COSY spectrum of the compound **8**

Figure S49.  $^1\text{H}$  NMR (600 MHz,  $\text{CD}_3\text{OD}$ ) spectrum of the compound **9**

Figure S50.  $^{13}\text{C}$  NMR (150 MHz,  $\text{CD}_3\text{OD}$ ) spectrum of the compound **9**

Figure S51. HSQC spectrum of the compound **9**

Figure S52. HMBC spectrum of the compound **9**

Figure S53. COSY spectrum of the compound **9**

Figure S54. NOESY spectrum of the compound **9**

Figure S55.  $^1\text{H}$  NMR (600 MHz,  $\text{CD}_3\text{OD}$ ) spectrum of the compound **10**

Figure S56.  $^{13}\text{C}$  NMR (150 MHz,  $\text{CD}_3\text{OD}$ ) spectrum of the compound **10**

Figure S57. Chromatogram of the chiral HPLC separation of **3** and **11**.

Figure S58. Chromatogram of the HPLC separation of **2** and **7**

**Table S1.**  $^1\text{H}$  (600 MHz) and  $^{13}\text{C}$  NMR (150 MHz) data for compounds **1** and **6** in  $\text{CD}_3\text{OD}$

**Table S2.**  $^1\text{H}$  (600 MHz) and  $^{13}\text{C}$  NMR (150 MHz) data for compounds **2** and **7** in  $\text{CD}_3\text{OD}$

Figure S59. Comparison of the calculated ECD spectra for **1** with the experimental spectrum of **1** in methanol

**Table S3.** Energy analysis for conformers of **1** at B3LYP/6-31G(d) level

Figure S60. Comparison of the calculated ECD spectra for **2** with the experimental spectrum of **2** in methanol

**Table S4.** Energy analysis for conformers of **2** at B3LYP/6-31G(d) level

Figure S61. Comparison of the calculated ECD spectra for **3** with the experimental spectrum of **3** in methanol

**Table S5.** Energy analysis for conformers of **3** at B3LYP/6-31G(d) level

## Qualitative Analysis Report

|                        |                        |               |                      |
|------------------------|------------------------|---------------|----------------------|
| Data Filename          | LH-4-NEG.d             | Sample Name   |                      |
| Sample Type            | Sample                 | Position      | P1-A2                |
| Instrument Name        | Instrument 1           | User Name     |                      |
| Acq Method             | default-20191128-neg.m | Acquired Time | 7/14/2020 8:55:04 AM |
| IRM Calibration Status | Success                | DA Method     | analysis.m           |
| Comment                |                        |               |                      |

Sample Group      Info.

### User Spectra

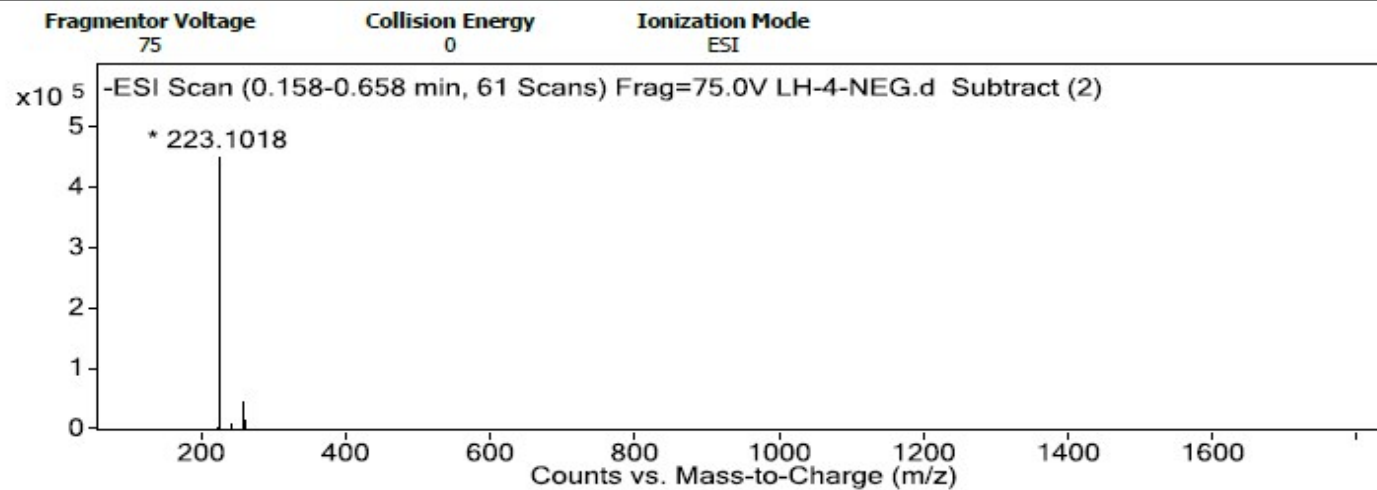

Figure S1. HRESI-MS spectrum of the new compound **1**

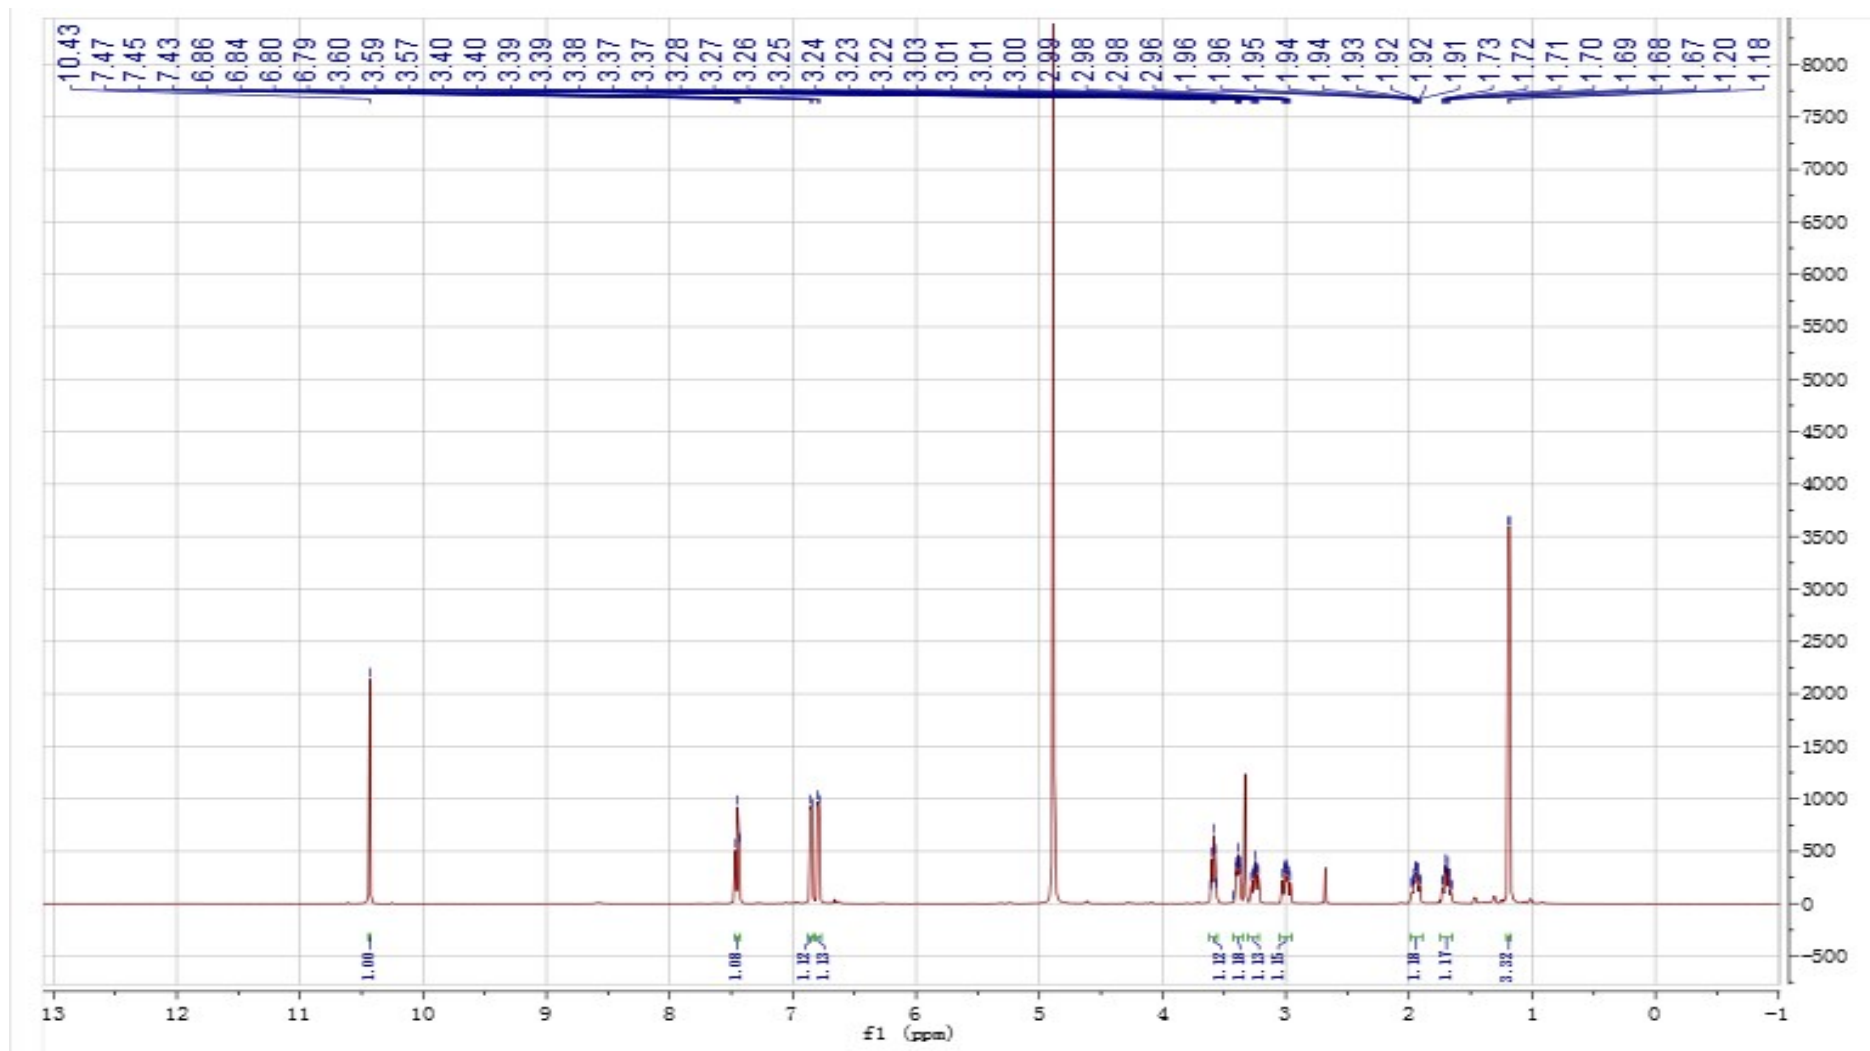

Figure S2. <sup>1</sup>H NMR (600 MHz, CD<sub>3</sub>OD) spectrum of the new compound **1**

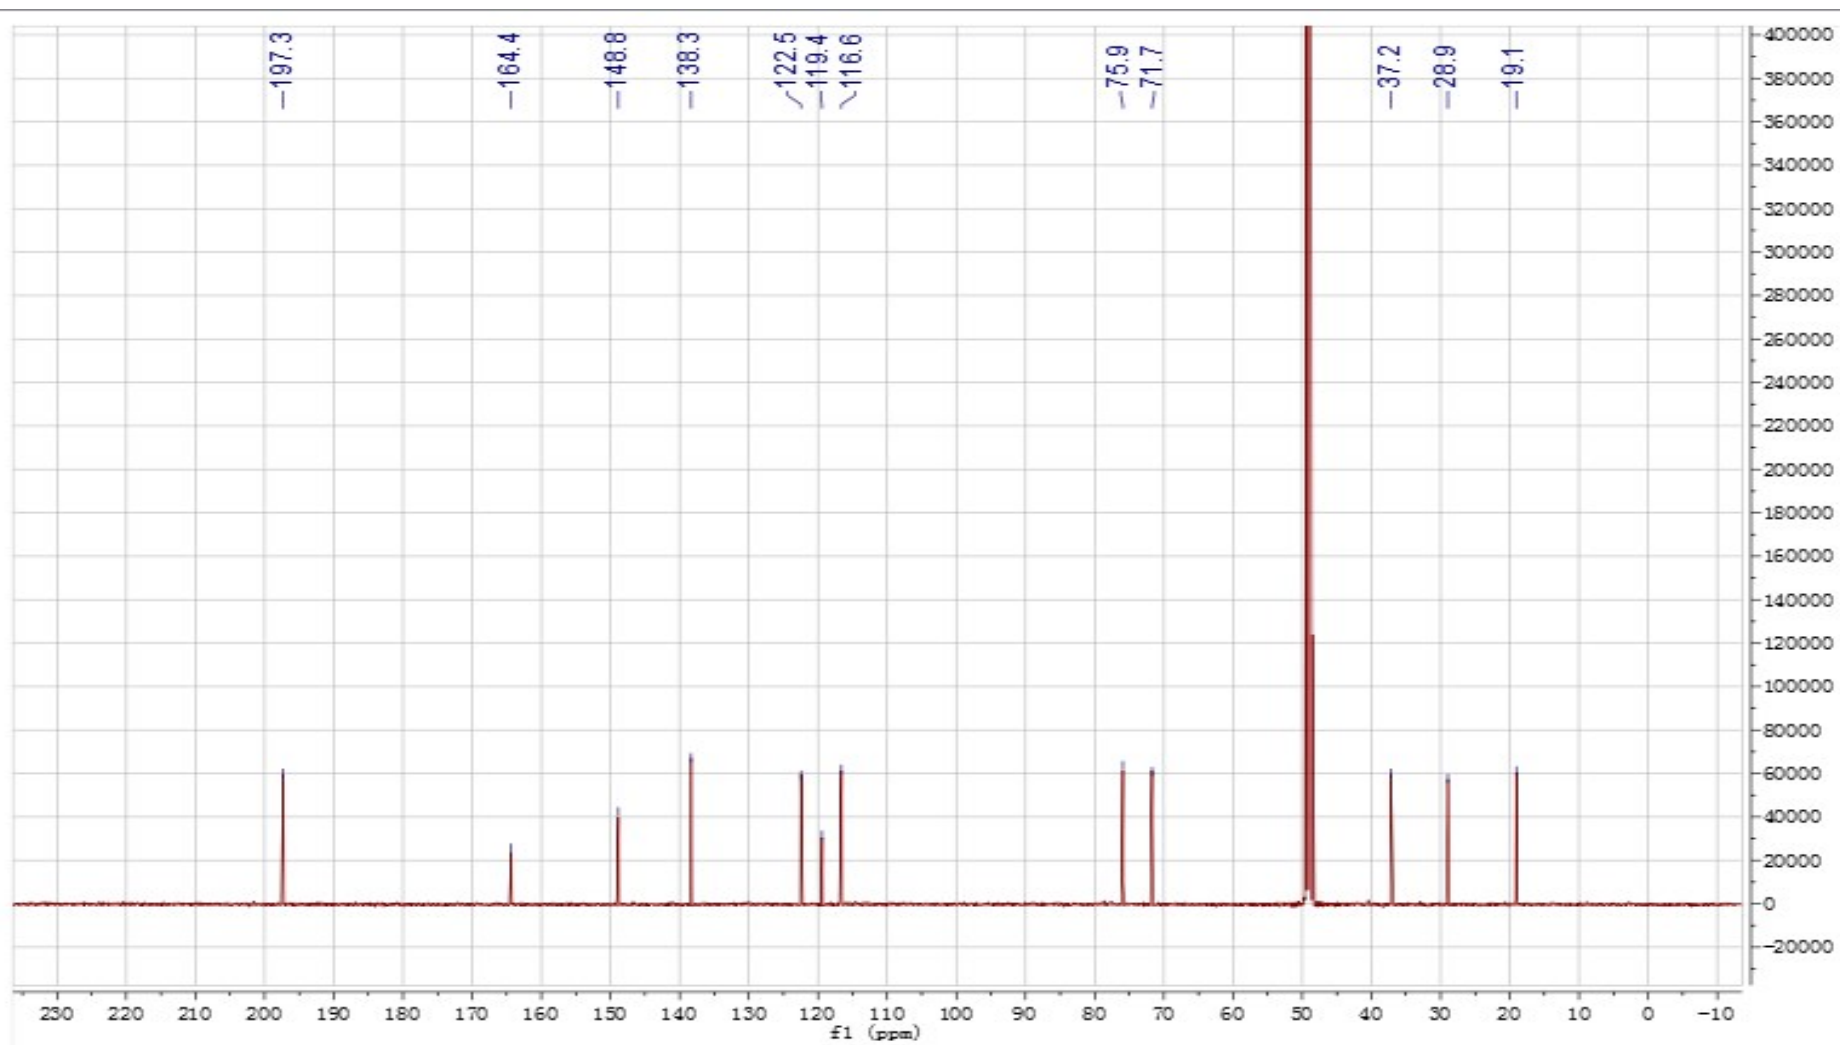

Figure S3.  $^{13}\text{C}$  NMR (150 MHz,  $\text{CD}_3\text{OD}$ ) spectrum of the new compound **1**



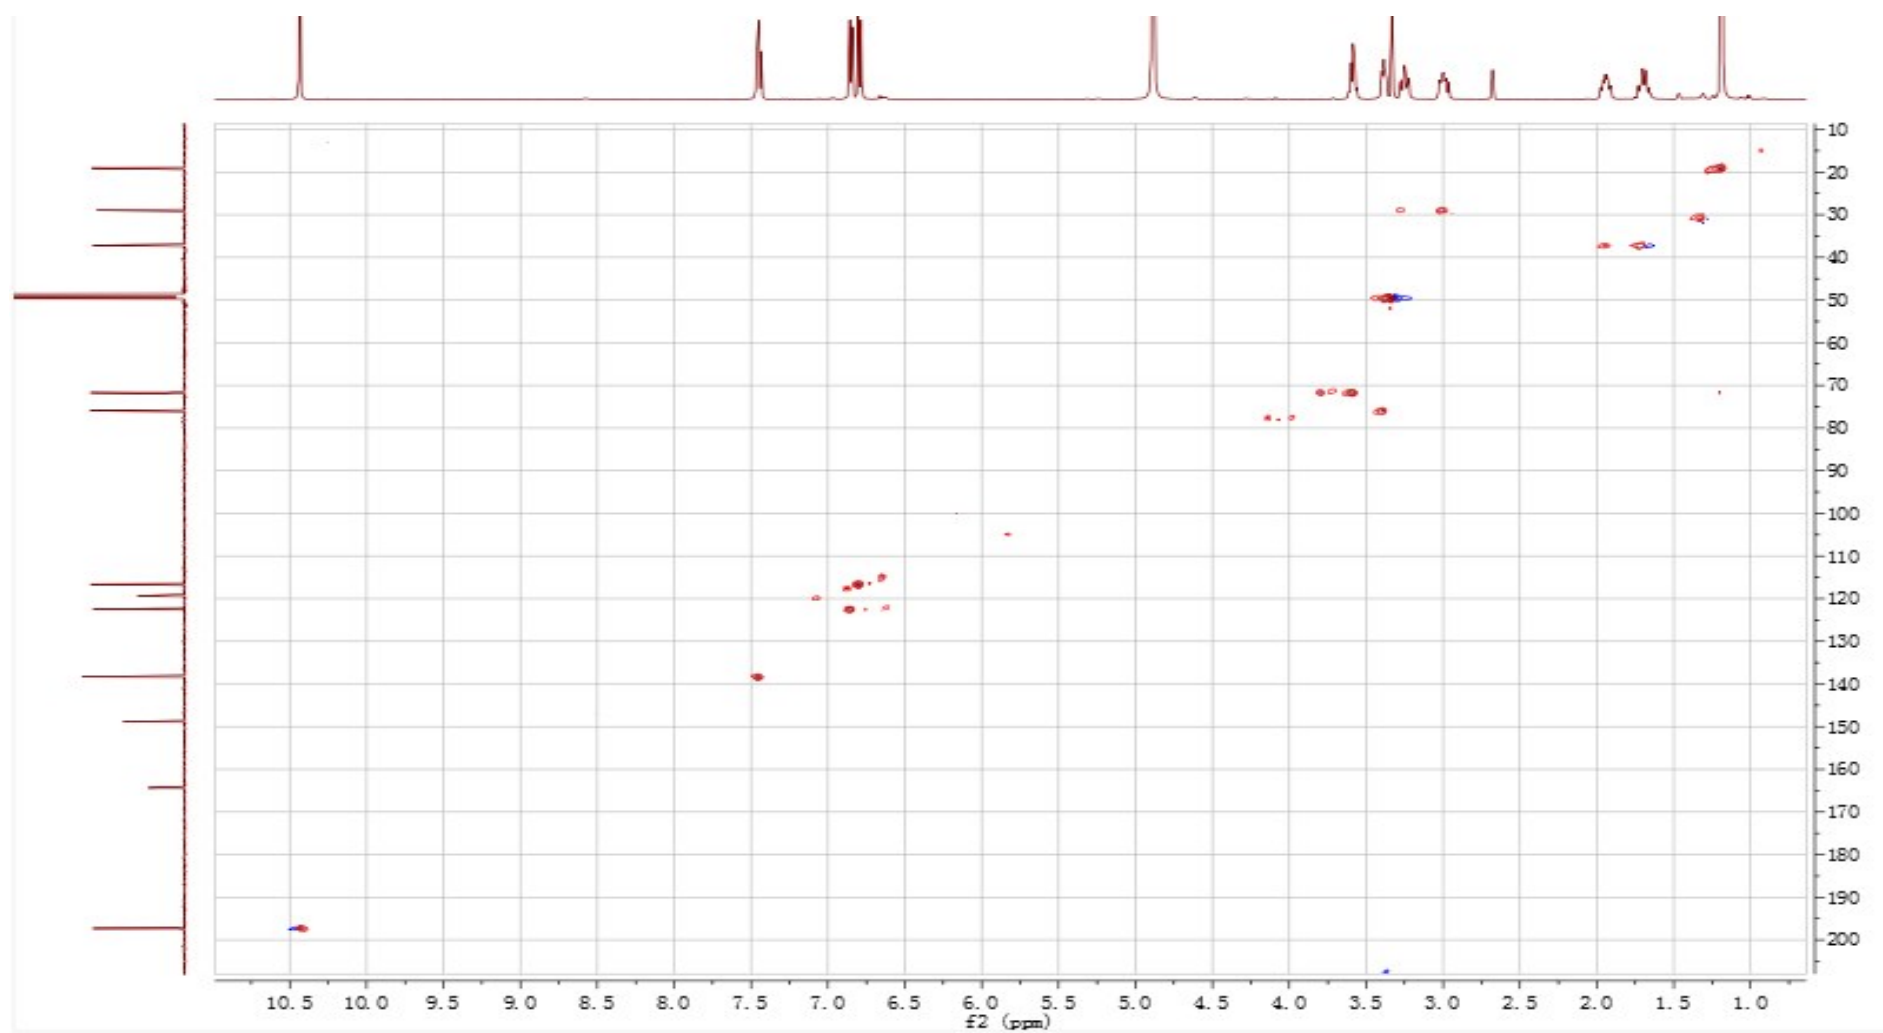

Figure S4. HSQC spectrum of the new compound **1**

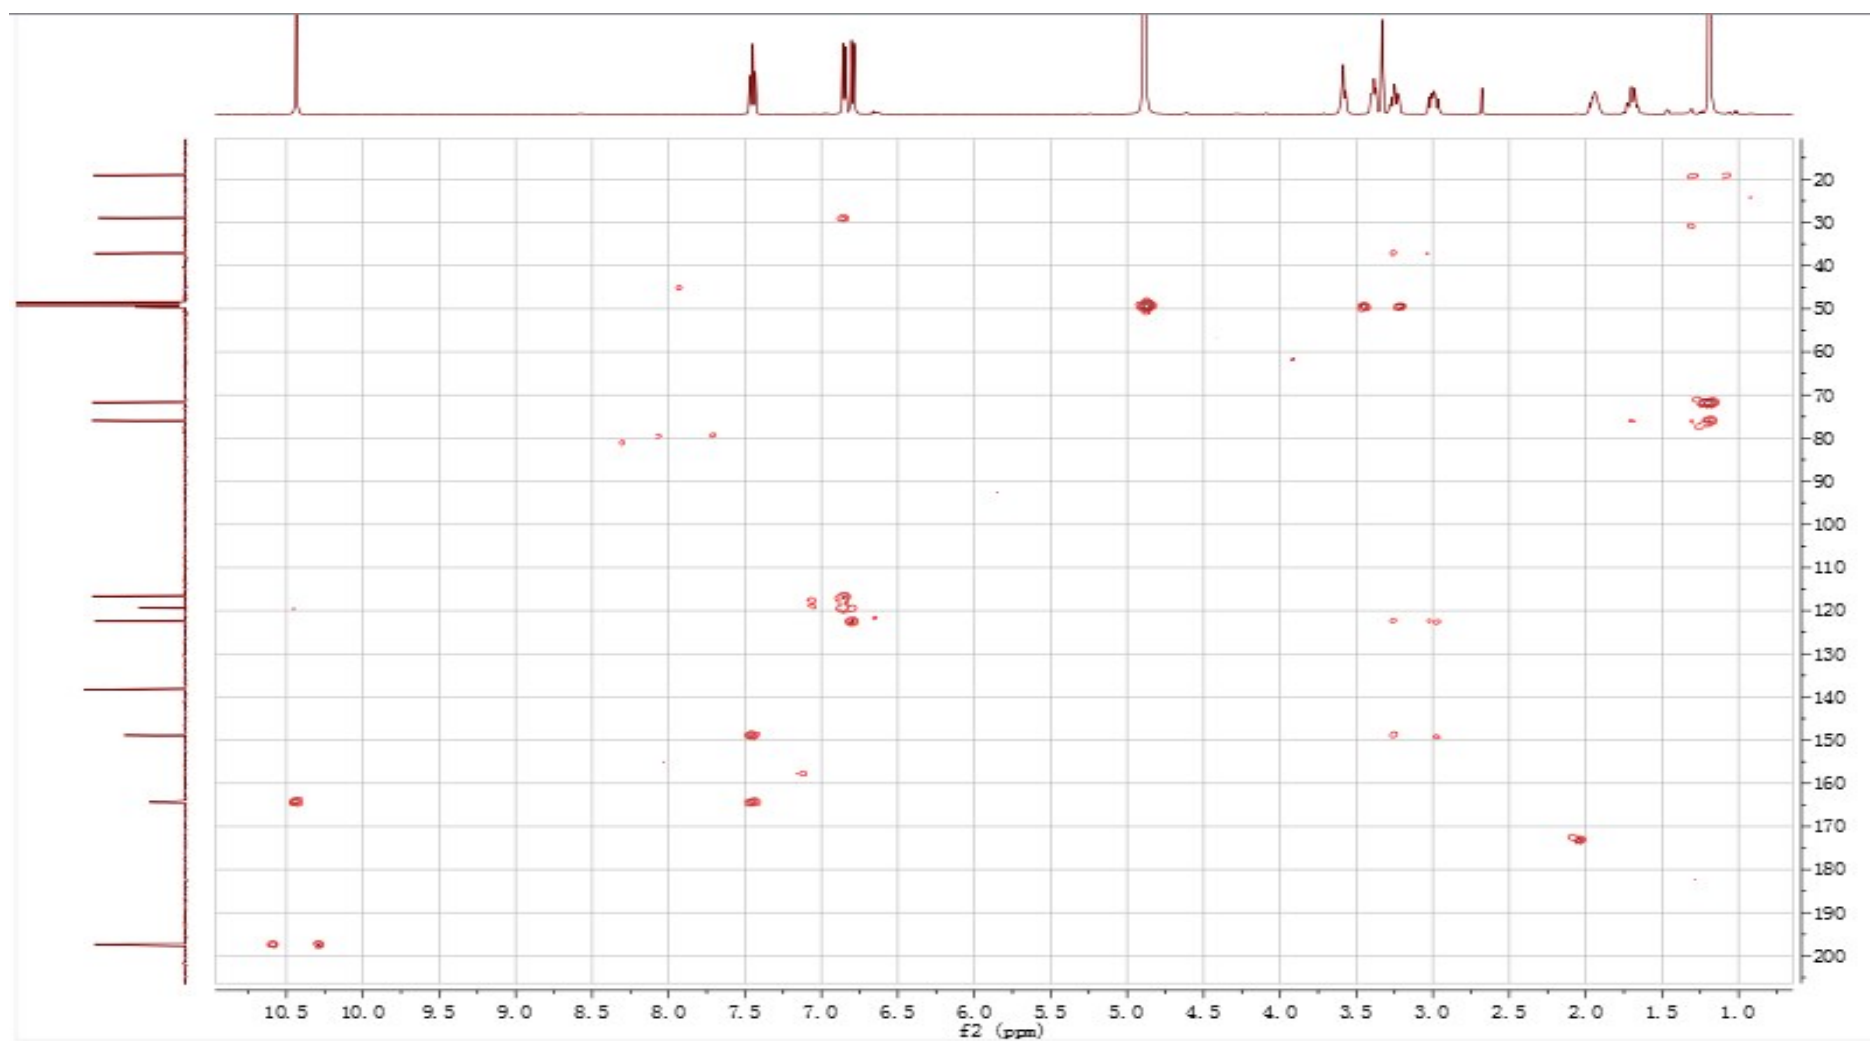

Figure S5. HMBC spectrum of the new compound **1**

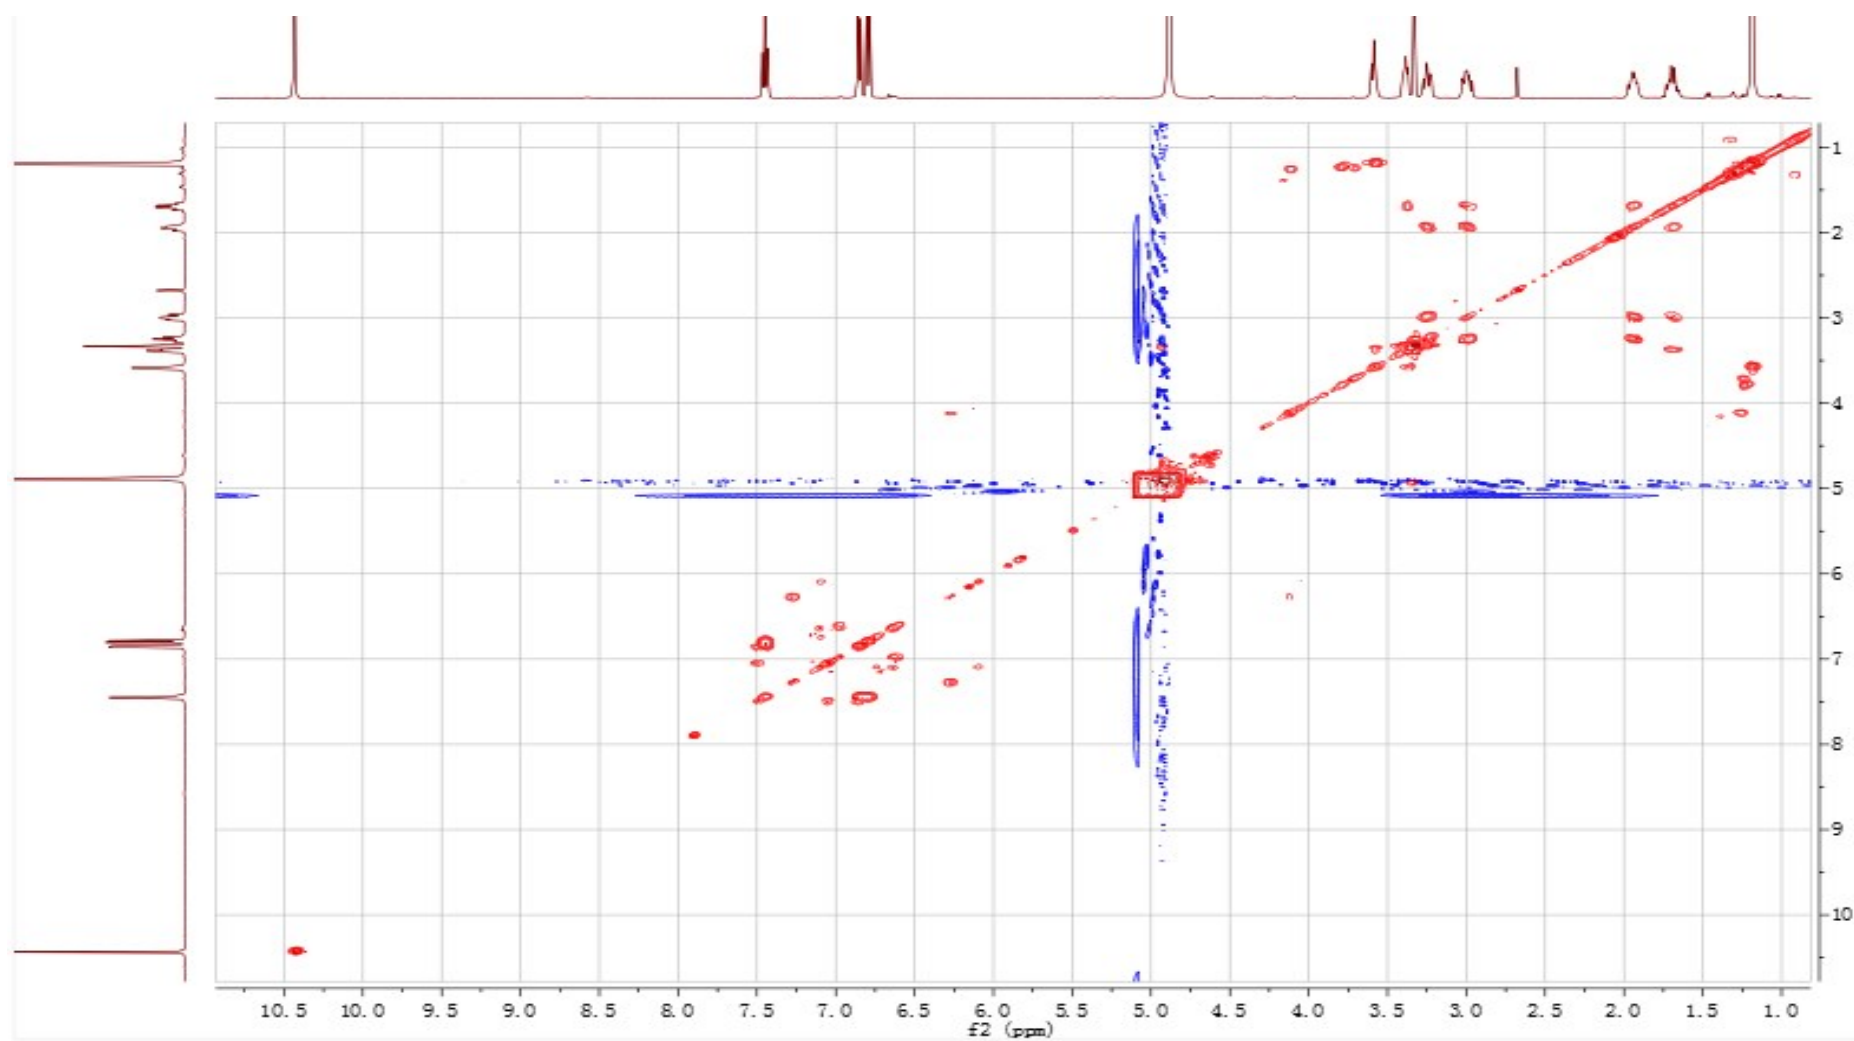

Figure S6. COSY spectrum of the new compound **1**

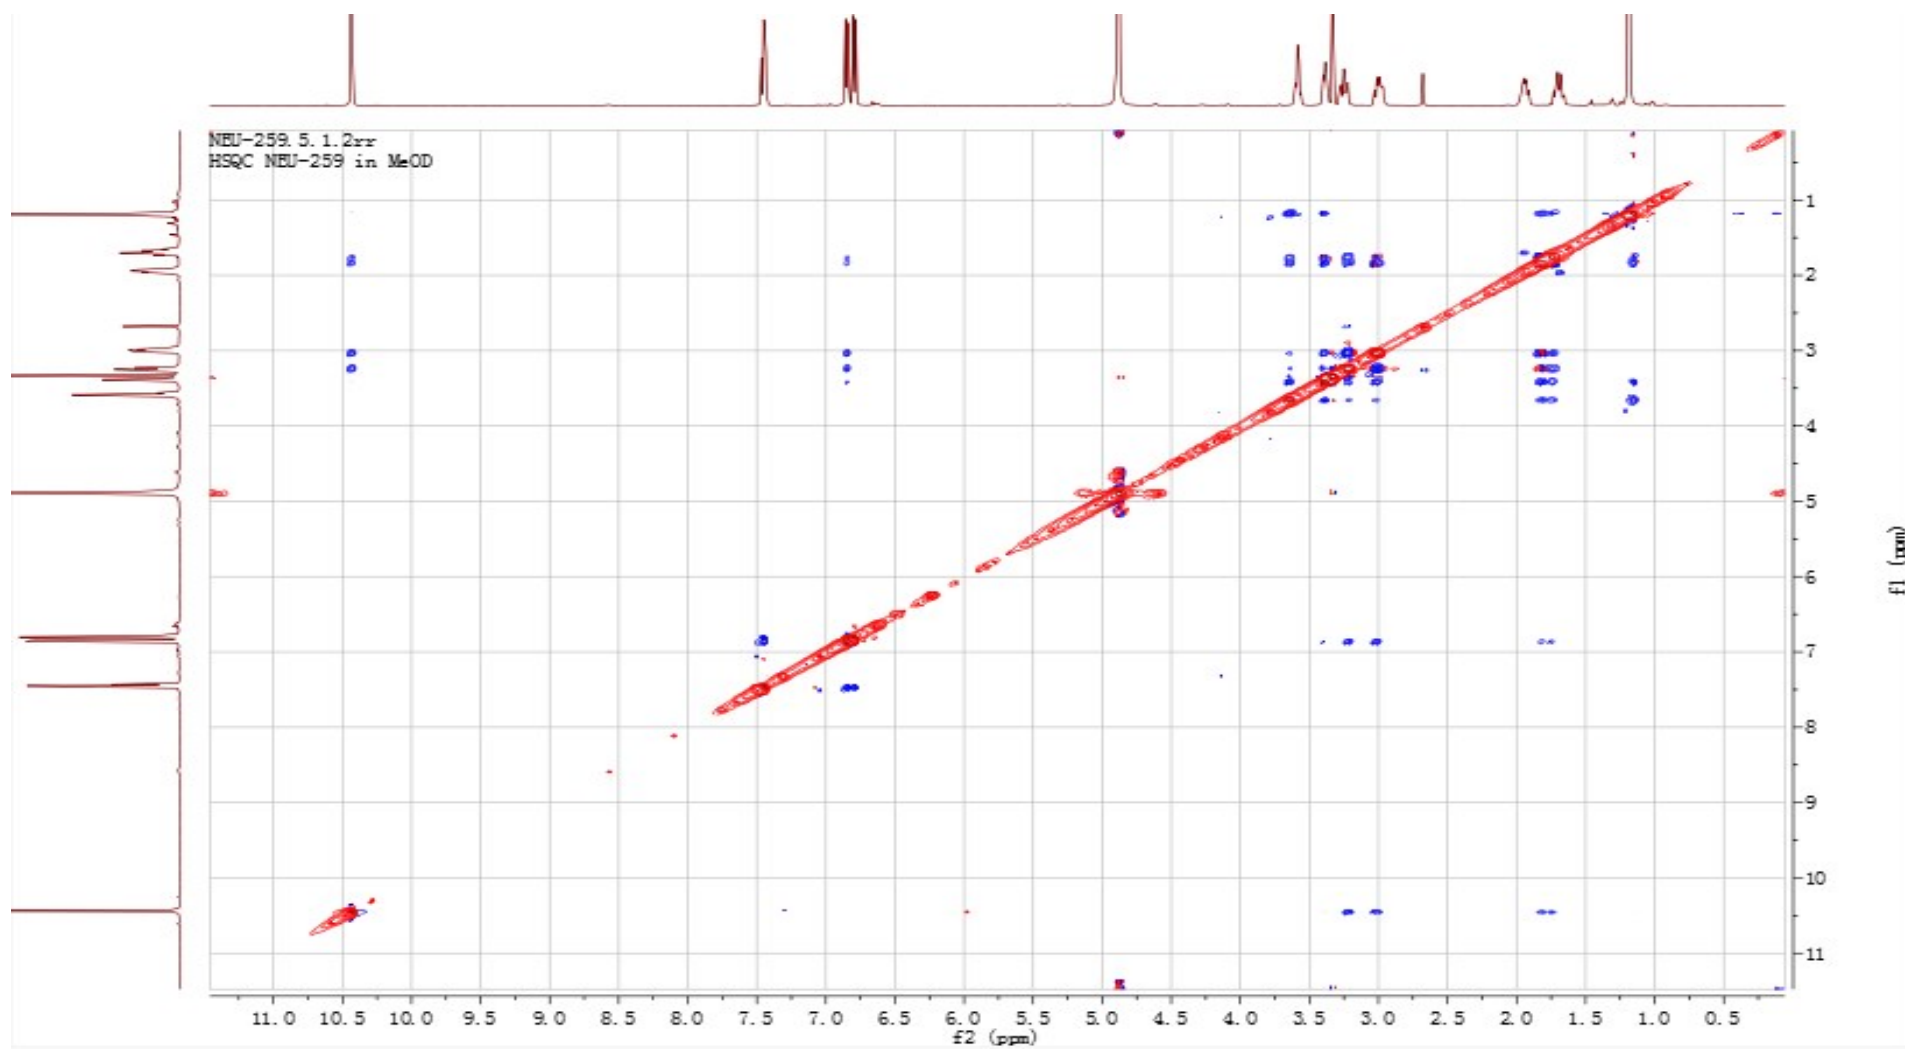

Figure S7. NOESY spectrum of the new compound **1**

## Qualitative Analysis Report

|                        |                                   |               |             |
|------------------------|-----------------------------------|---------------|-------------|
| Data Filename          | LH-2-NEG.d                        | Sample Name   | Unavailable |
| Sample Type            | Unavailable                       | Position      | Unavailable |
| Instrument Name        | Unavailable                       | User Name     | Unavailable |
| Acq Method             |                                   | Acquired Time | Unavailable |
| IRM Calibration Status | Success                           | DA Method     | analysis.m  |
| Comment                | Sample information is unavailable |               |             |

### User Spectra

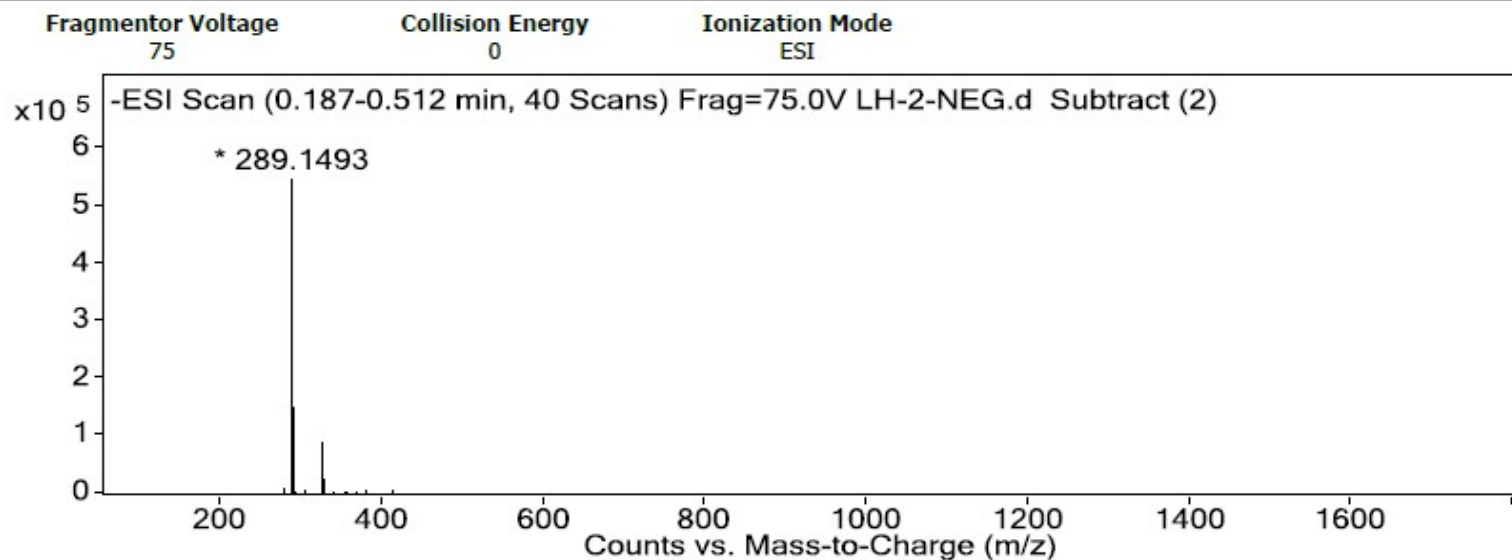

Figure S8. HRESI-MS spectrum of the new compound 2

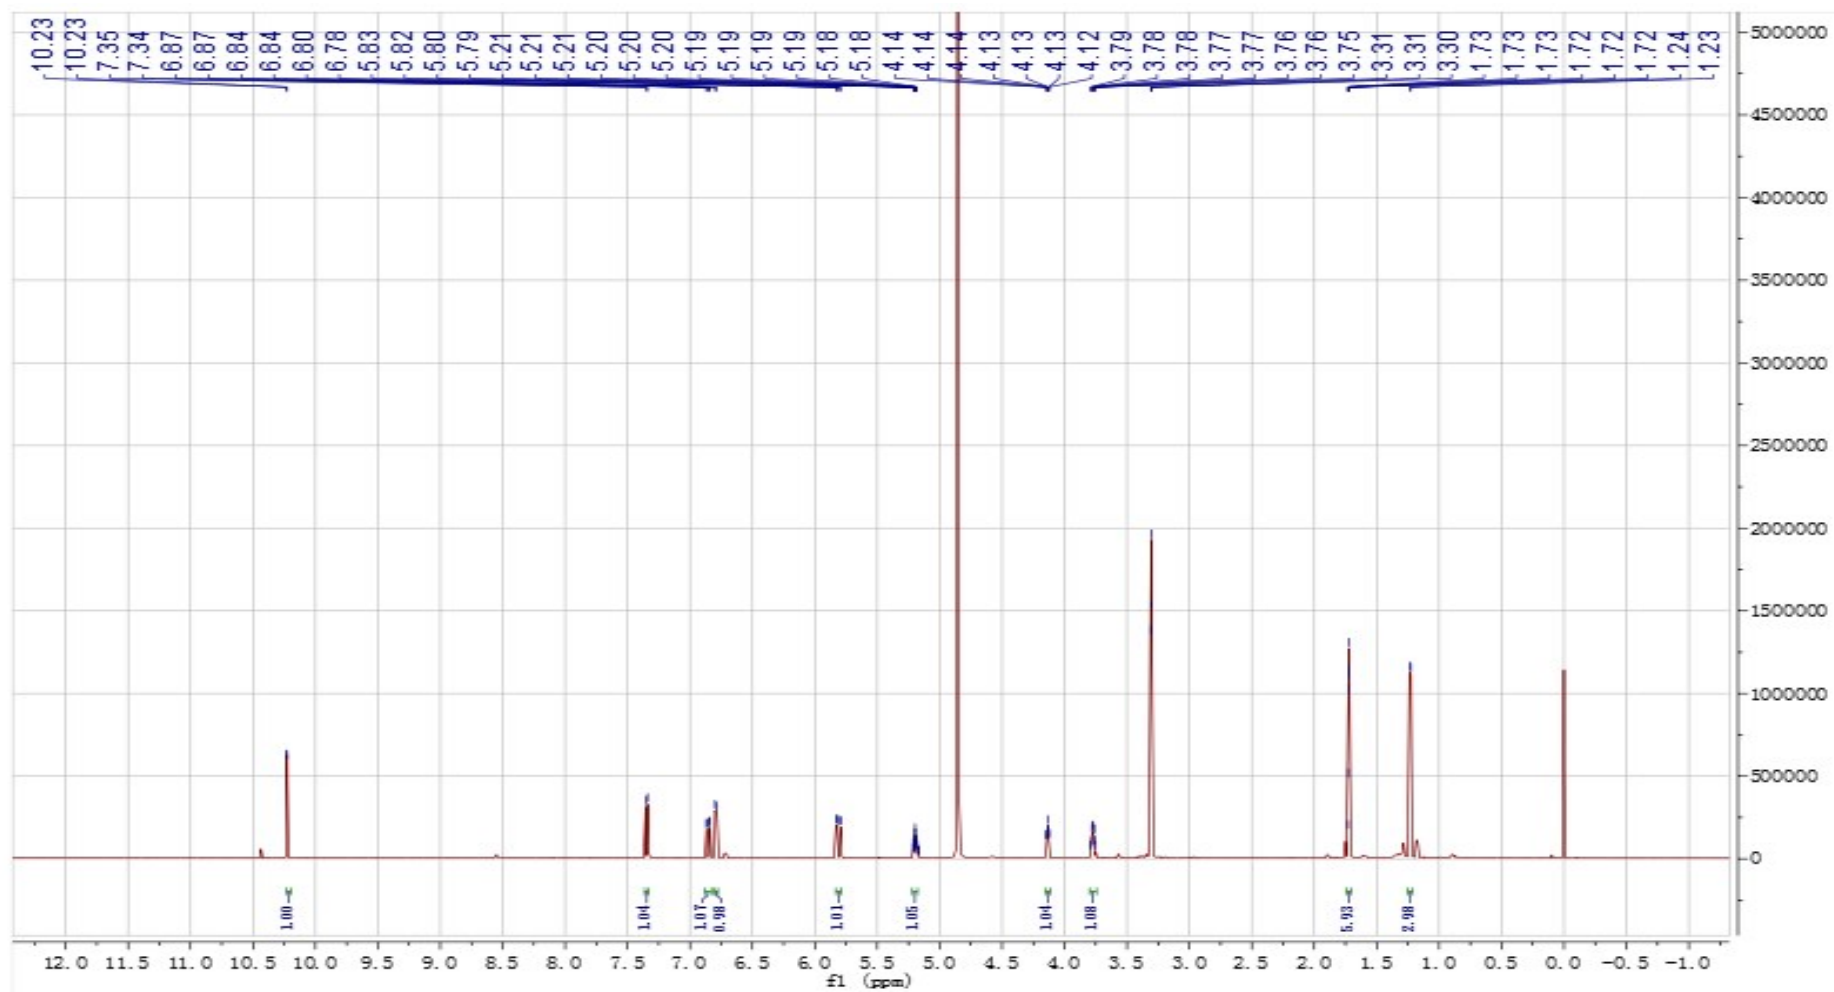

Figure S9.  $^1\text{H}$  NMR (600 MHz,  $\text{CD}_3\text{OD}$ ) spectrum of the new compound **2**

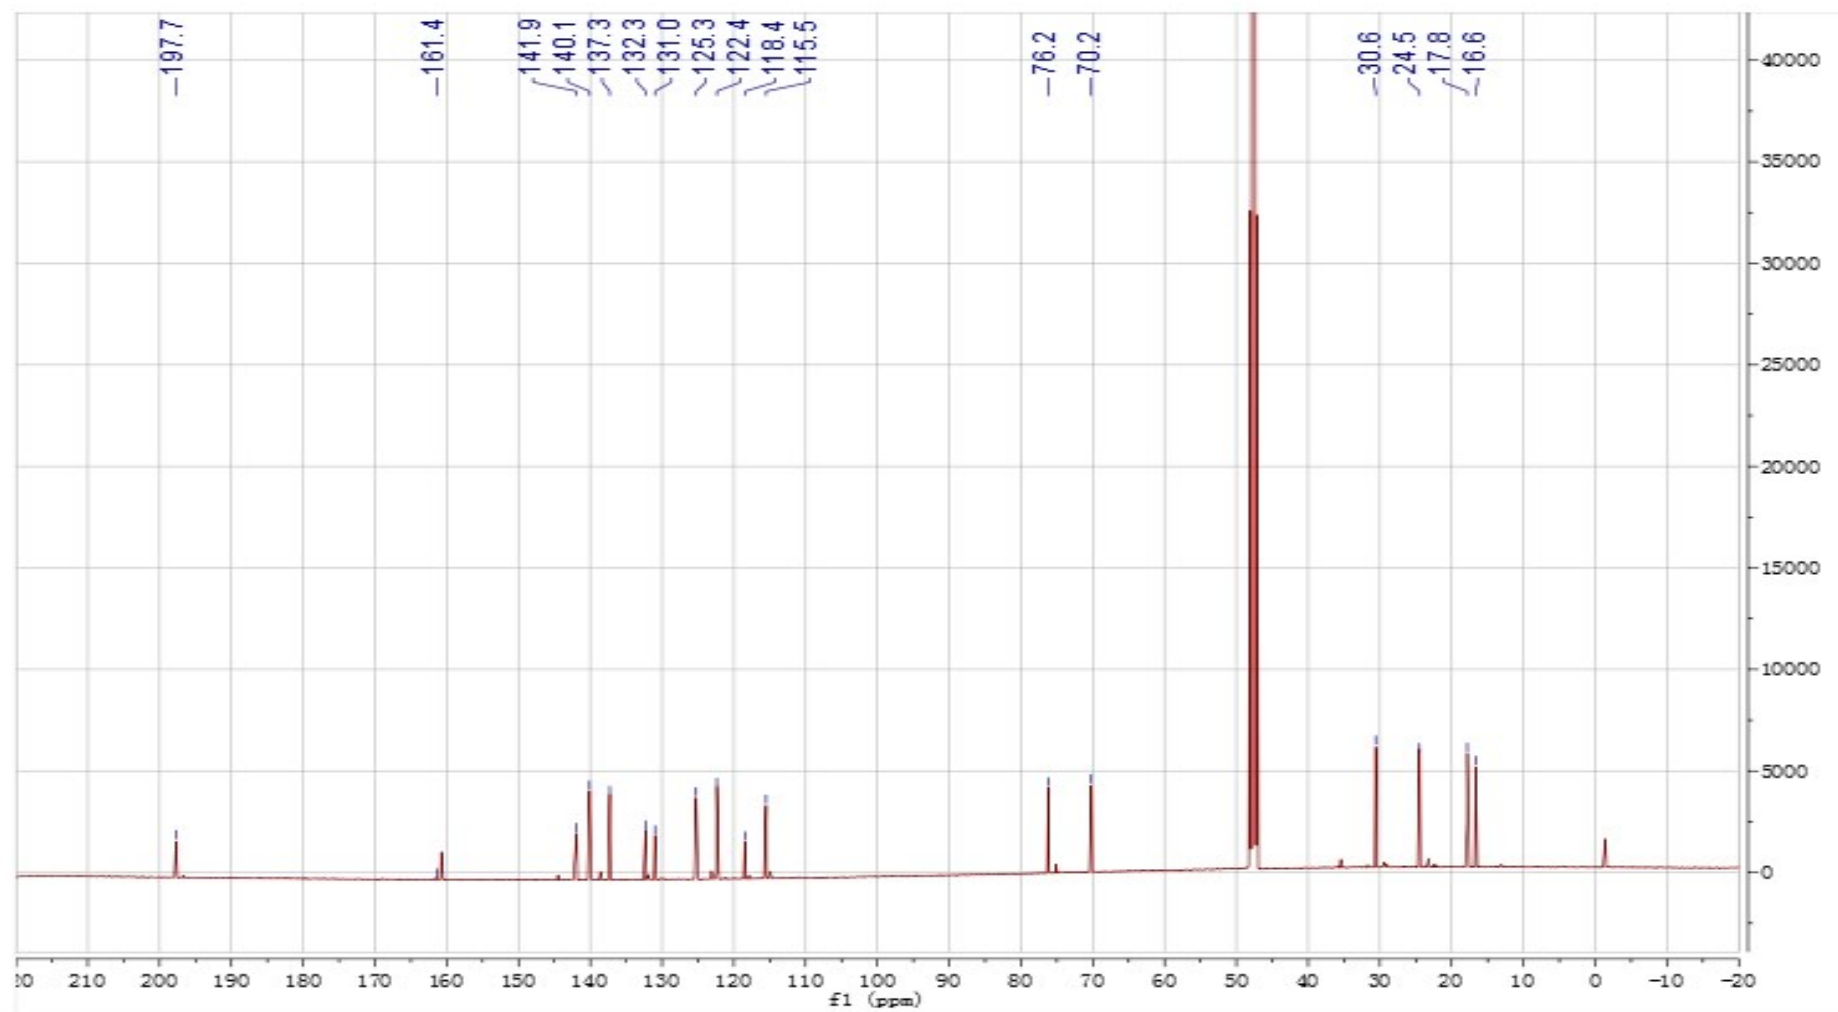

Figure S10.  $^{13}\text{C}$  NMR (150 MHz,  $\text{CD}_3\text{OD}$ ) spectrum of the new compound **2**

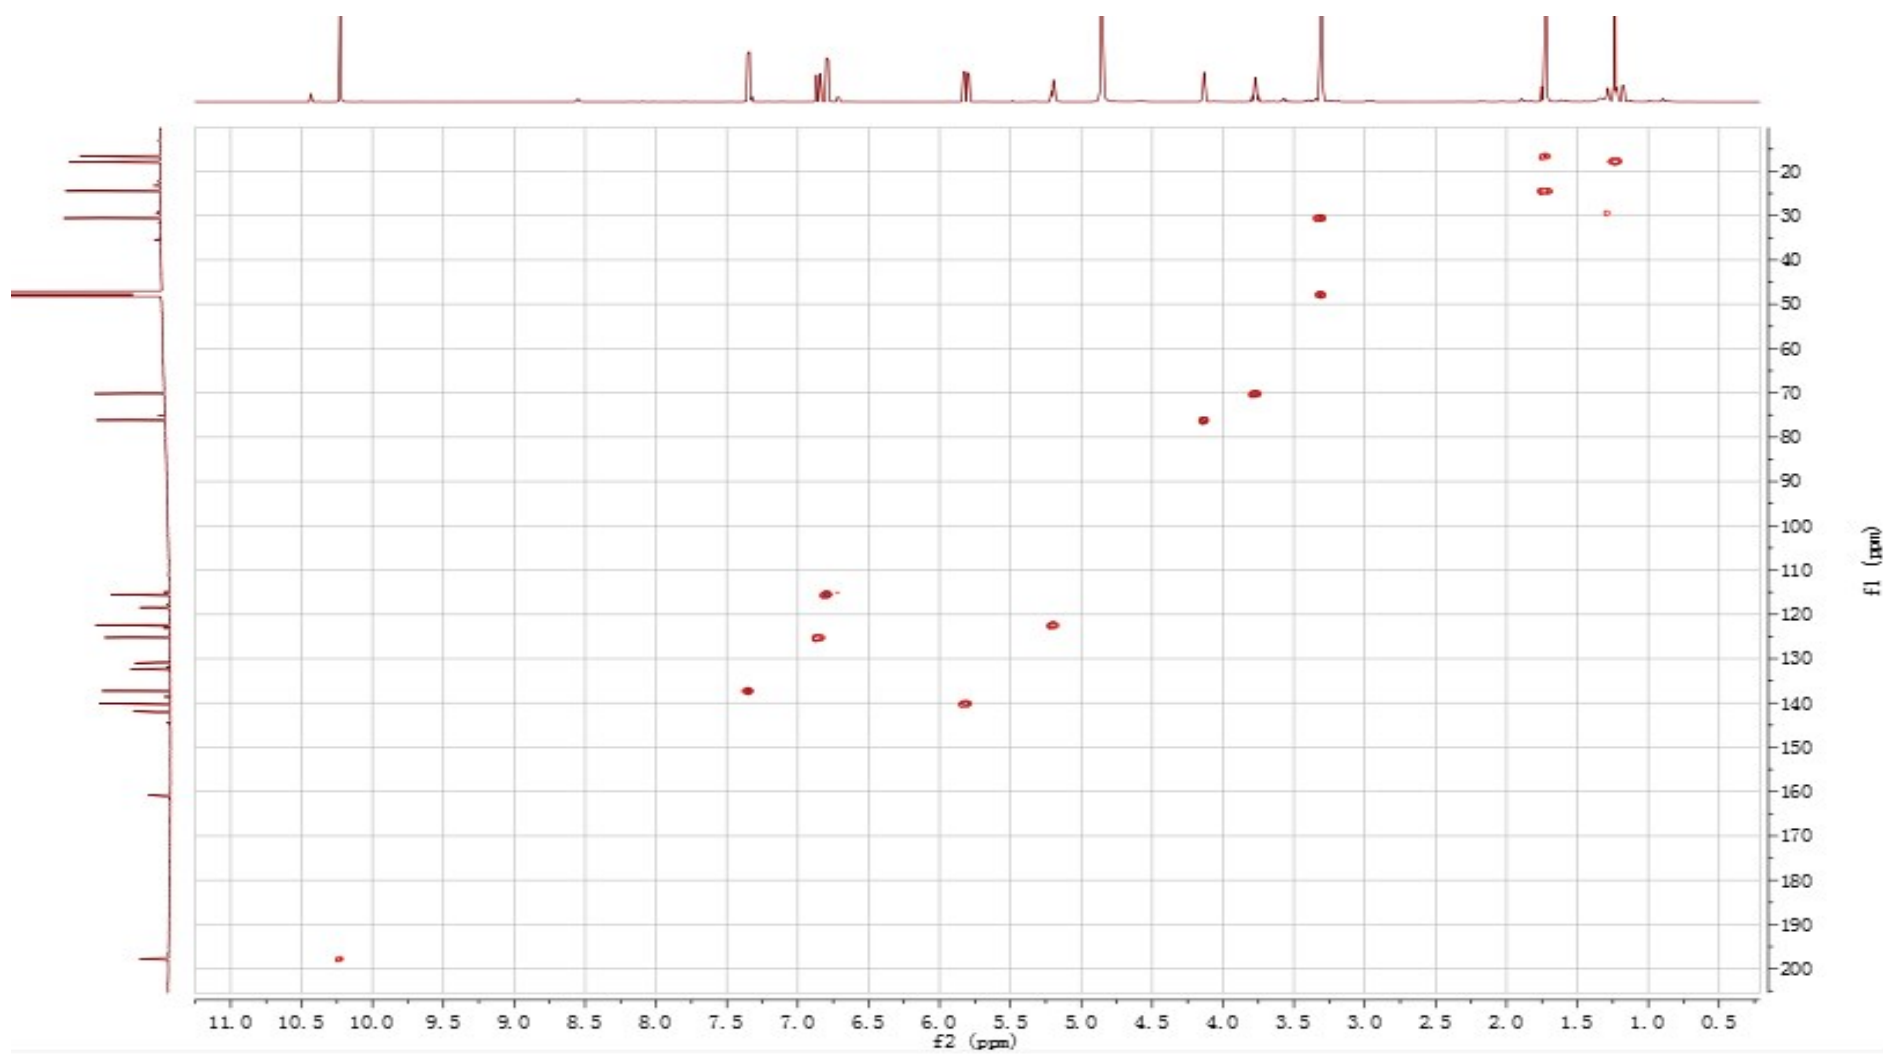

Figure S11. HSQC spectrum of the new compound 2



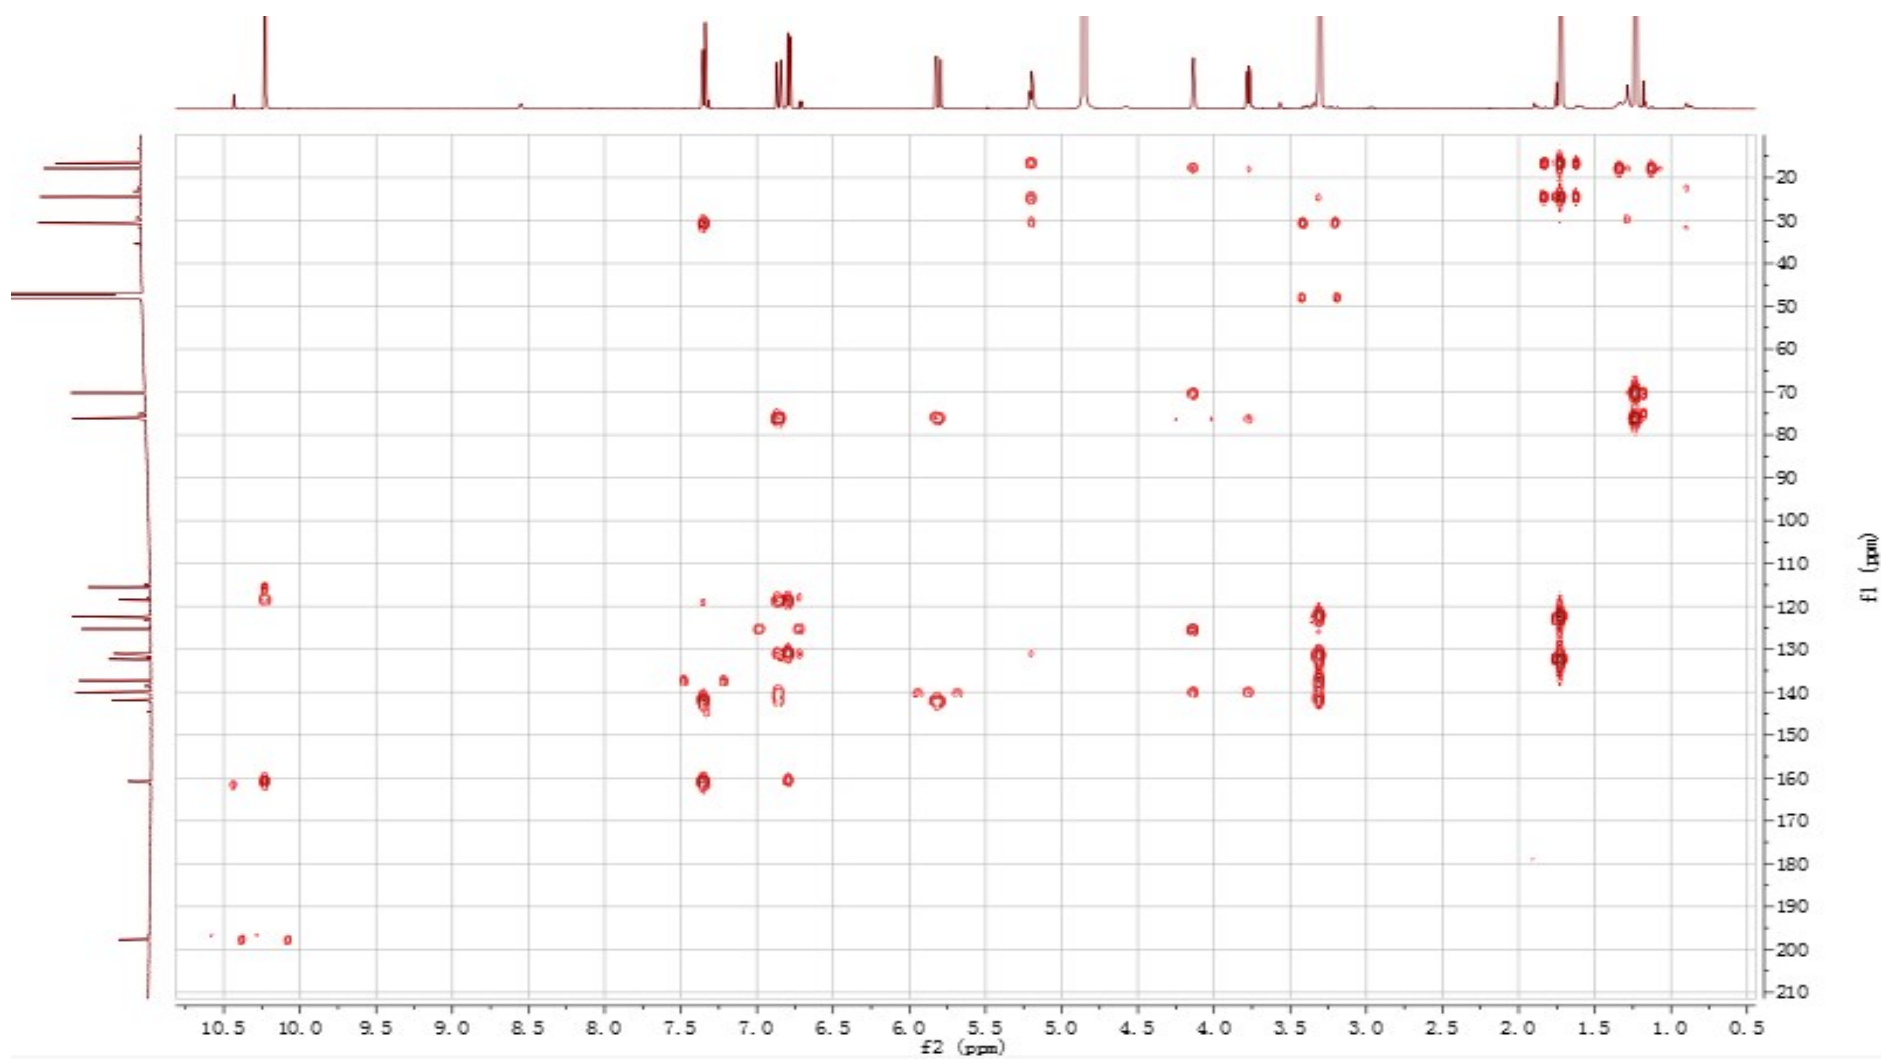

Figure S12. HMBC spectrum of the new compound **2**

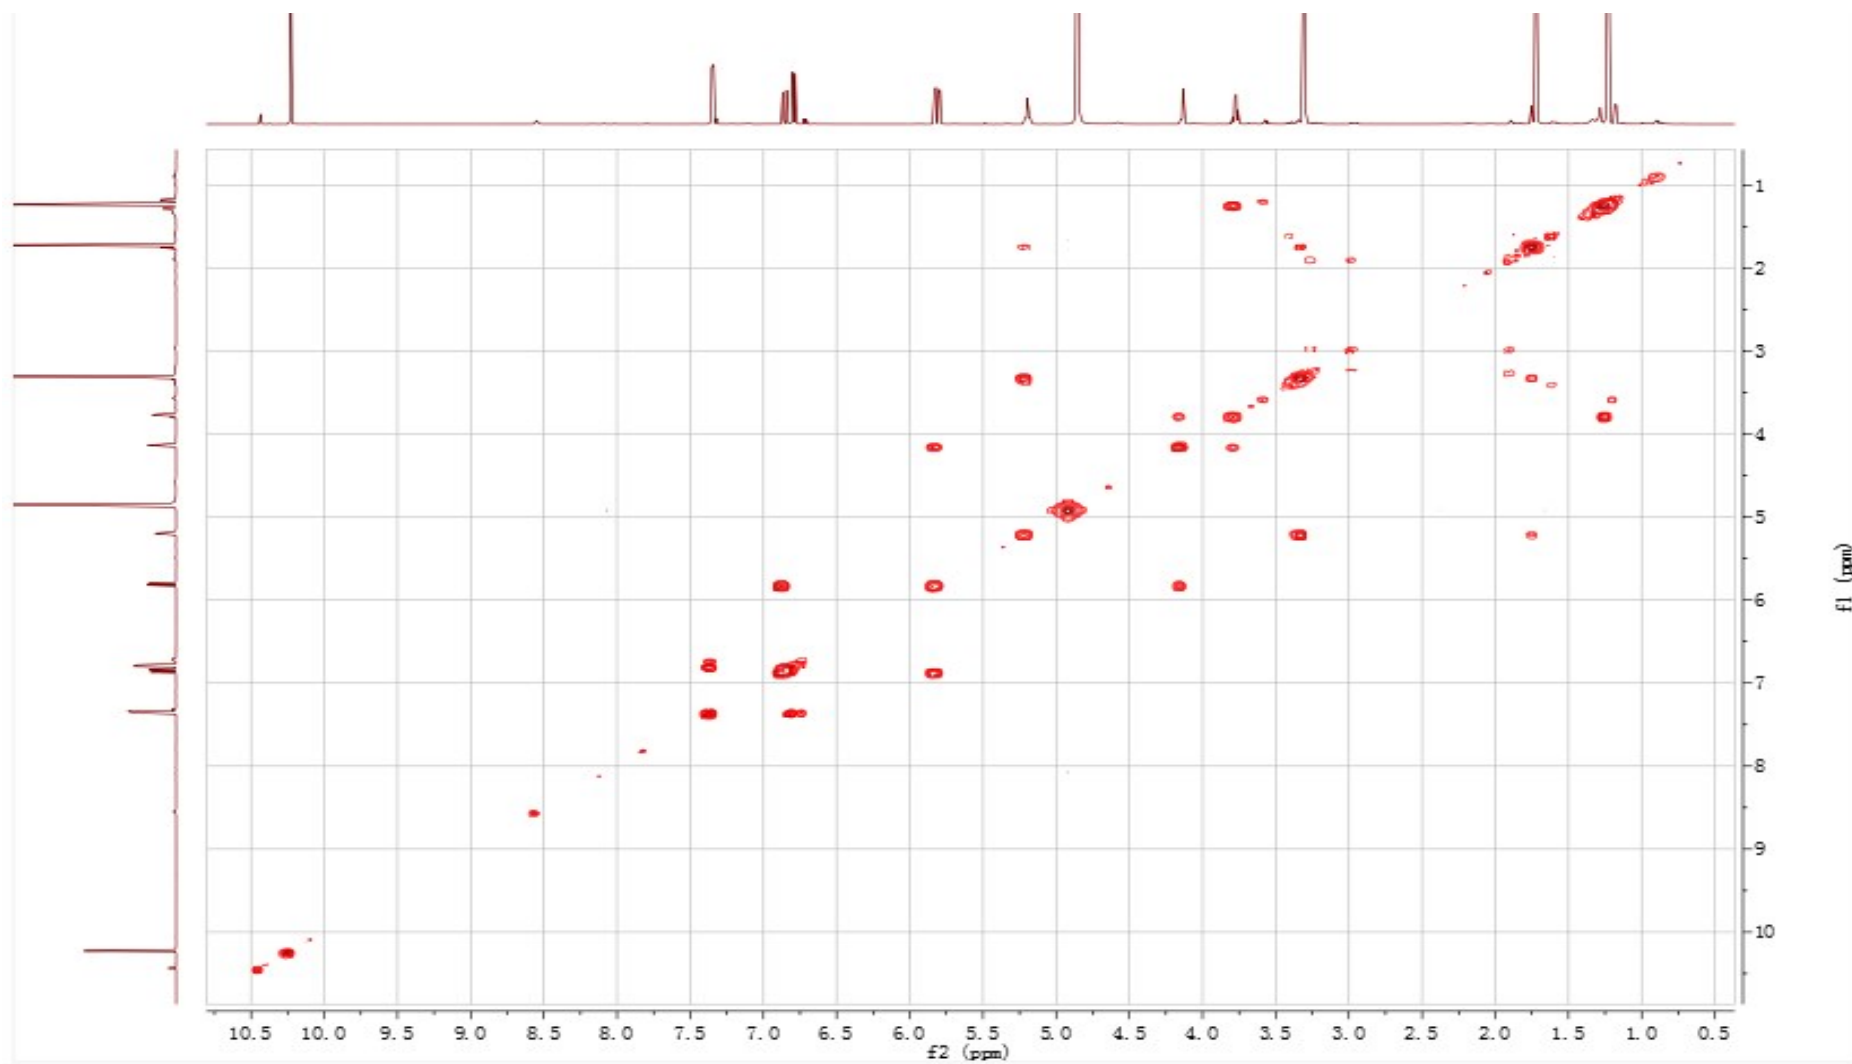

Figure S13. COSY spectrum of the new compound **2**

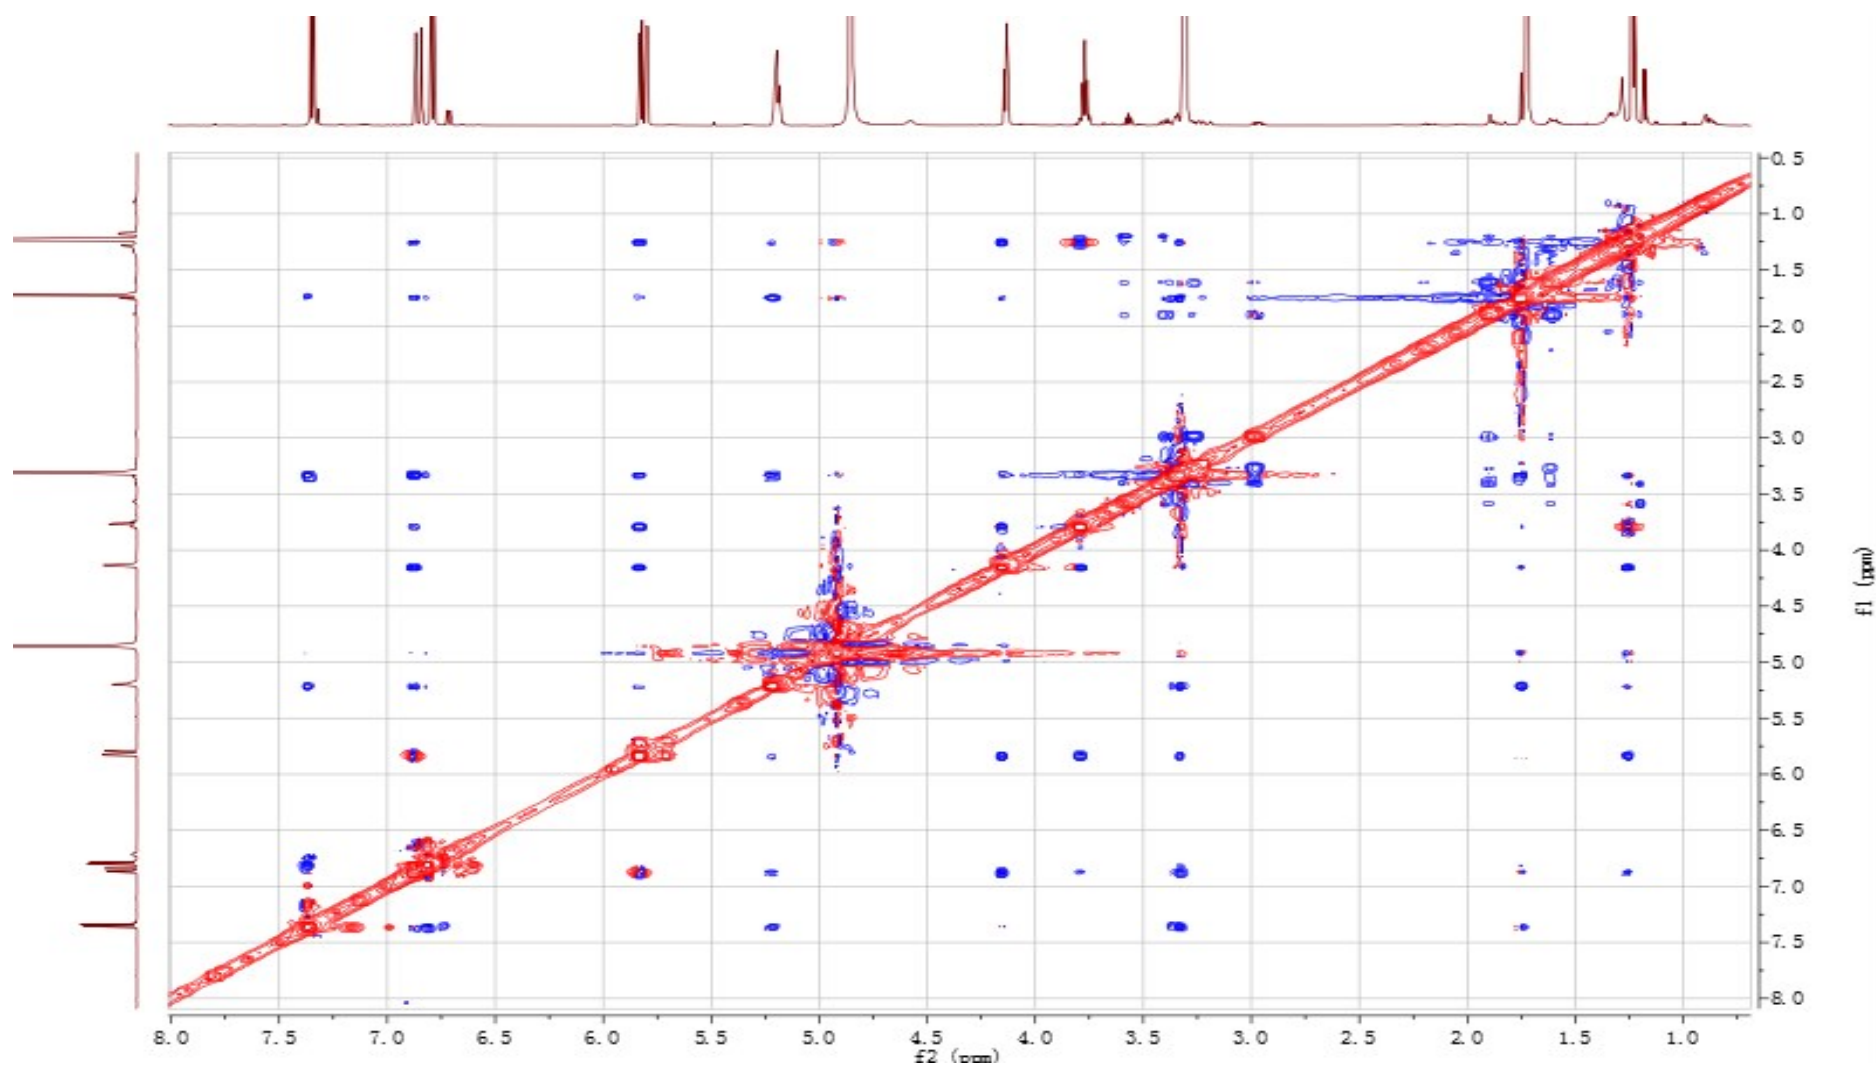

Figure S14. NOESY spectrum of the new compound 2

## Qualitative Analysis Report

|                               |                        |                    |                      |
|-------------------------------|------------------------|--------------------|----------------------|
| <b>Data Filename</b>          | LH-482-POS.d           | <b>Sample Name</b> |                      |
| <b>Sample Type</b>            | Sample                 | <b>Position</b>    | P1-A2                |
| <b>Instrument Name</b>        | Instrument 1           | <b>User Name</b>   |                      |
| <b>Acq Method</b>             | default-20191128-pos.m | <b>Acquired</b>    | 7/14/2020 9:35:28 AM |
|                               |                        | <b>Time</b>        |                      |
| <b>IRM Calibration Status</b> | success                | <b>DA Method</b>   | analysis.m           |
| <b>Comment</b>                |                        |                    |                      |

### User Spectra

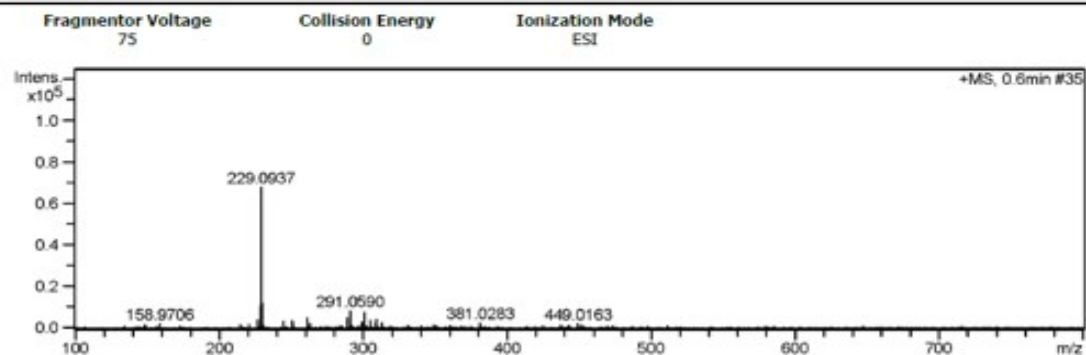

Figure S15. HRESI-MS spectrum of the new compound **3**

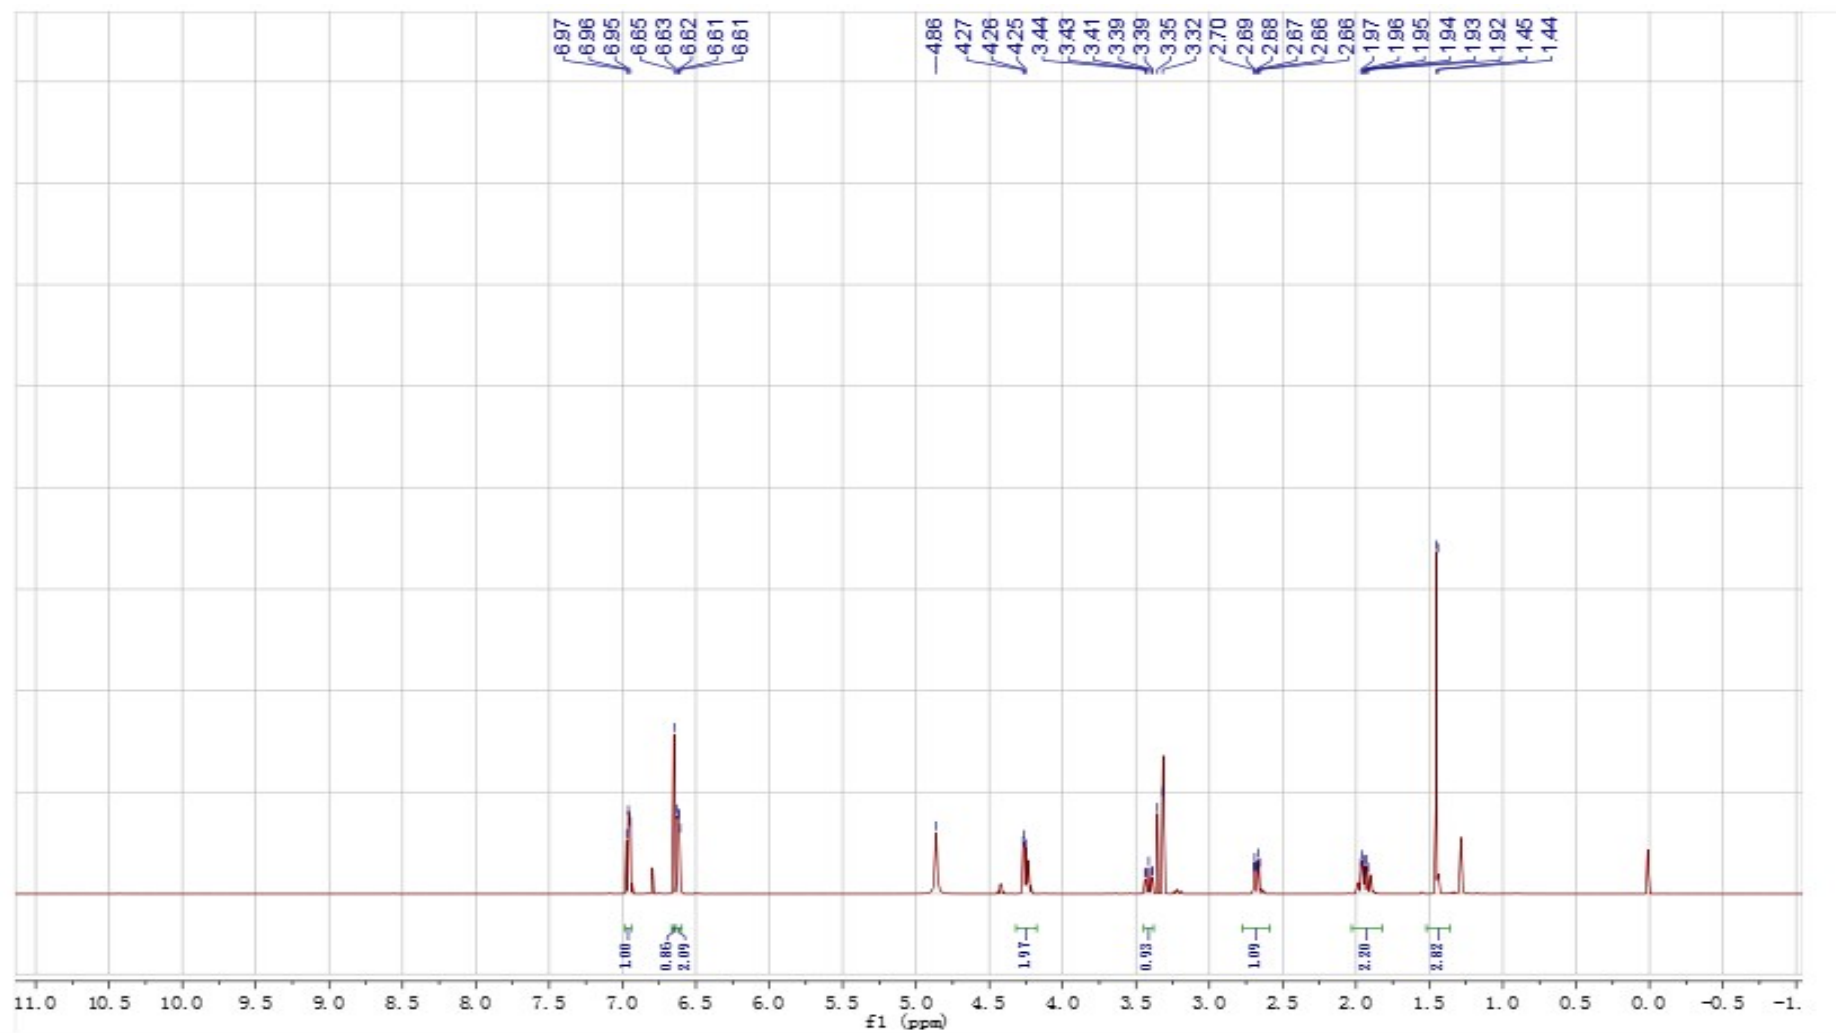

Figure S16. <sup>1</sup>H NMR (600 MHz, CD<sub>3</sub>OD) spectrum of the new compound **3**

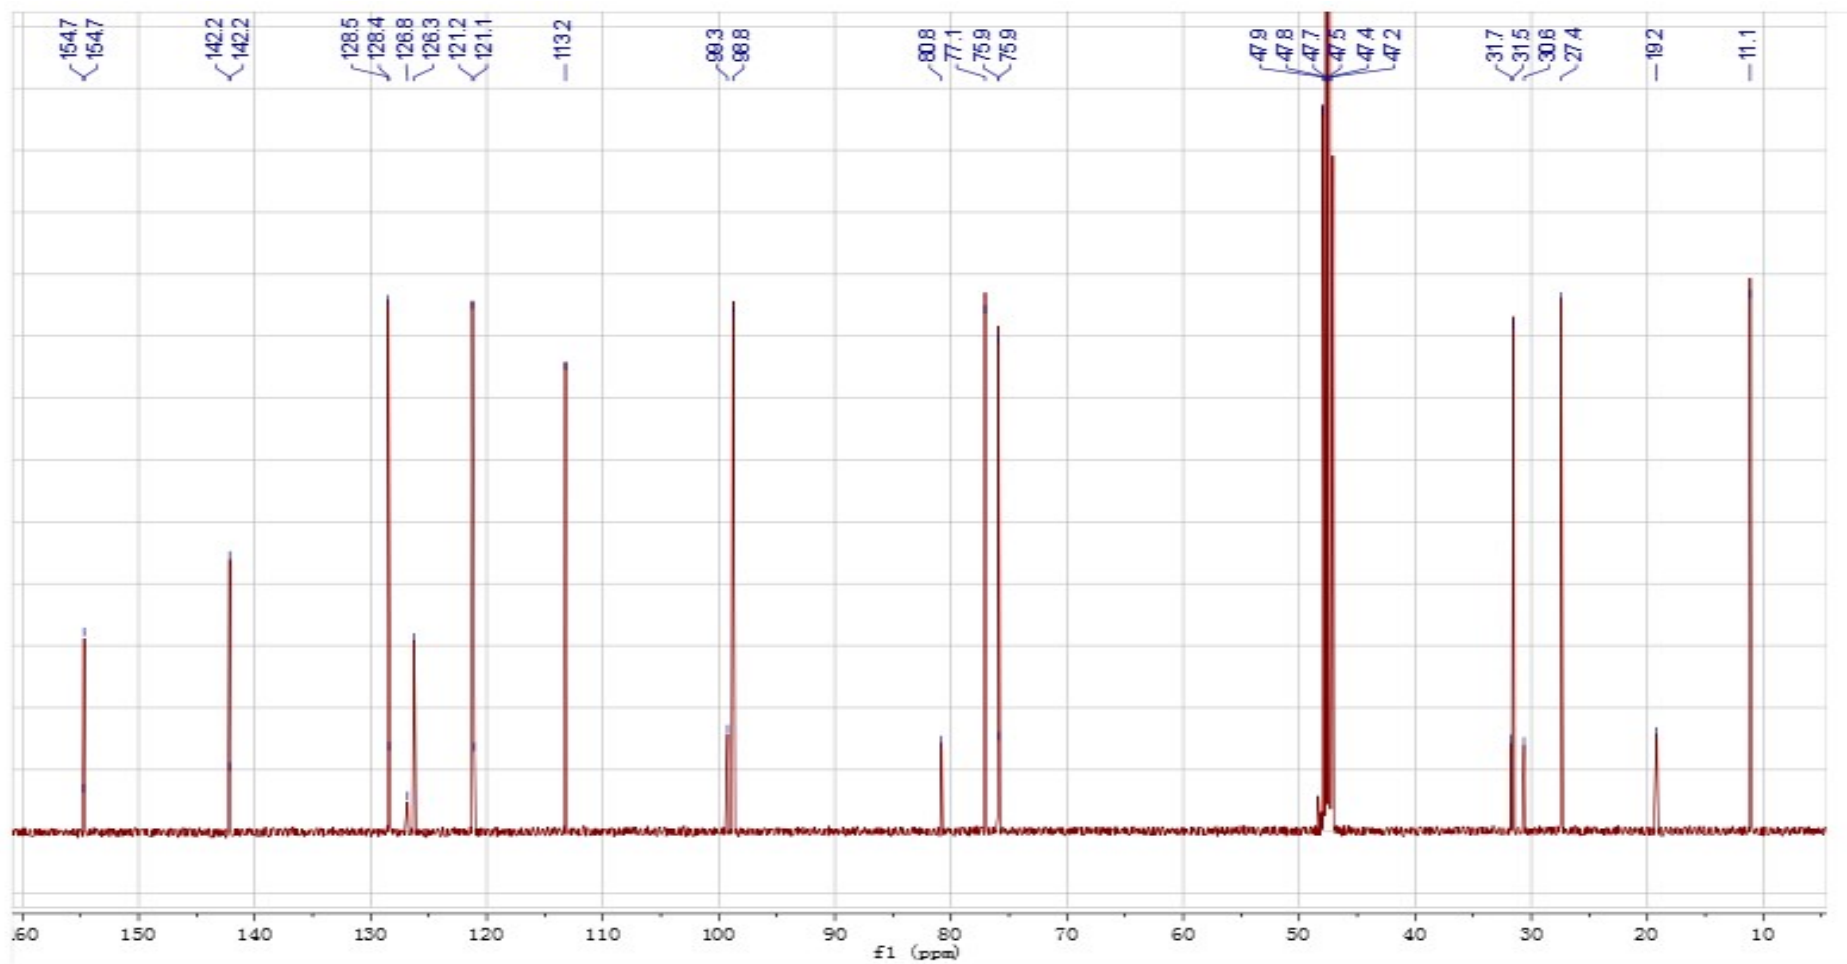

Figure S17.  $^{13}\text{C}$  NMR (150 MHz,  $\text{CD}_3\text{OD}$ ) spectrum of the new compound **3**

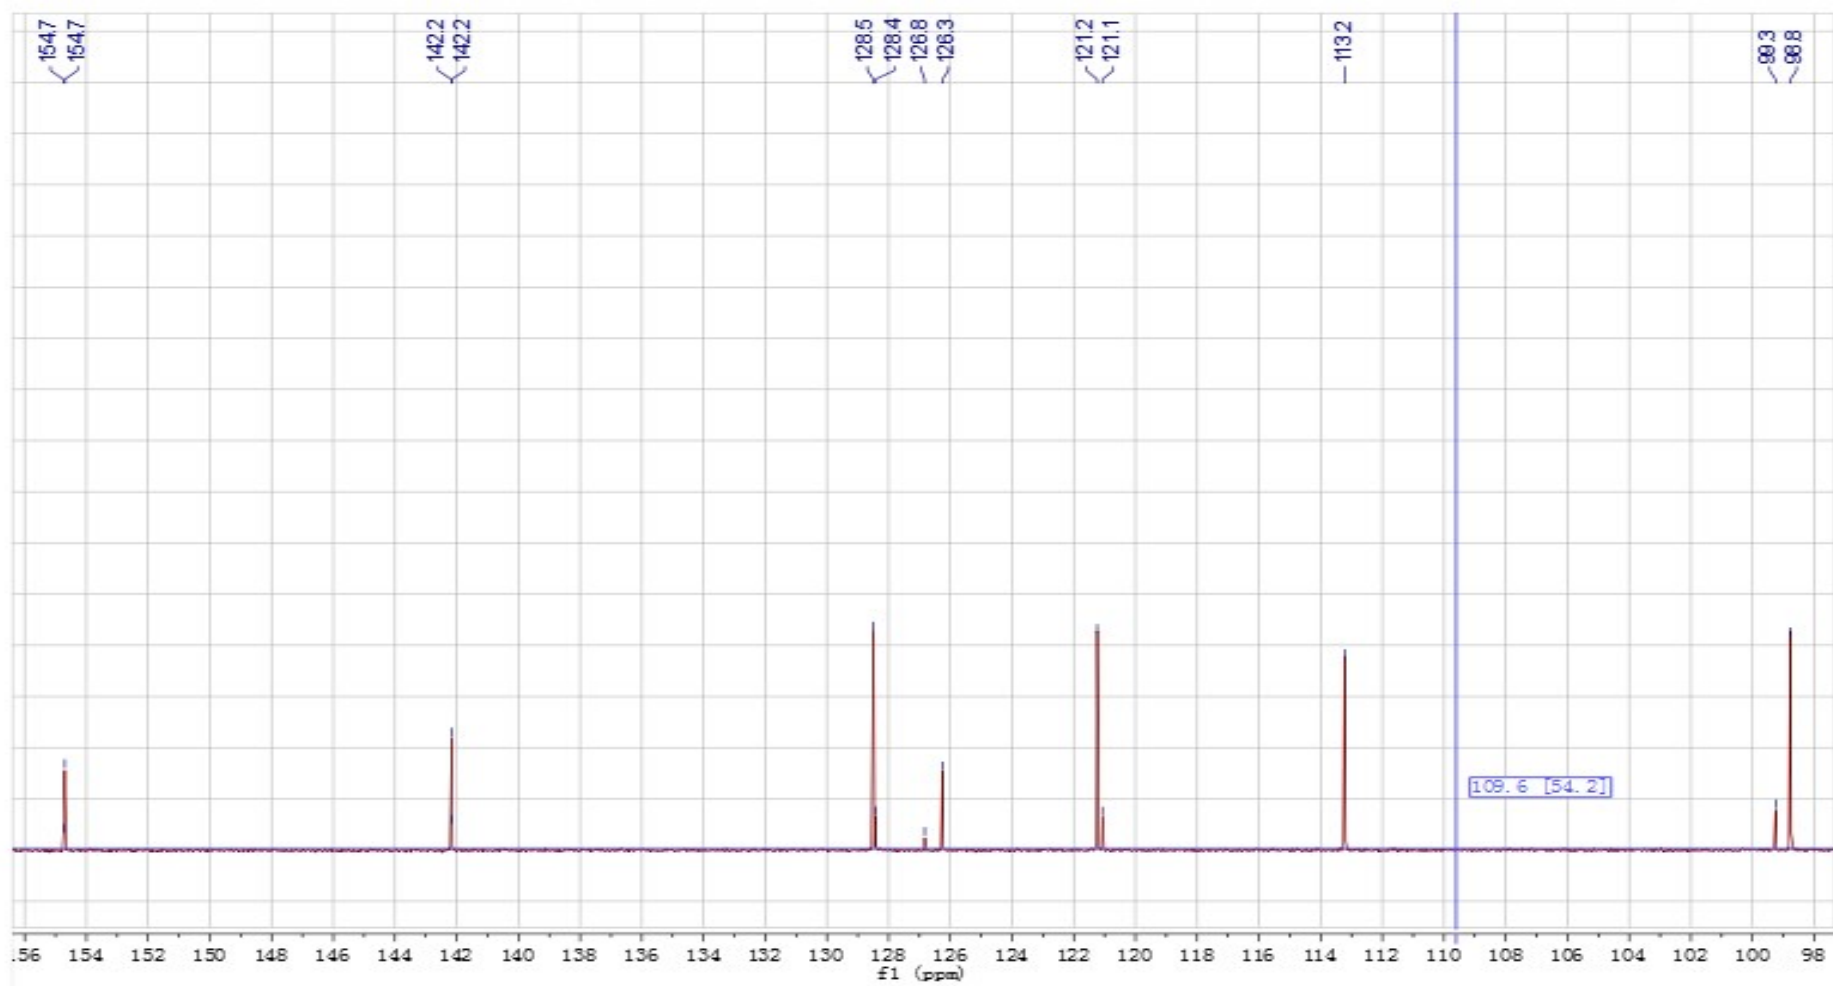

Figure S18. Enlarged-1  $^{13}\text{C}$  NMR (150 MHz,  $\text{CD}_3\text{OD}$ ) spectrum of the new compound **3**

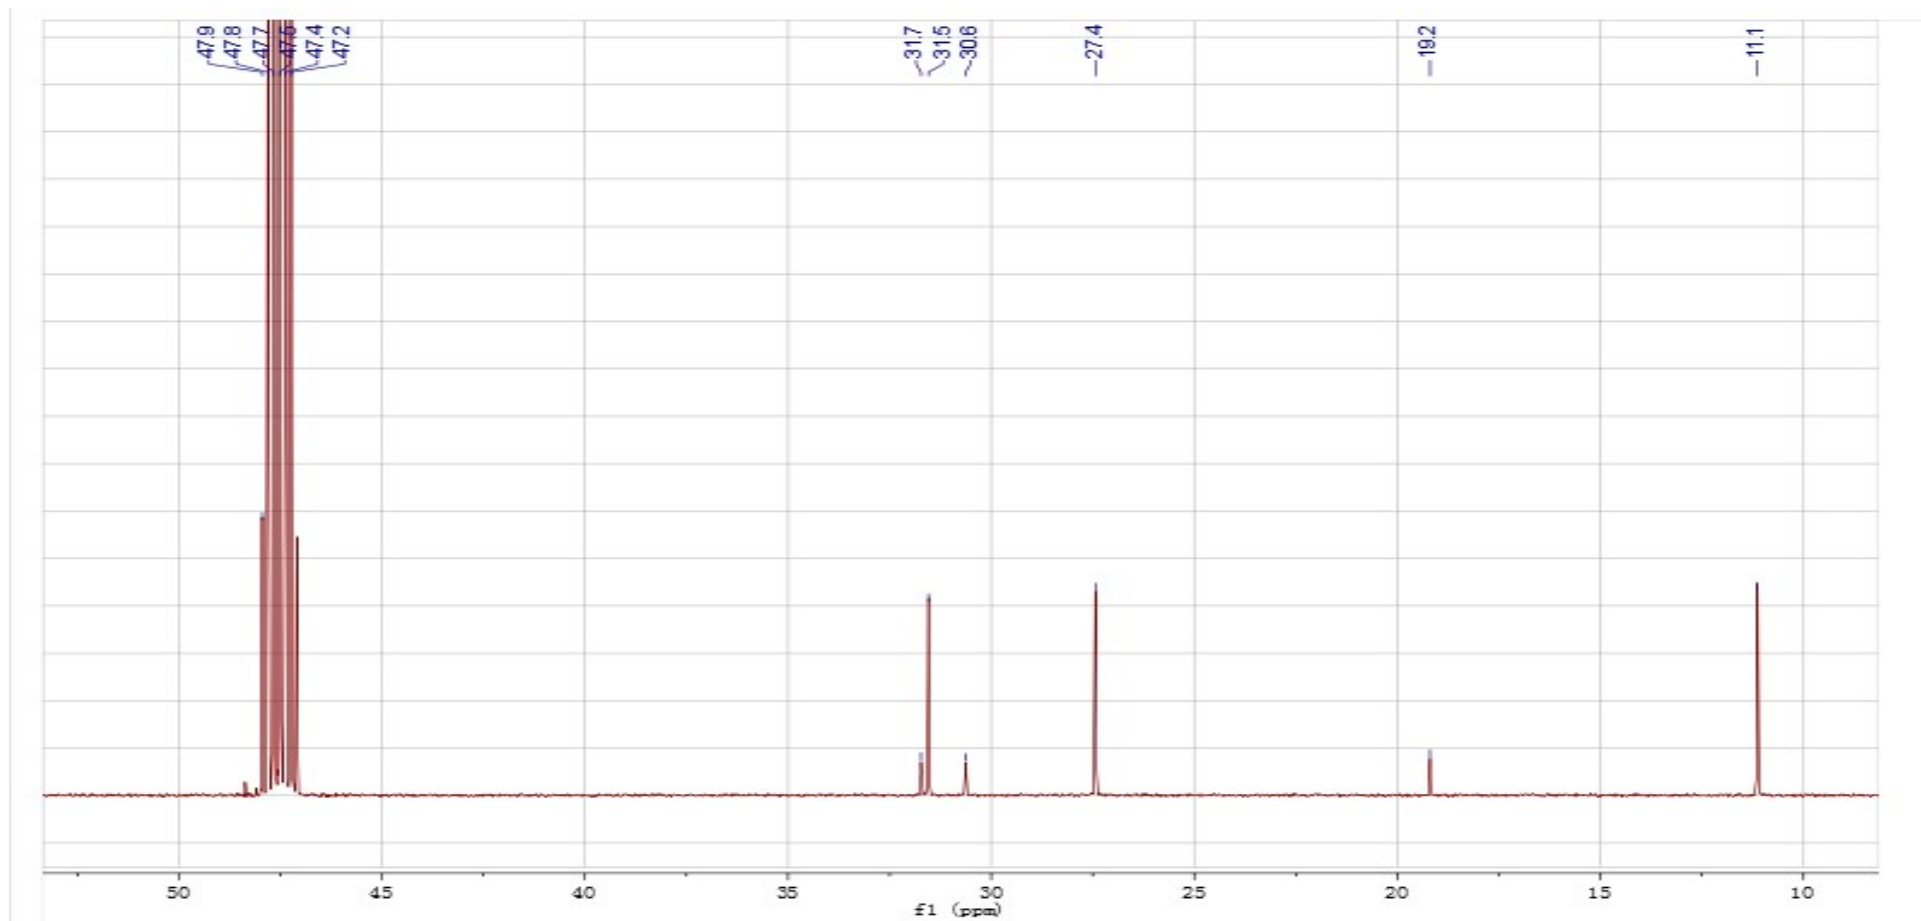

Figure S19. Enlarged-2  $^{13}\text{C}$  NMR (150 MHz,  $\text{CD}_3\text{OD}$ ) spectrum of the new compound **3**



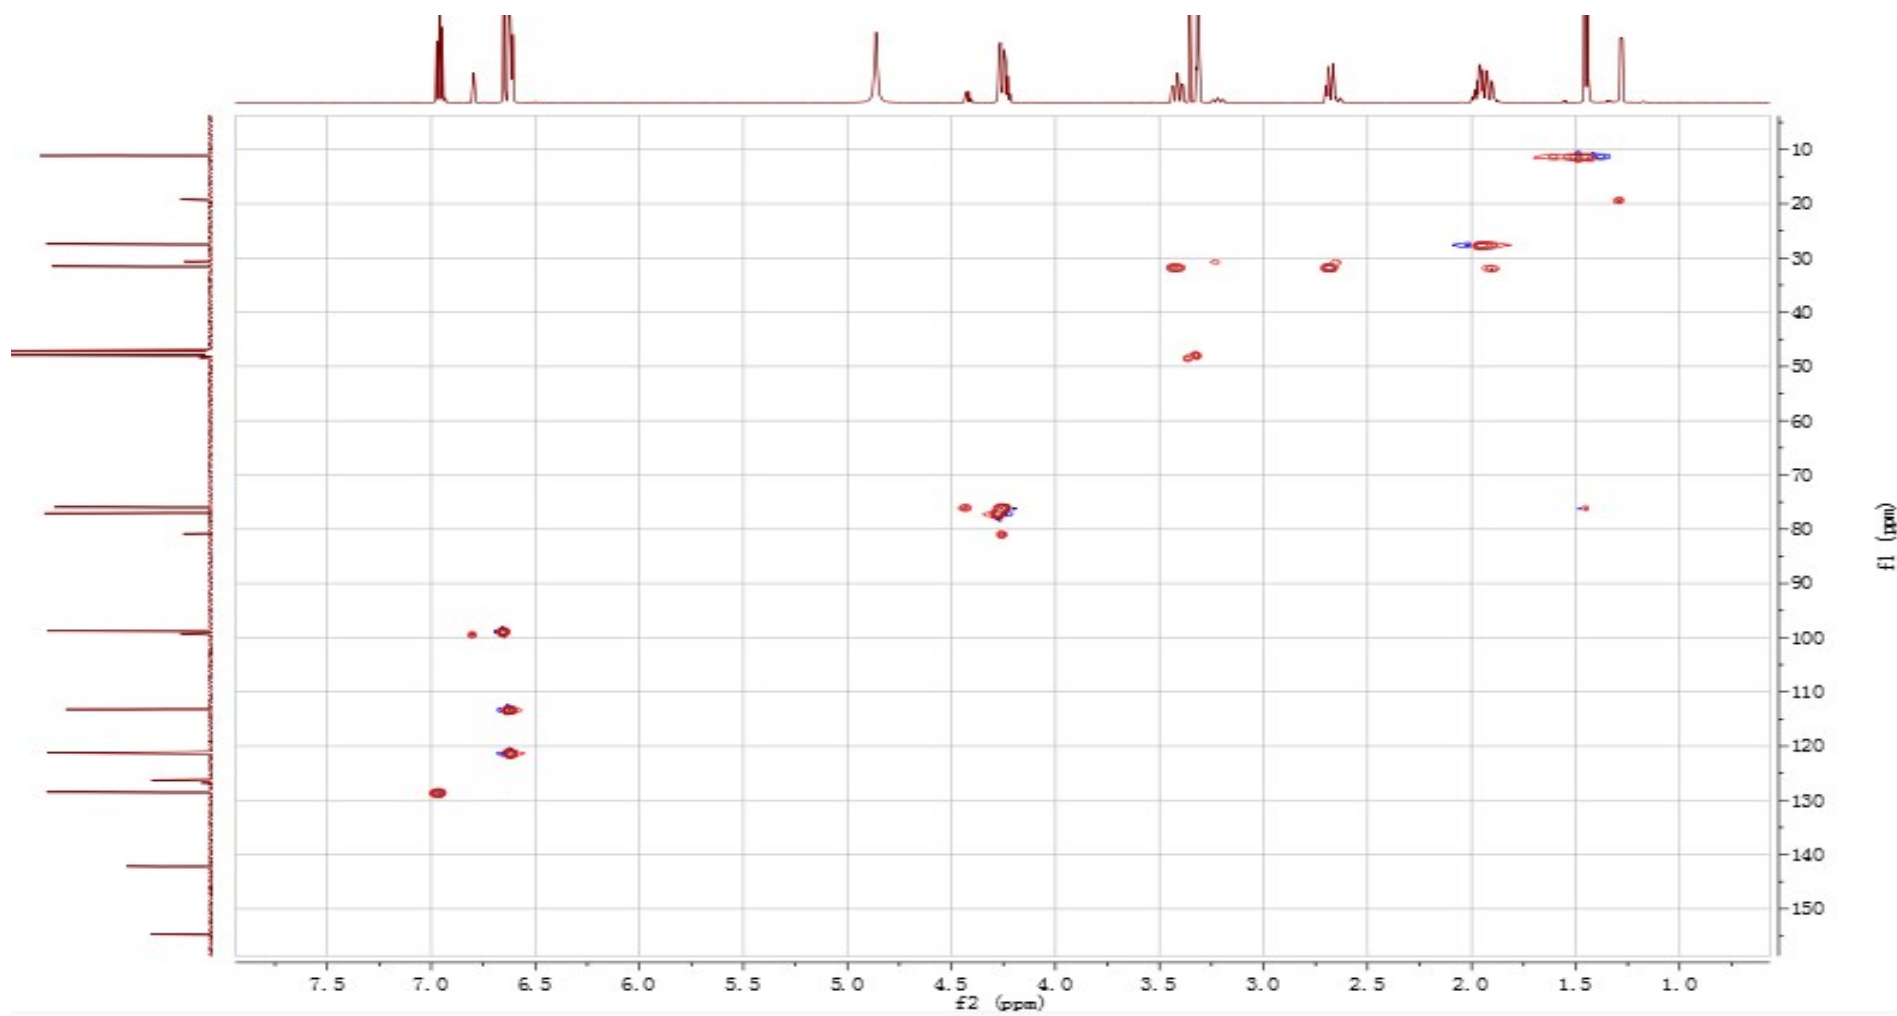

Figure S20. HSQC spectrum of the new compound **3**

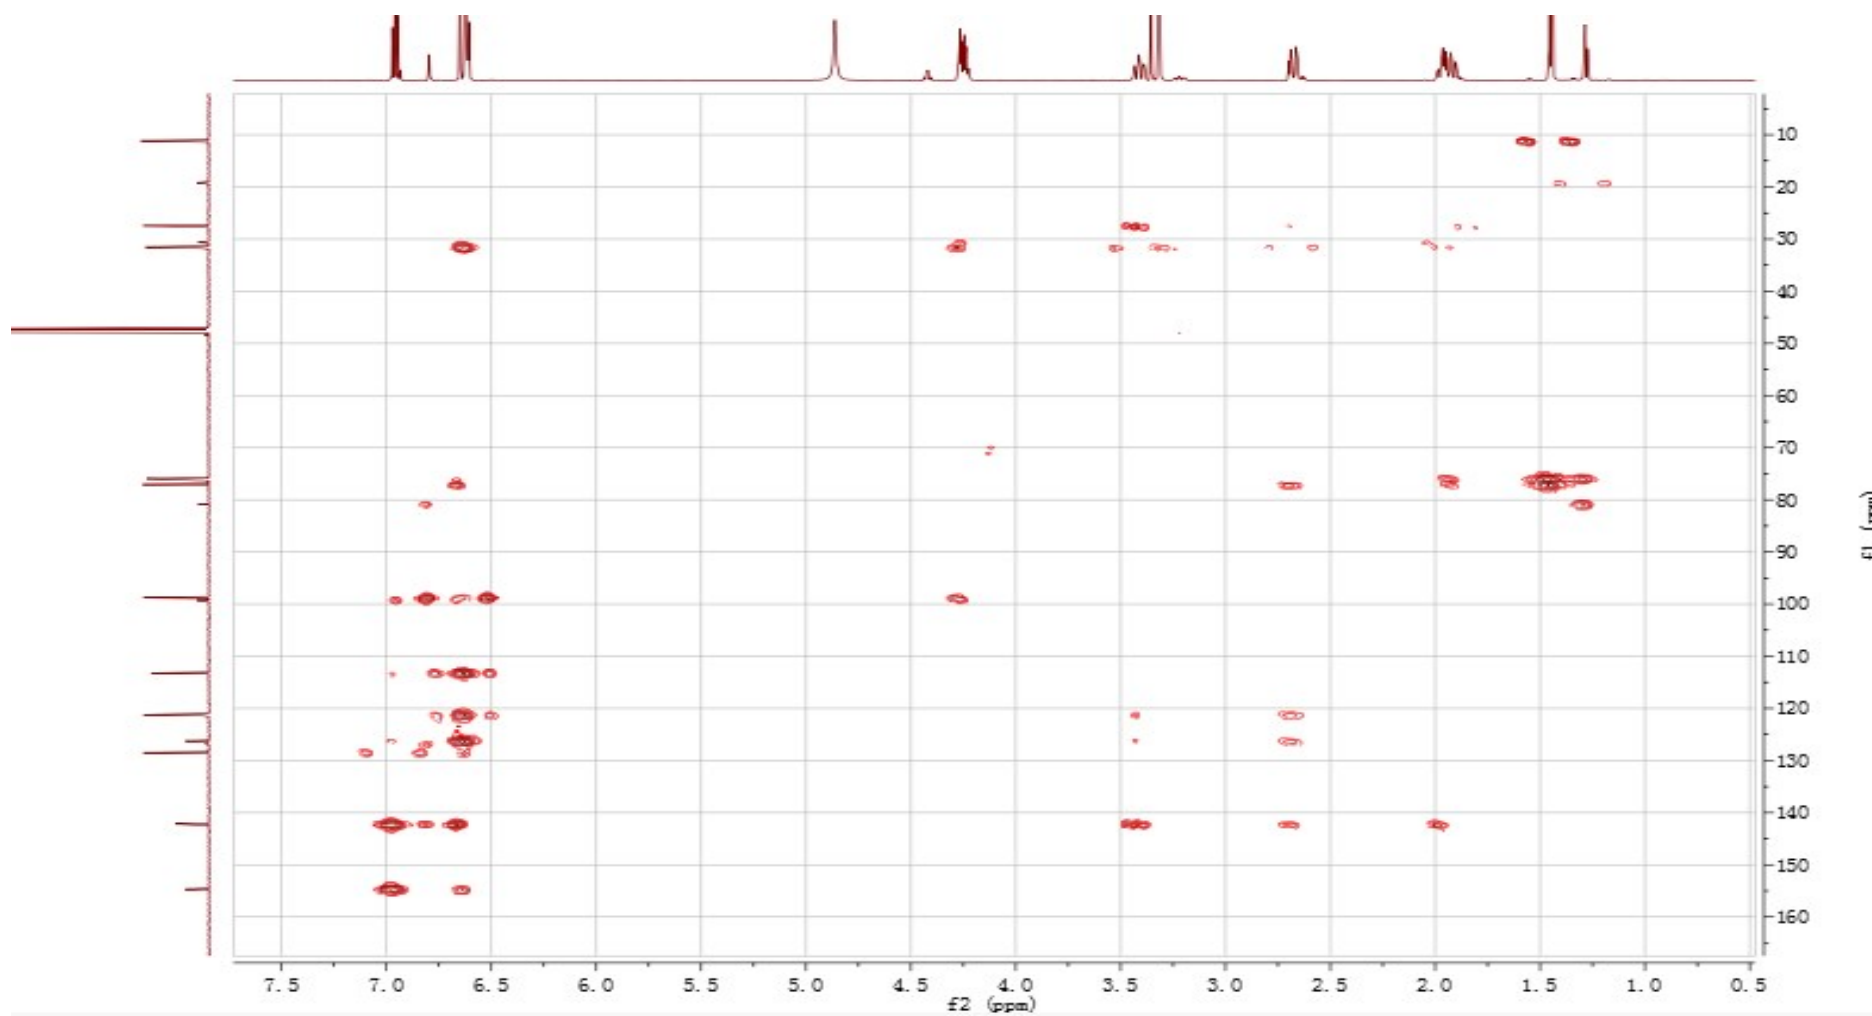

Figure S21. HMBC spectrum of the new compound **3**

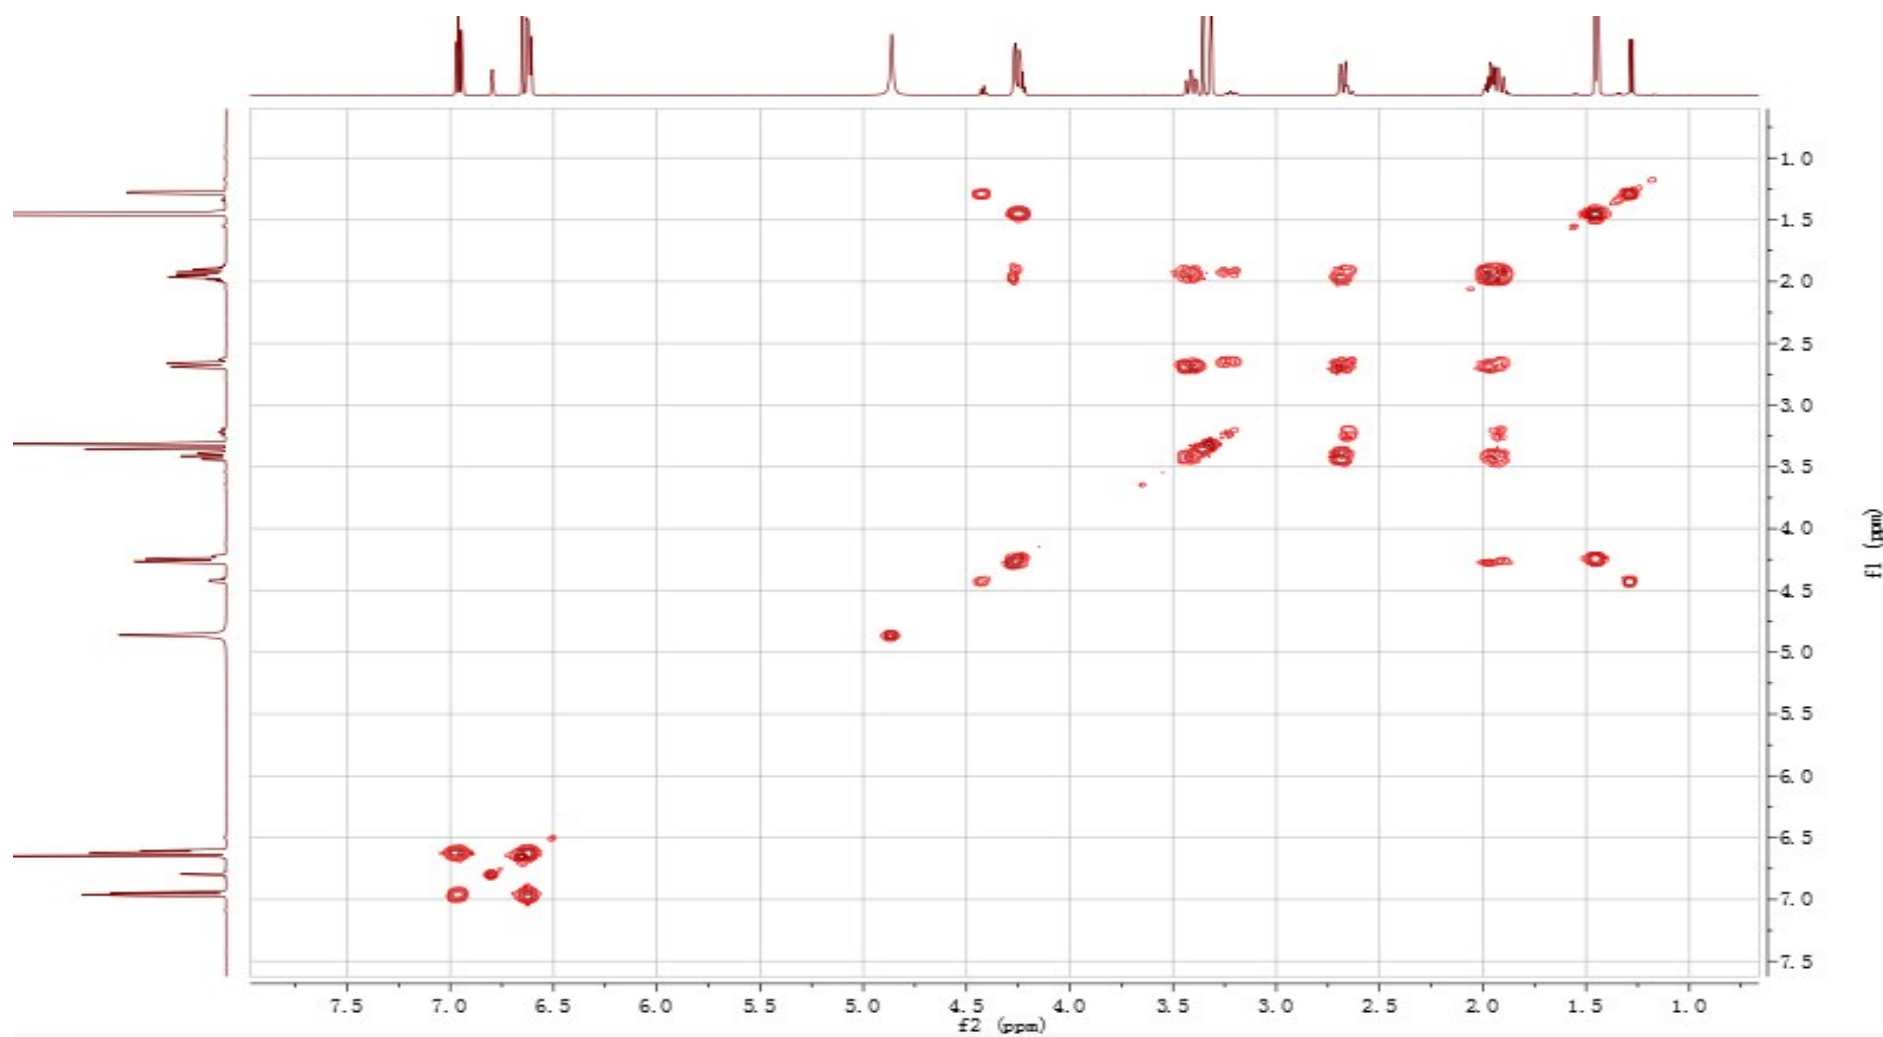

Figure S22. COSY spectrum of the new compound **3**

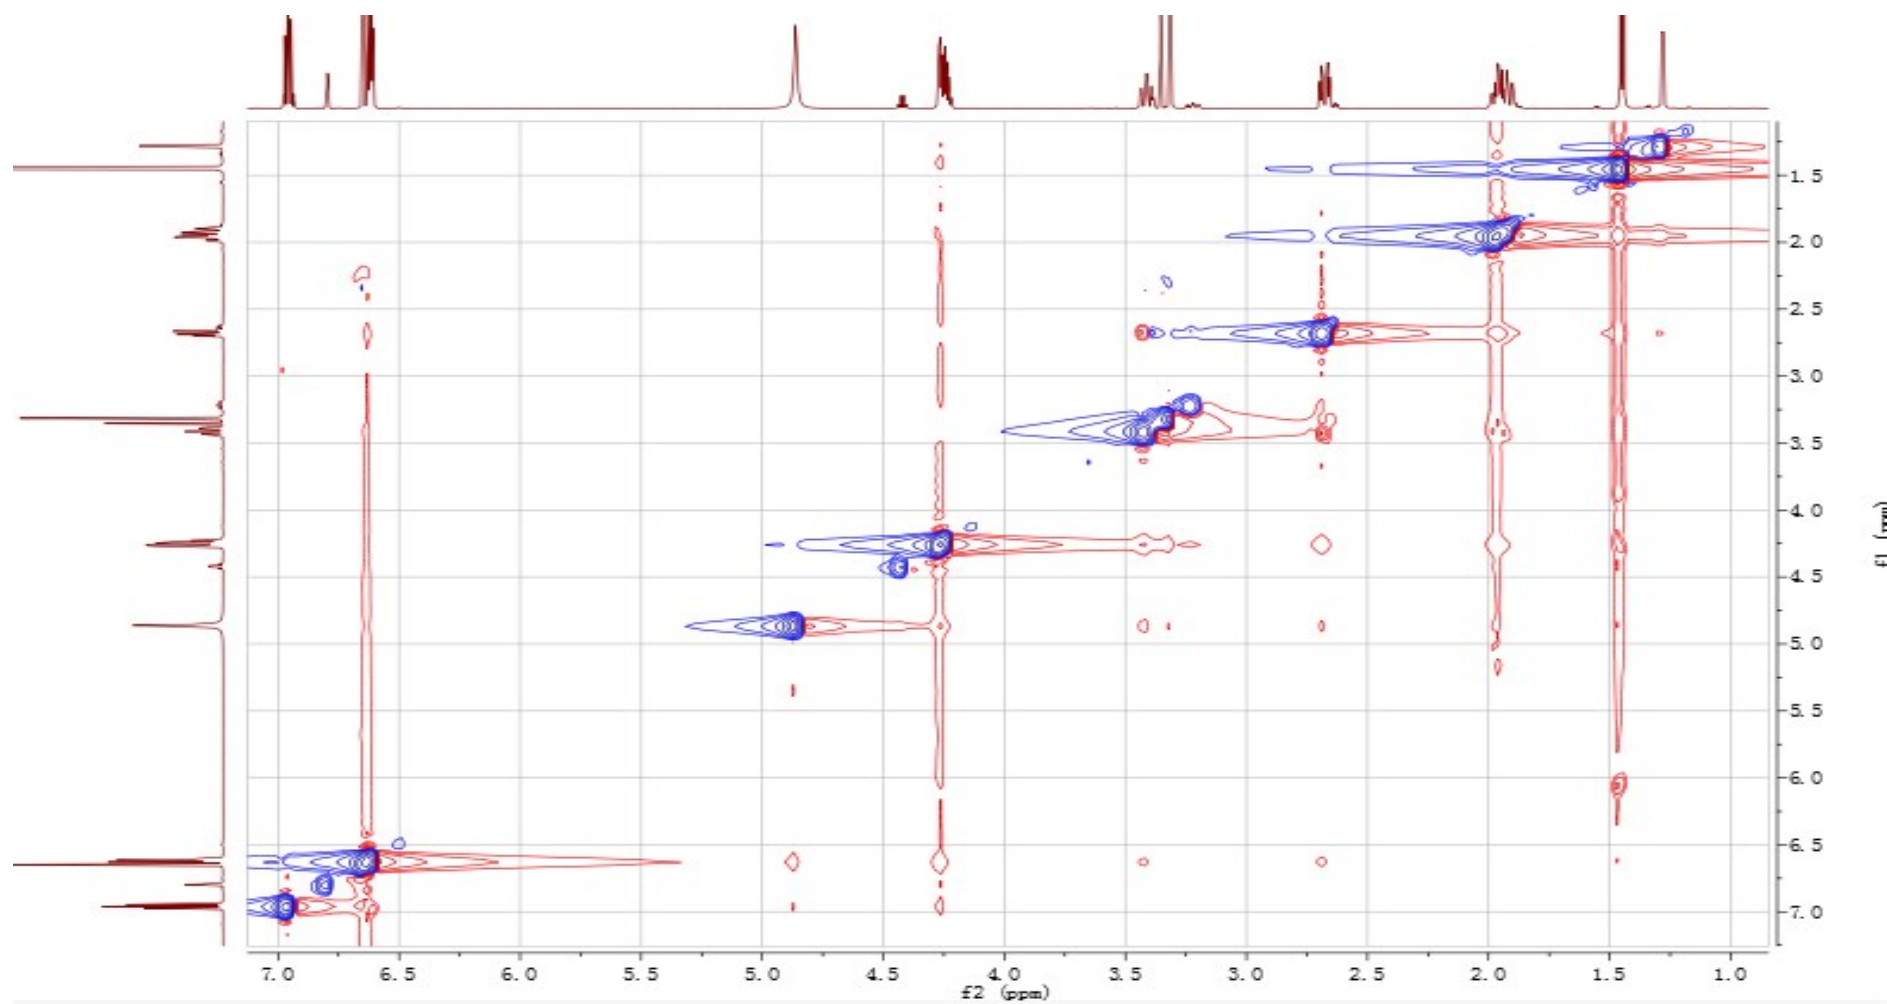

Figure S23. NOESY spectrum of the new compound **3**

## Mass Spectrum SmartFormula Report

|                      |                                                     |                  |                      |              |
|----------------------|-----------------------------------------------------|------------------|----------------------|--------------|
| <b>Analysis Info</b> |                                                     | Acquisition Date | 7/11/2018 3:04:31 PM |              |
| Analysis Name        | D:\Data\MS\data\201807\yangbin_L17_pos_34_01_5126.d | Operator         | SCSIO                |              |
| Method               | LC_Direct Infusion_pos_70-500mz.m                   | Instrument       | maXis                | 255552.00029 |
| Sample Name          | yangbin_L17_pos                                     |                  |                      |              |
| Comment              |                                                     |                  |                      |              |

|                              |          |                      |          |                  |           |
|------------------------------|----------|----------------------|----------|------------------|-----------|
| <b>Acquisition Parameter</b> |          |                      |          |                  |           |
| Source Type                  | ESI      | Ion Polarity         | Positive | Set Nebulizer    | 0.4 Bar   |
| Focus                        | Active   | Set Capillary        | 4500 V   | Set Dry Heater   | 180 °C    |
| Scan Begin                   | 70 m/z   | Set End Plate Offset | -500 V   | Set Dry Gas      | 4.0 l/min |
| Scan End                     | 1500 m/z | Set Charging Voltage | 0 V      | Set Divert Valve | Waste     |
|                              |          | Set Corona           | 0 nA     | Set APCI Heater  | 0 °C      |

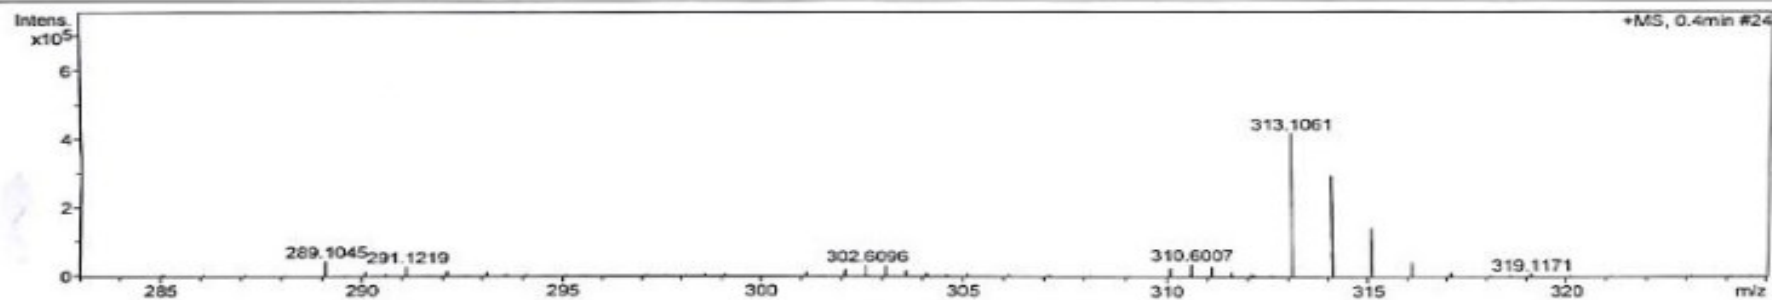

| Meas. m/z | # | Ion Formula | Score  | m/z      | err [ppm] | err [mDa] | mSigma | rdb | e <sup>-</sup> Conf | N-Rule |
|-----------|---|-------------|--------|----------|-----------|-----------|--------|-----|---------------------|--------|
| 291.1219  | 1 | C16H19O5    | 100.00 | 291.1227 | 2.8       | 0.8       | 290.3  | 7.5 | even                | ok     |
| 313.1061  | 1 | C16H15NaO5  | 100.00 | 313.1046 | -4.7      | -1.5      | 353.0  | 7.5 | even                | ok     |

Figure S24. HRESI-MS spectrum of the new compound 4

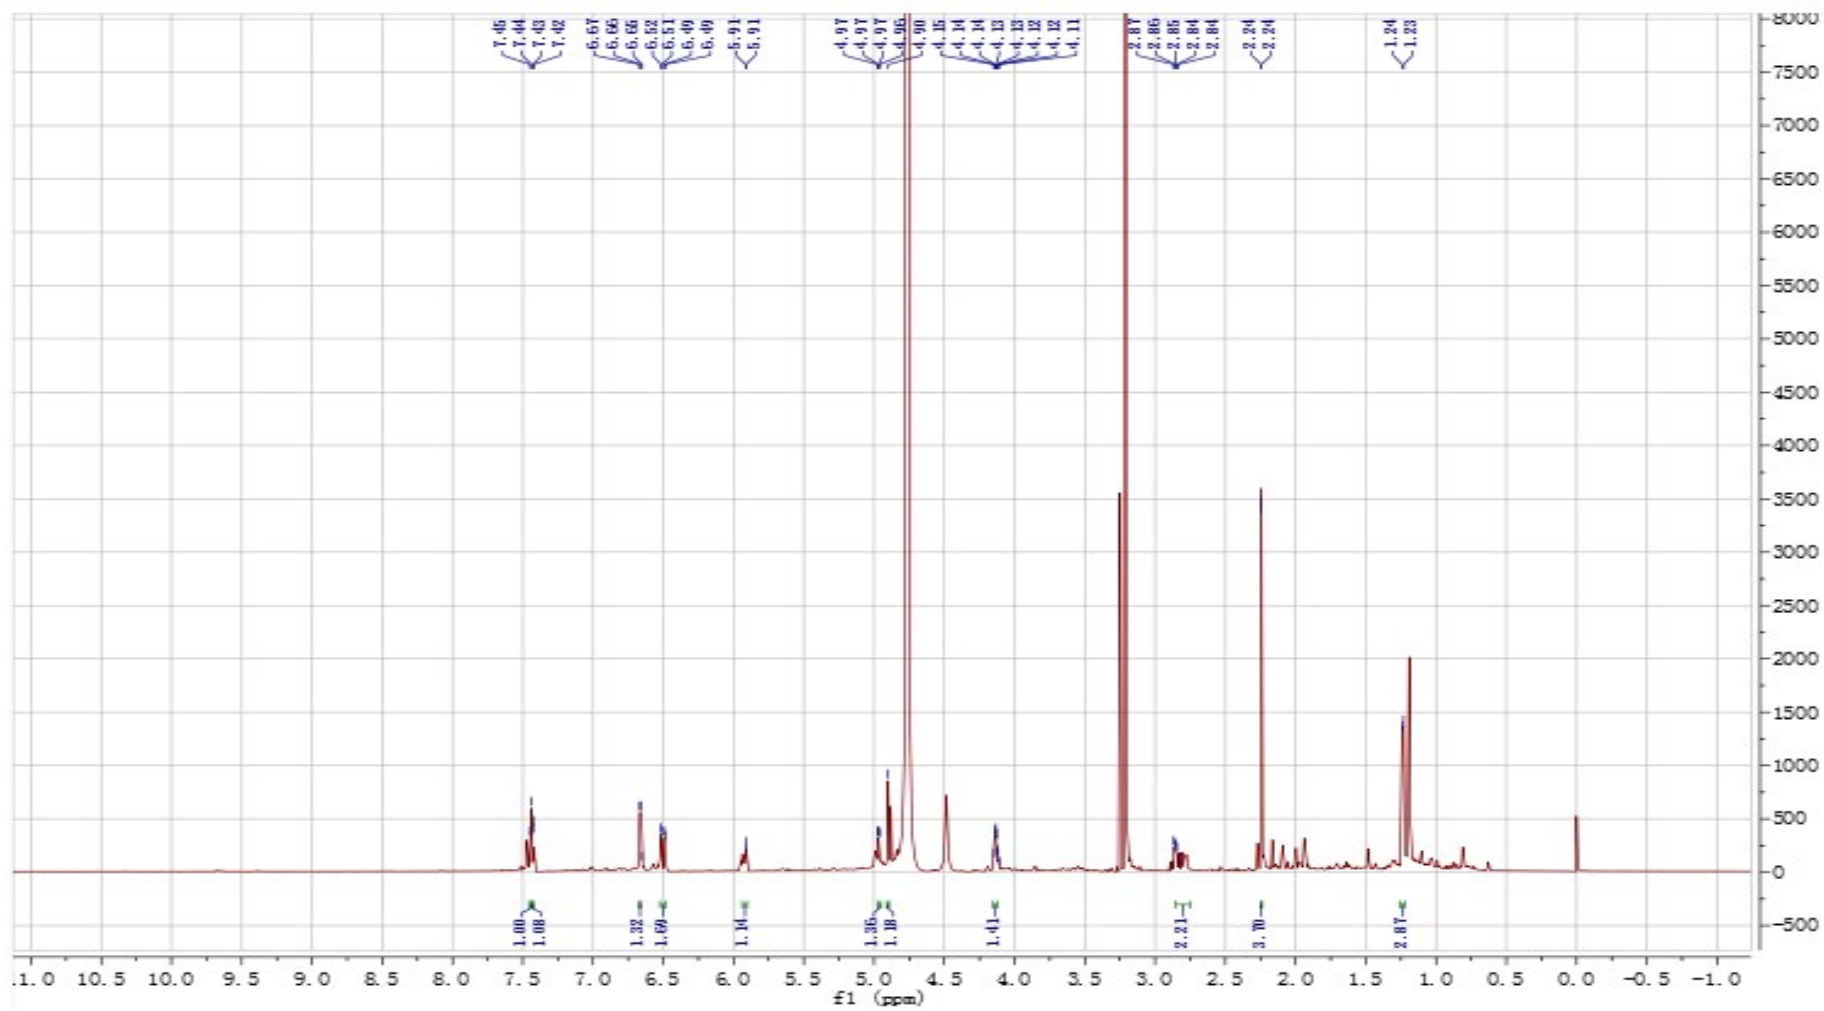

Figure S25.  $^1\text{H}$  NMR (600 MHz,  $\text{CD}_3\text{OD}$ ) spectrum of the new compound 4

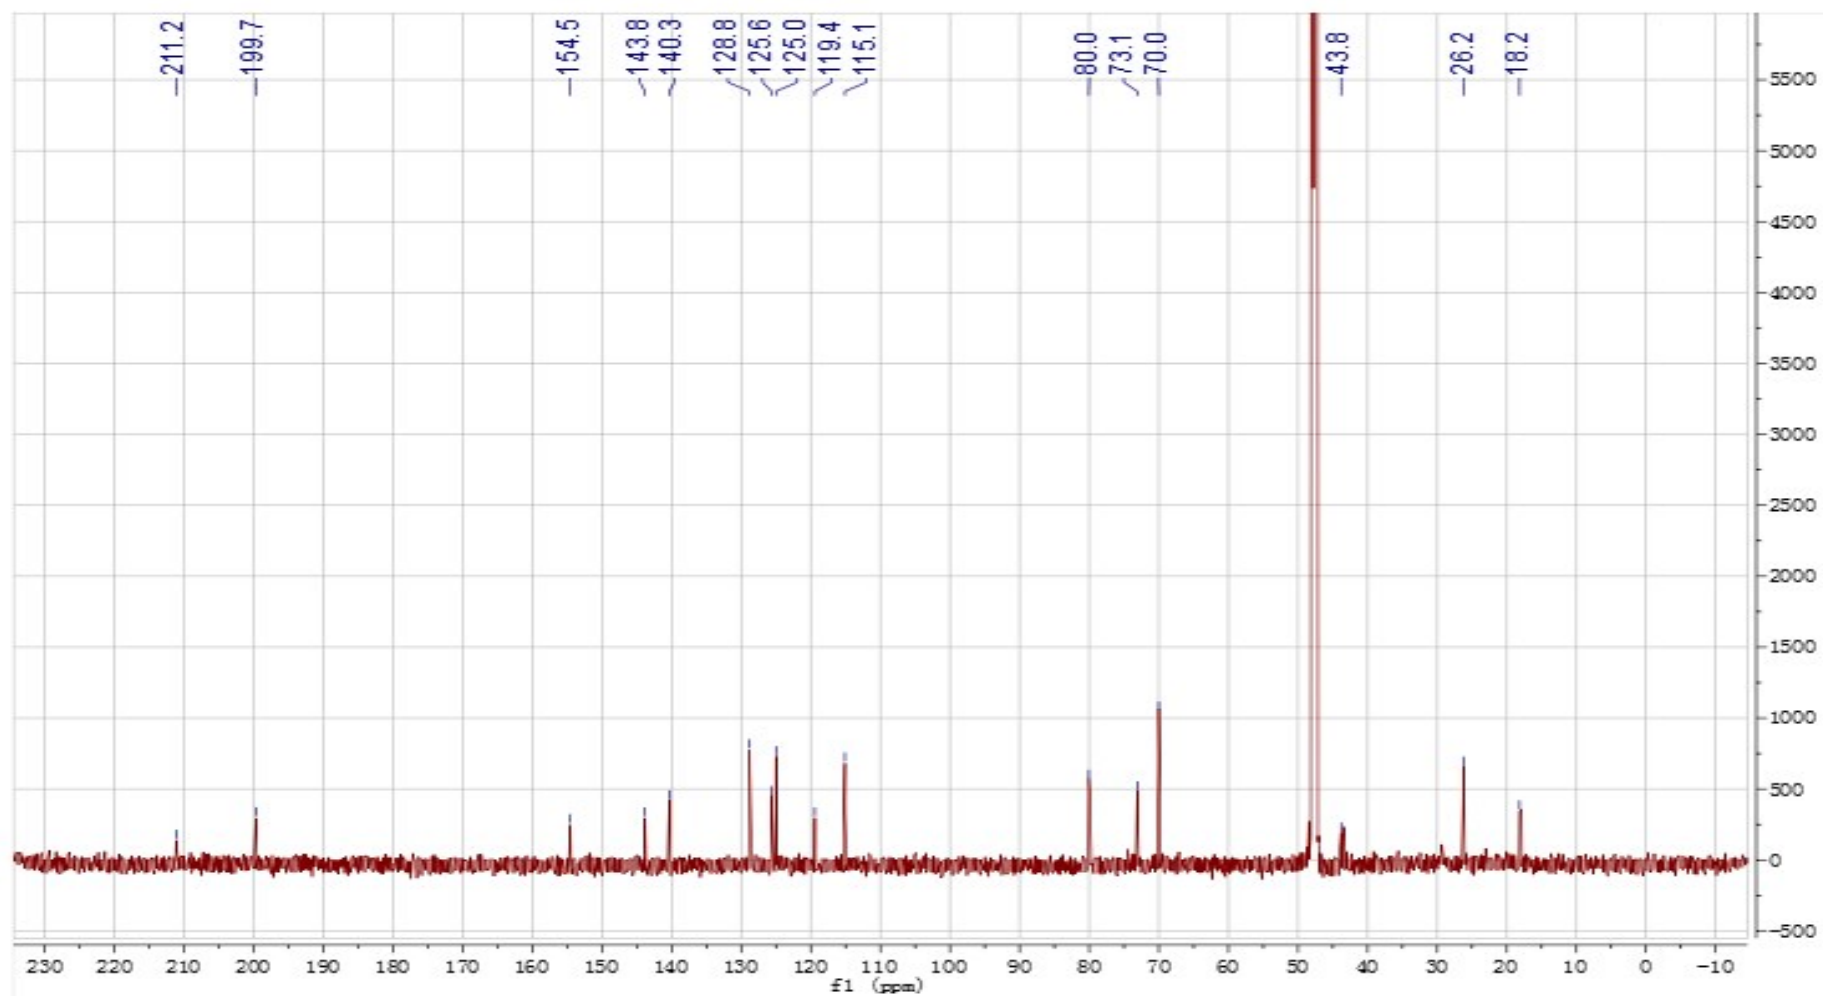

Figure S26.  $^{13}\text{C}$  NMR (150 MHz,  $\text{CD}_3\text{OD}$ ) spectrum of the new compound **4**

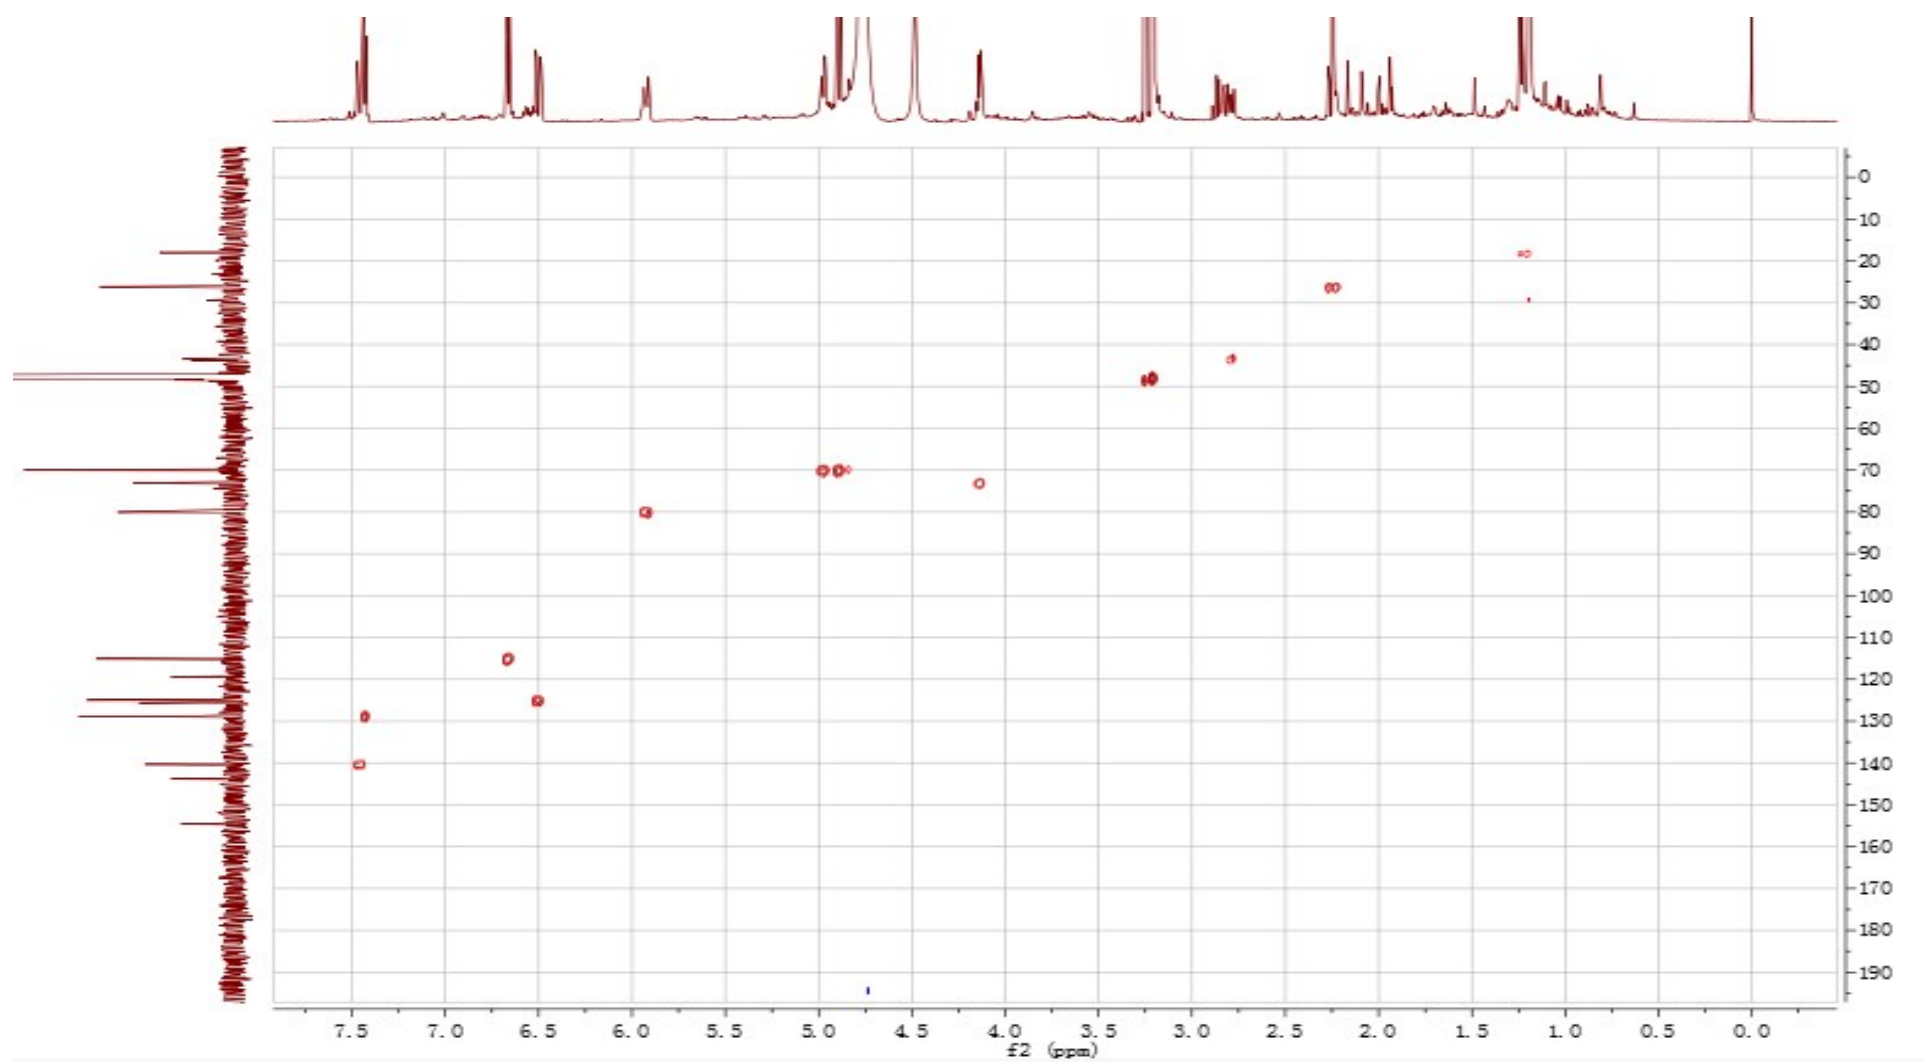

Figure S27. HSQC spectrum of the new compound 4



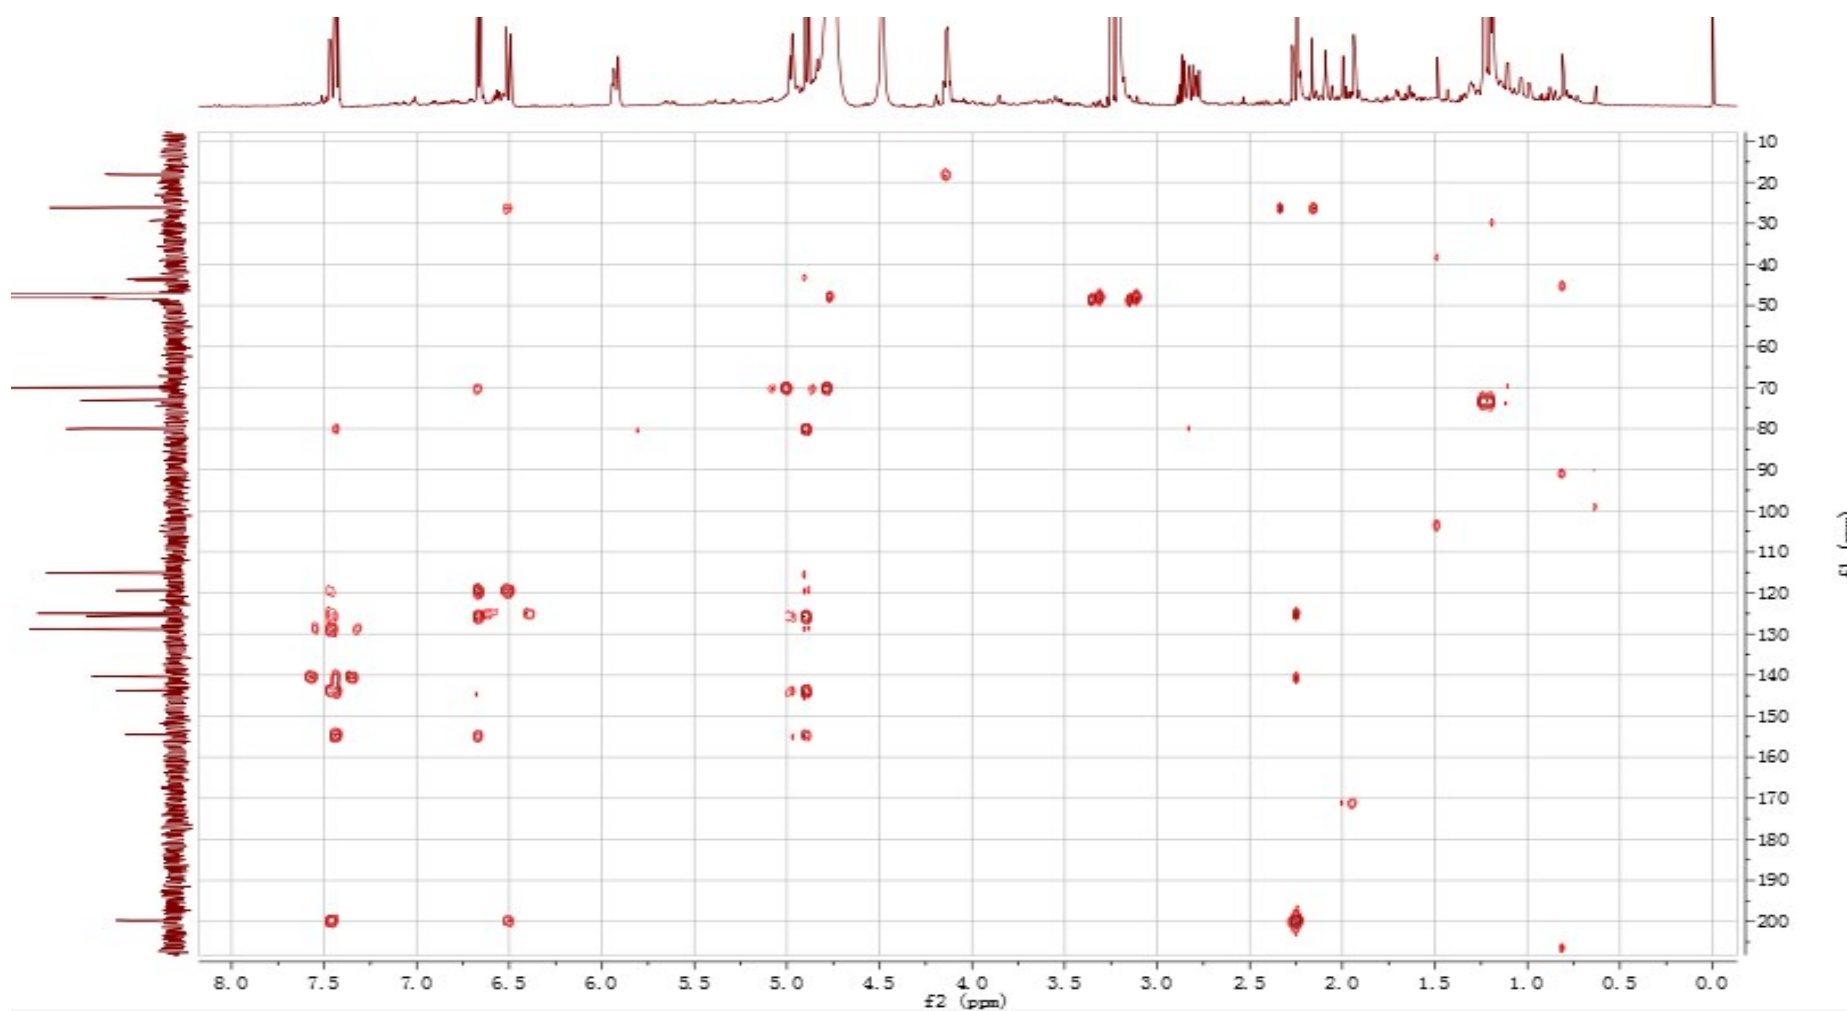

Figure S28. HMBC spectrum of the new compound 4

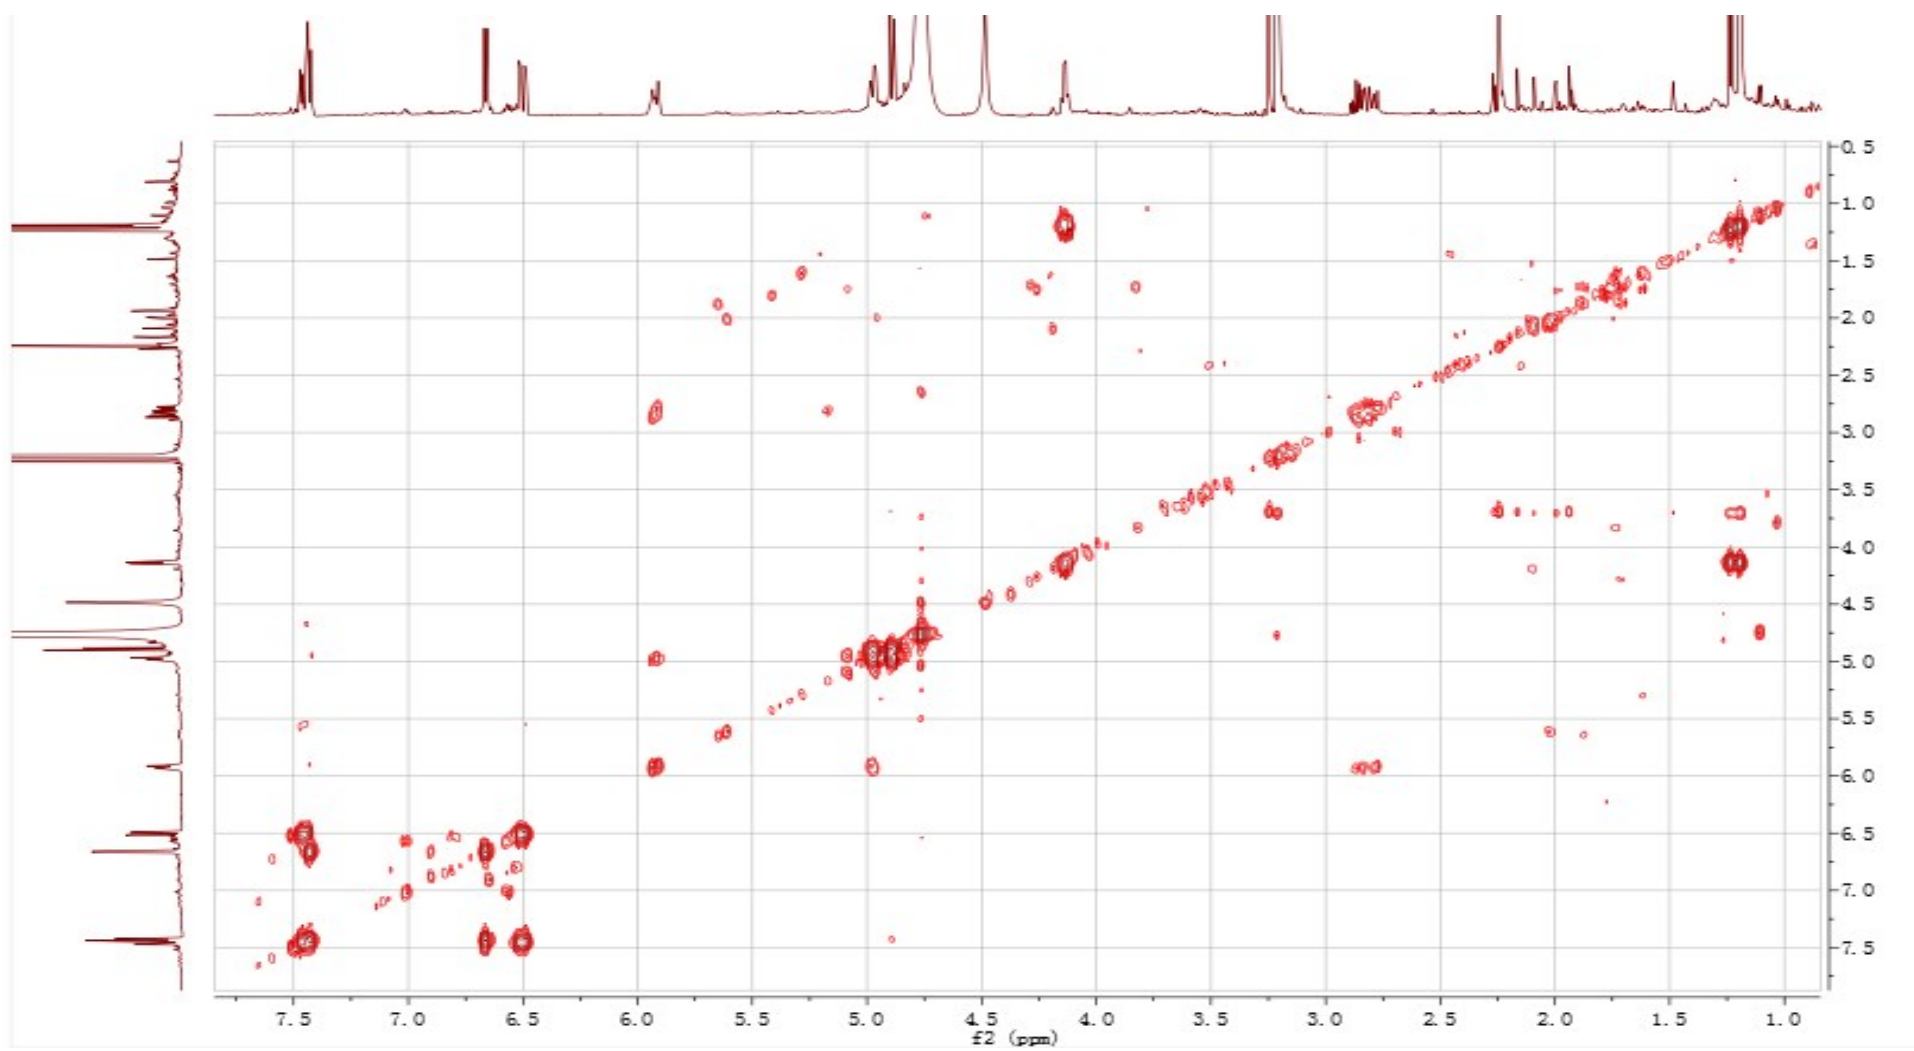

Figure S29. COSY spectrum of the new compound 4

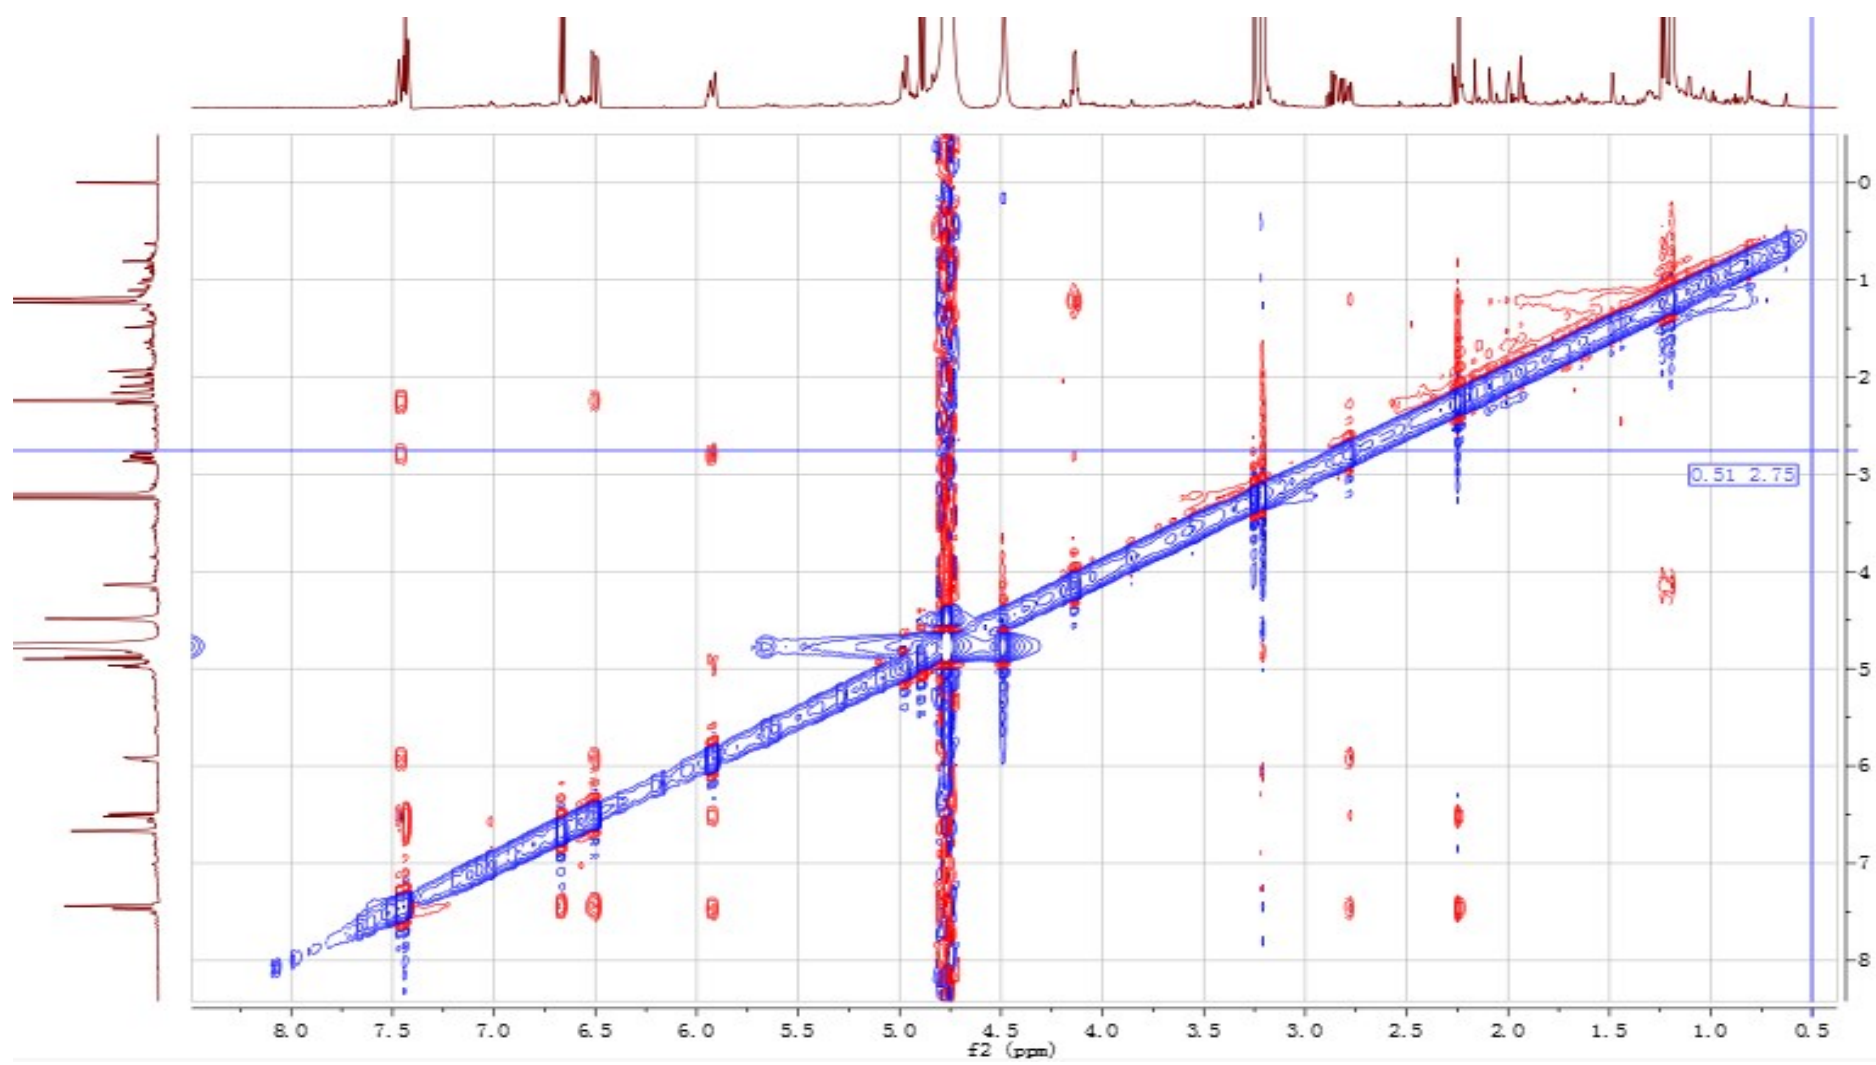

Figure S30. NOESY spectrum of the new compound 4

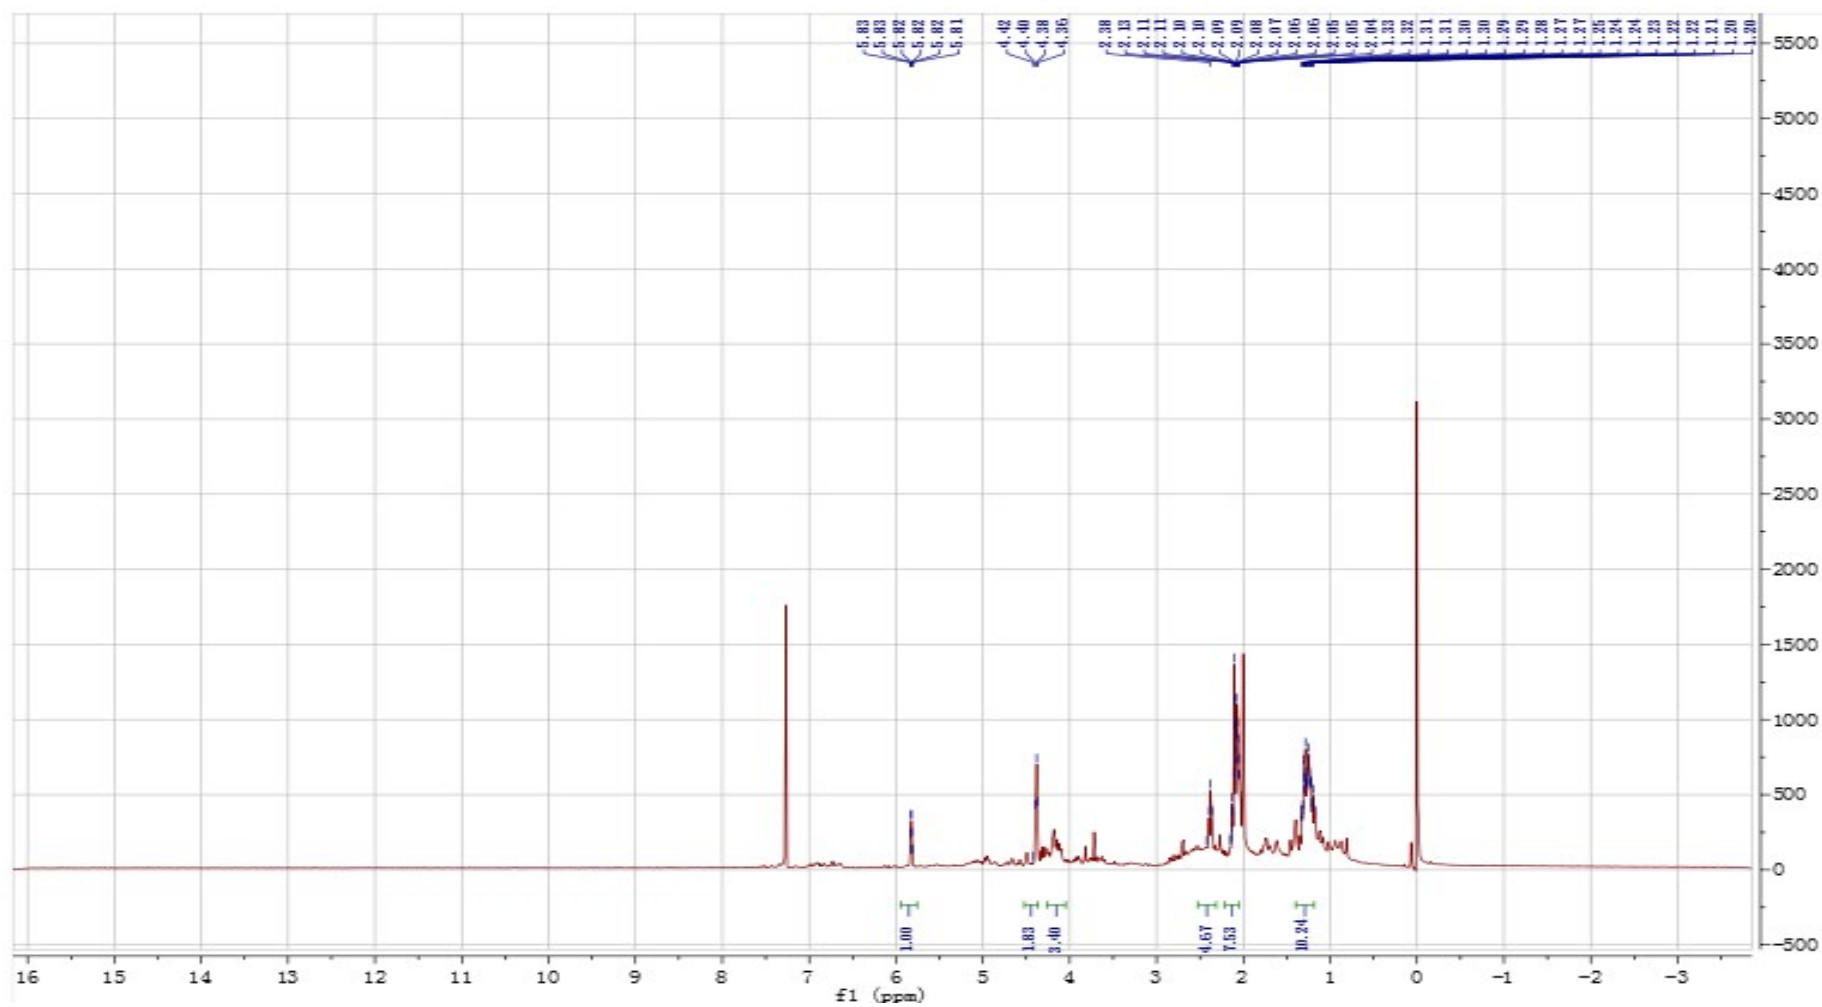

Figure S31.  $^1\text{H}$  NMR (600 MHz,  $\text{CDCl}_3$ ) spectrum of the compound **5**

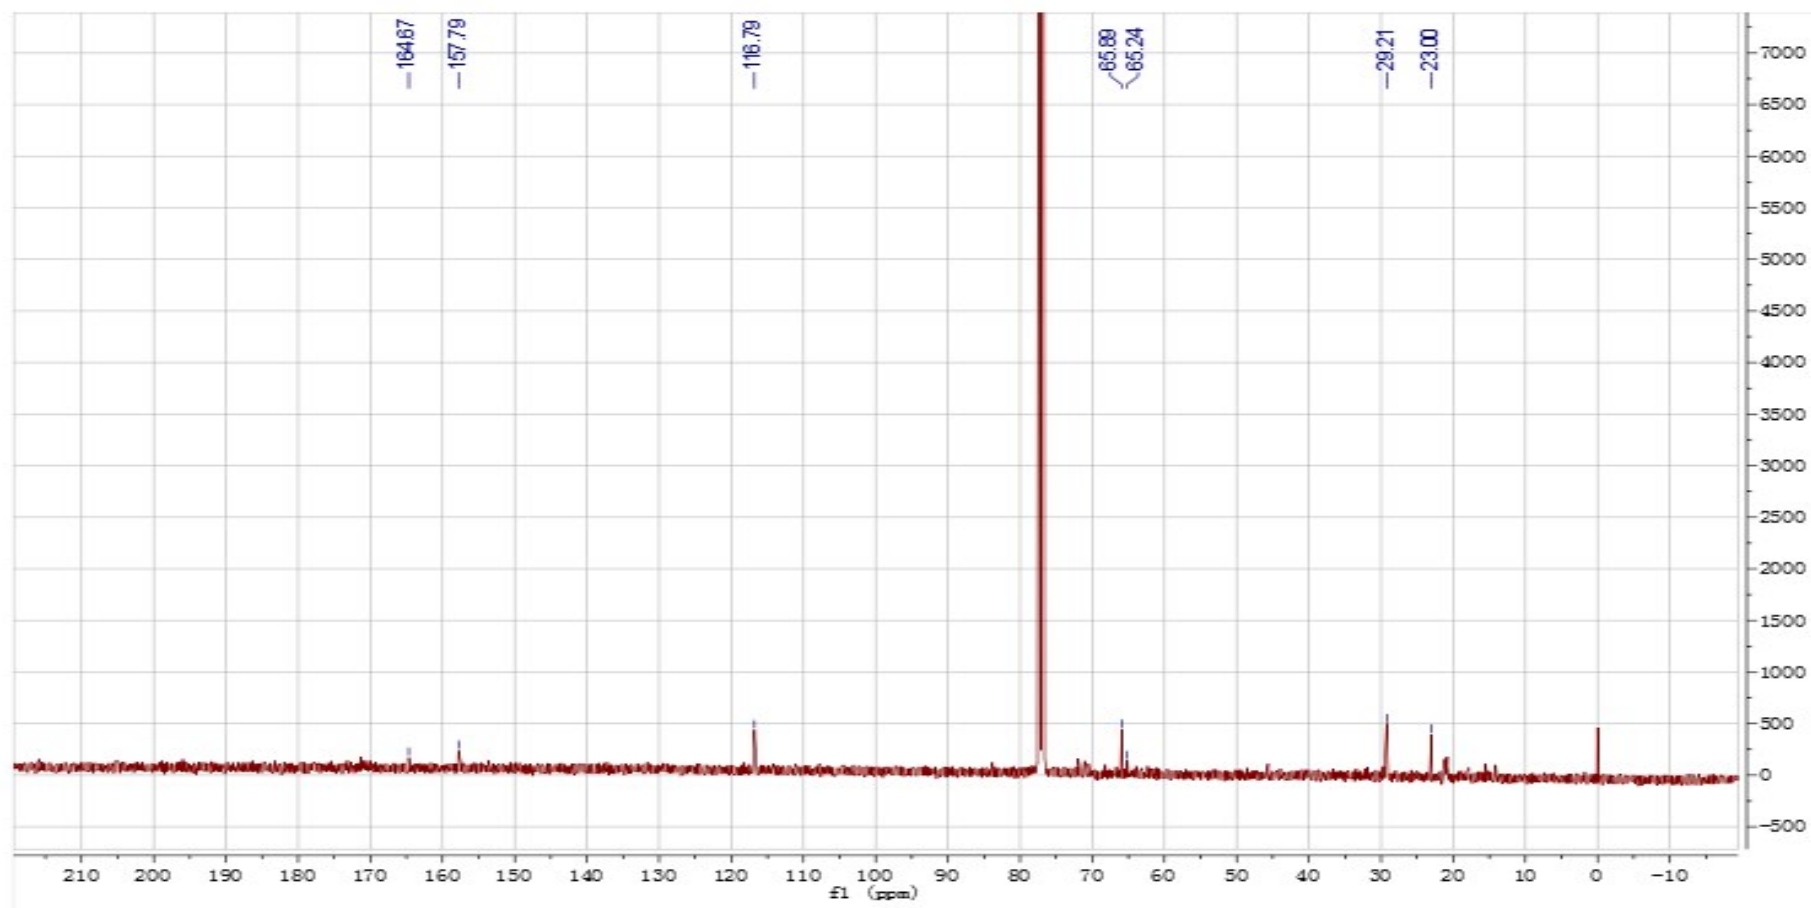

Figure S32.  $^{13}\text{C}$  NMR (150 MHz,  $\text{CDCl}_3$ ) spectrum of the compound **5**

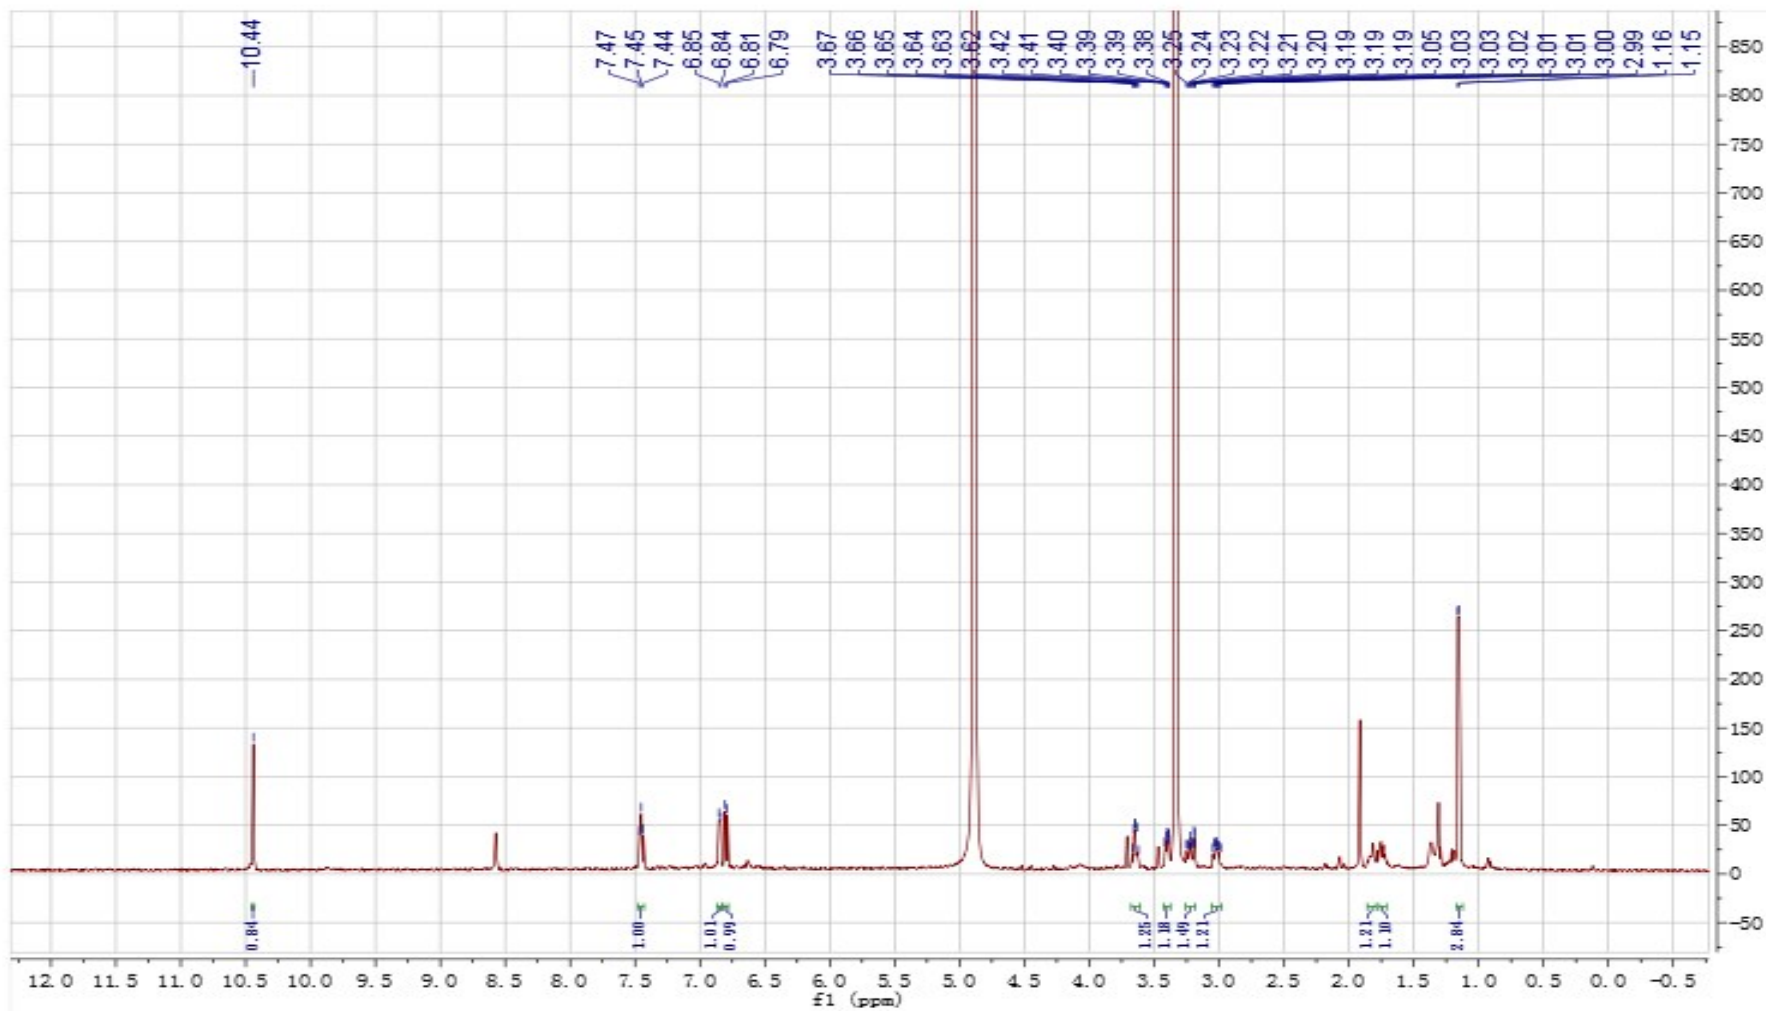

Figure S33.  $^1\text{H}$  NMR (600 MHz,  $\text{CD}_3\text{OD}$ ) spectrum of the compound **6**

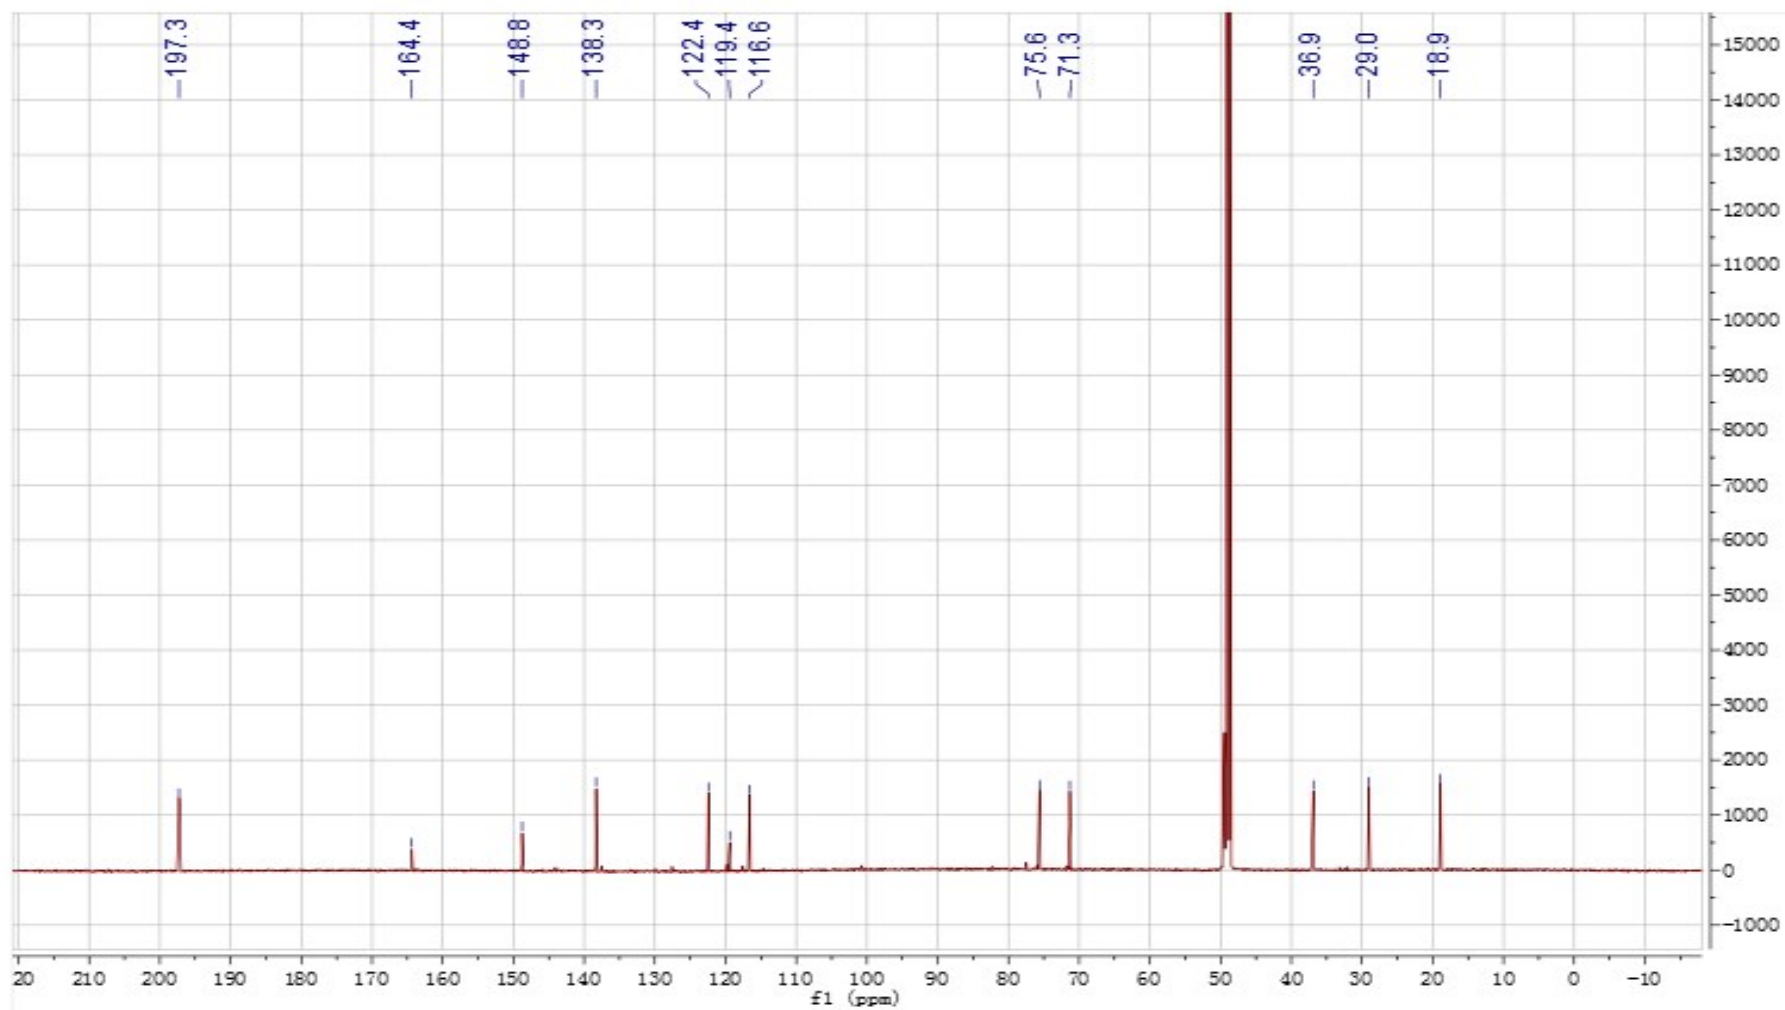

Figure S34.  $^{13}\text{C}$  NMR (150 MHz,  $\text{CD}_3\text{OD}$ ) spectrum of the compound **6**

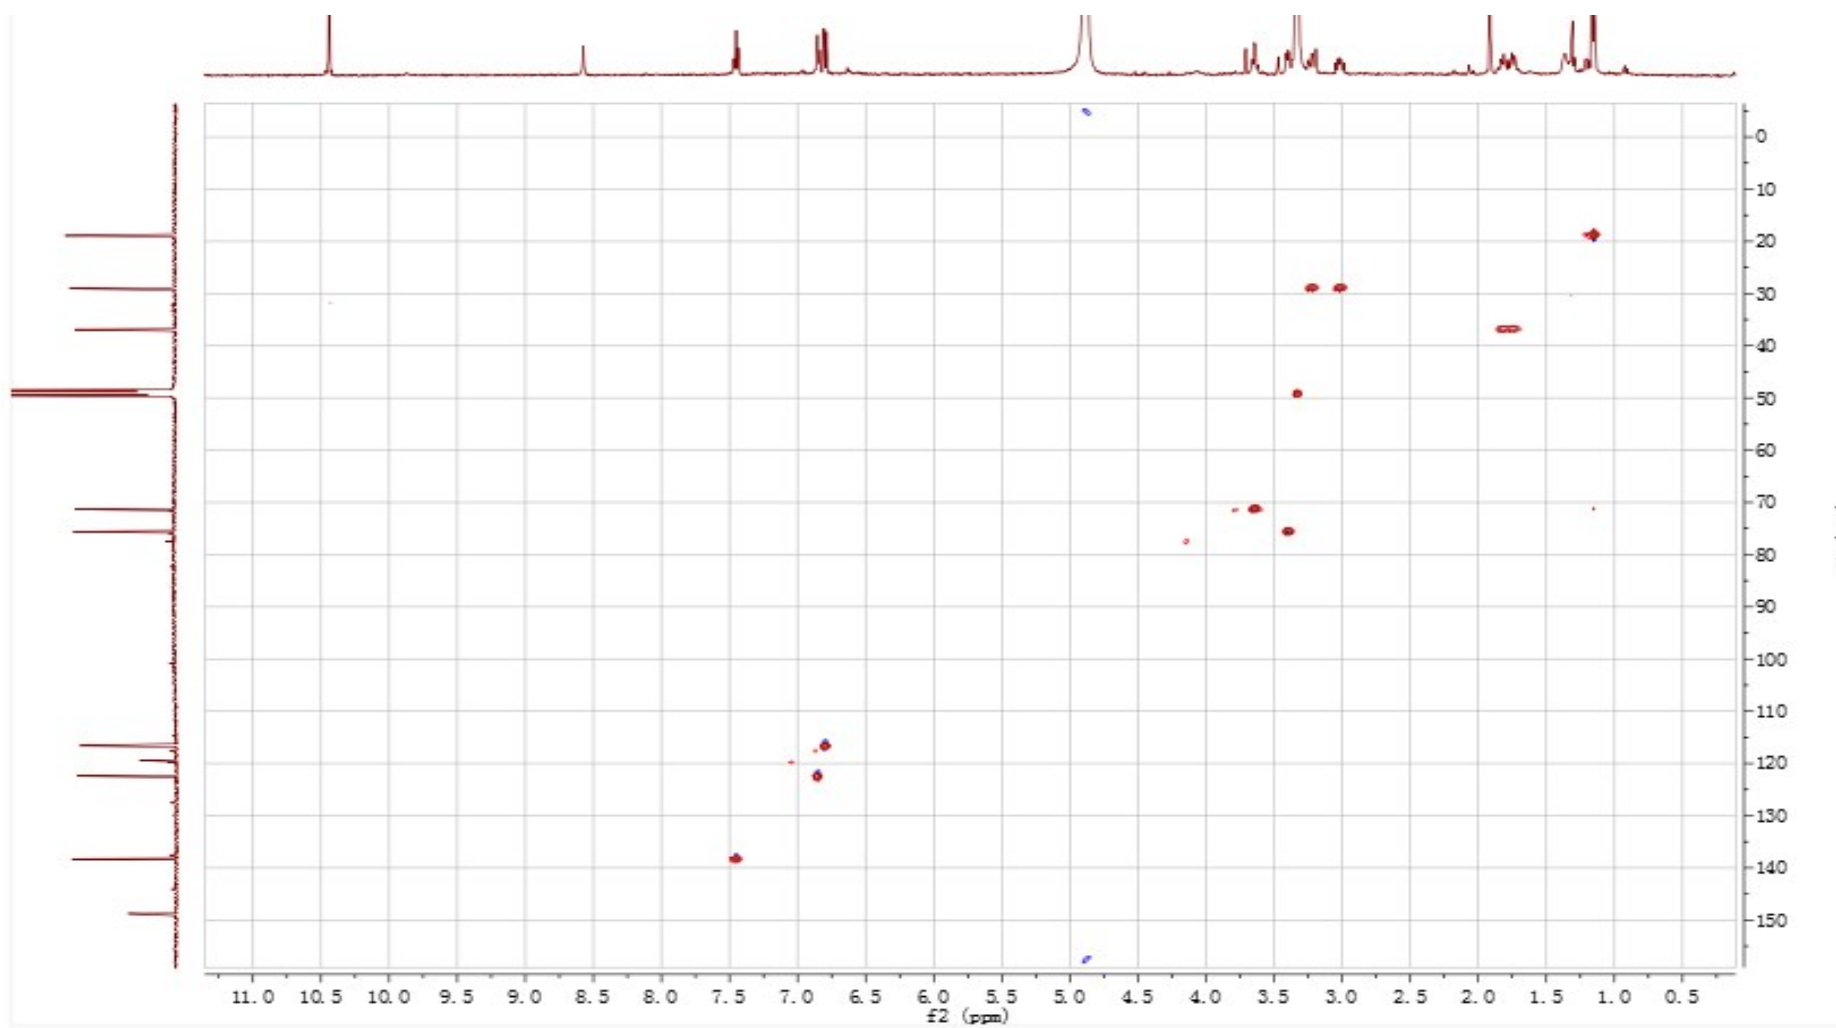

Figure S35. HSQC spectrum of the compound 6



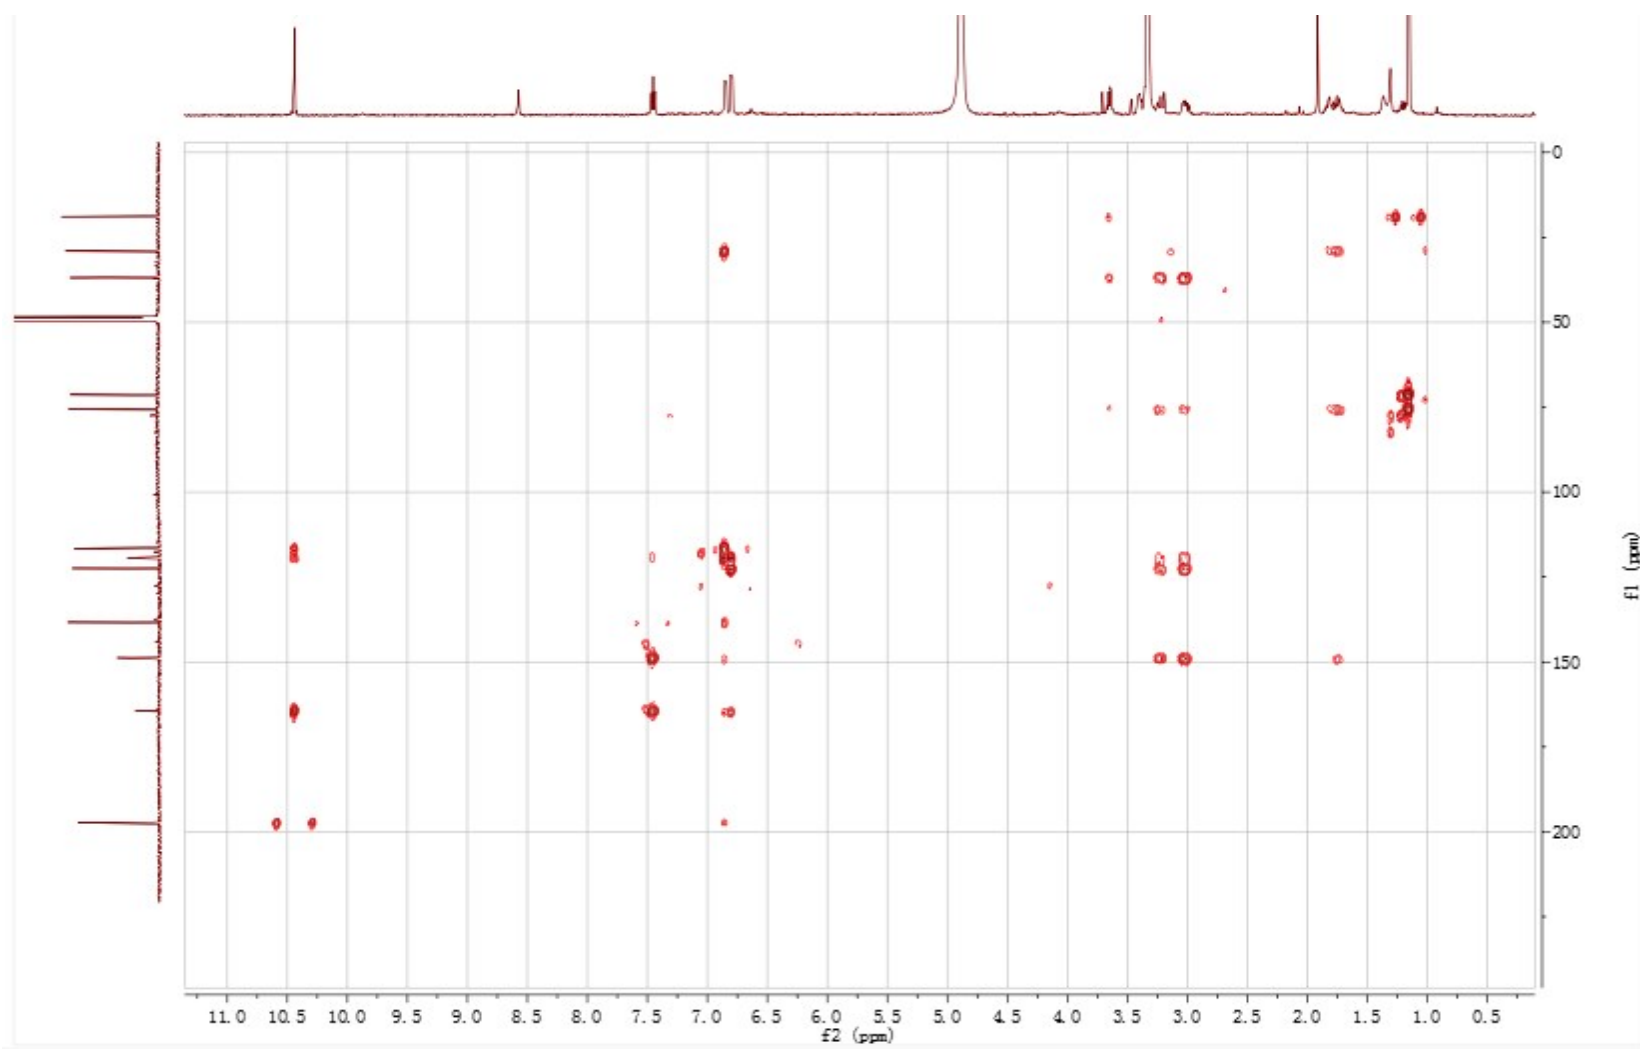

Figure S36. HMBC spectrum of the compound 6

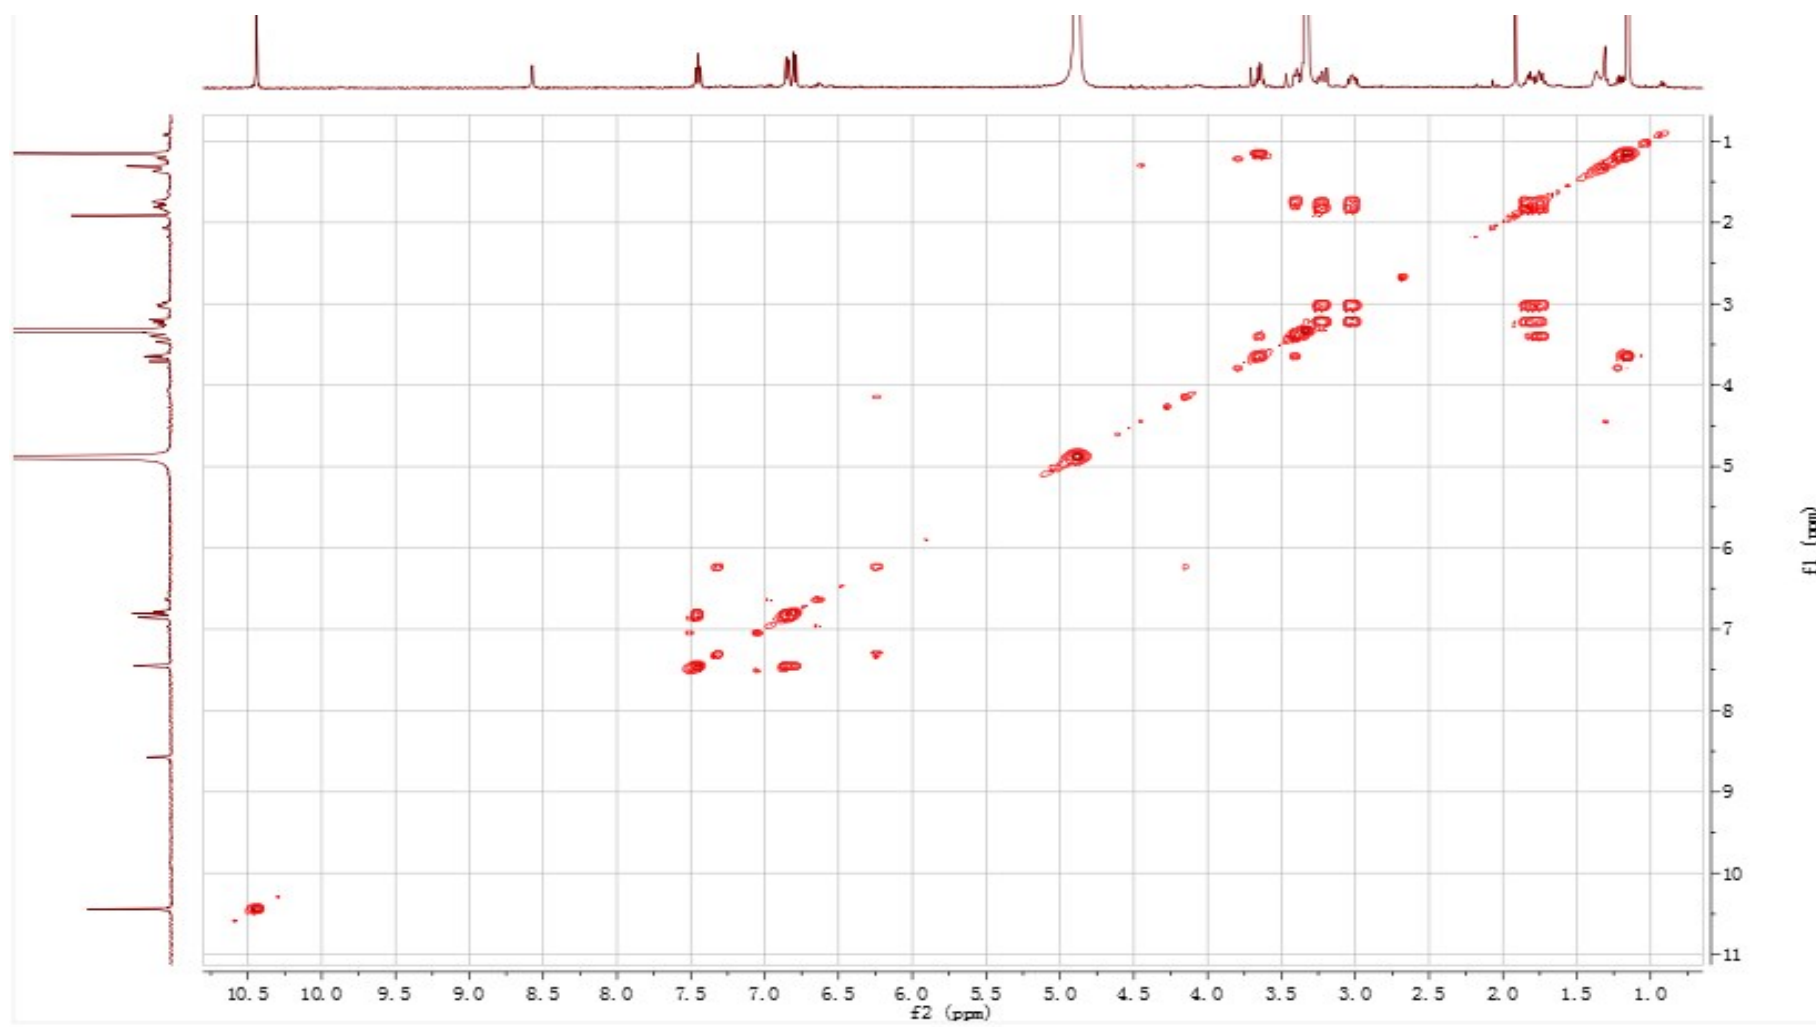

Figure S37. COSY spectrum of the compound **6**

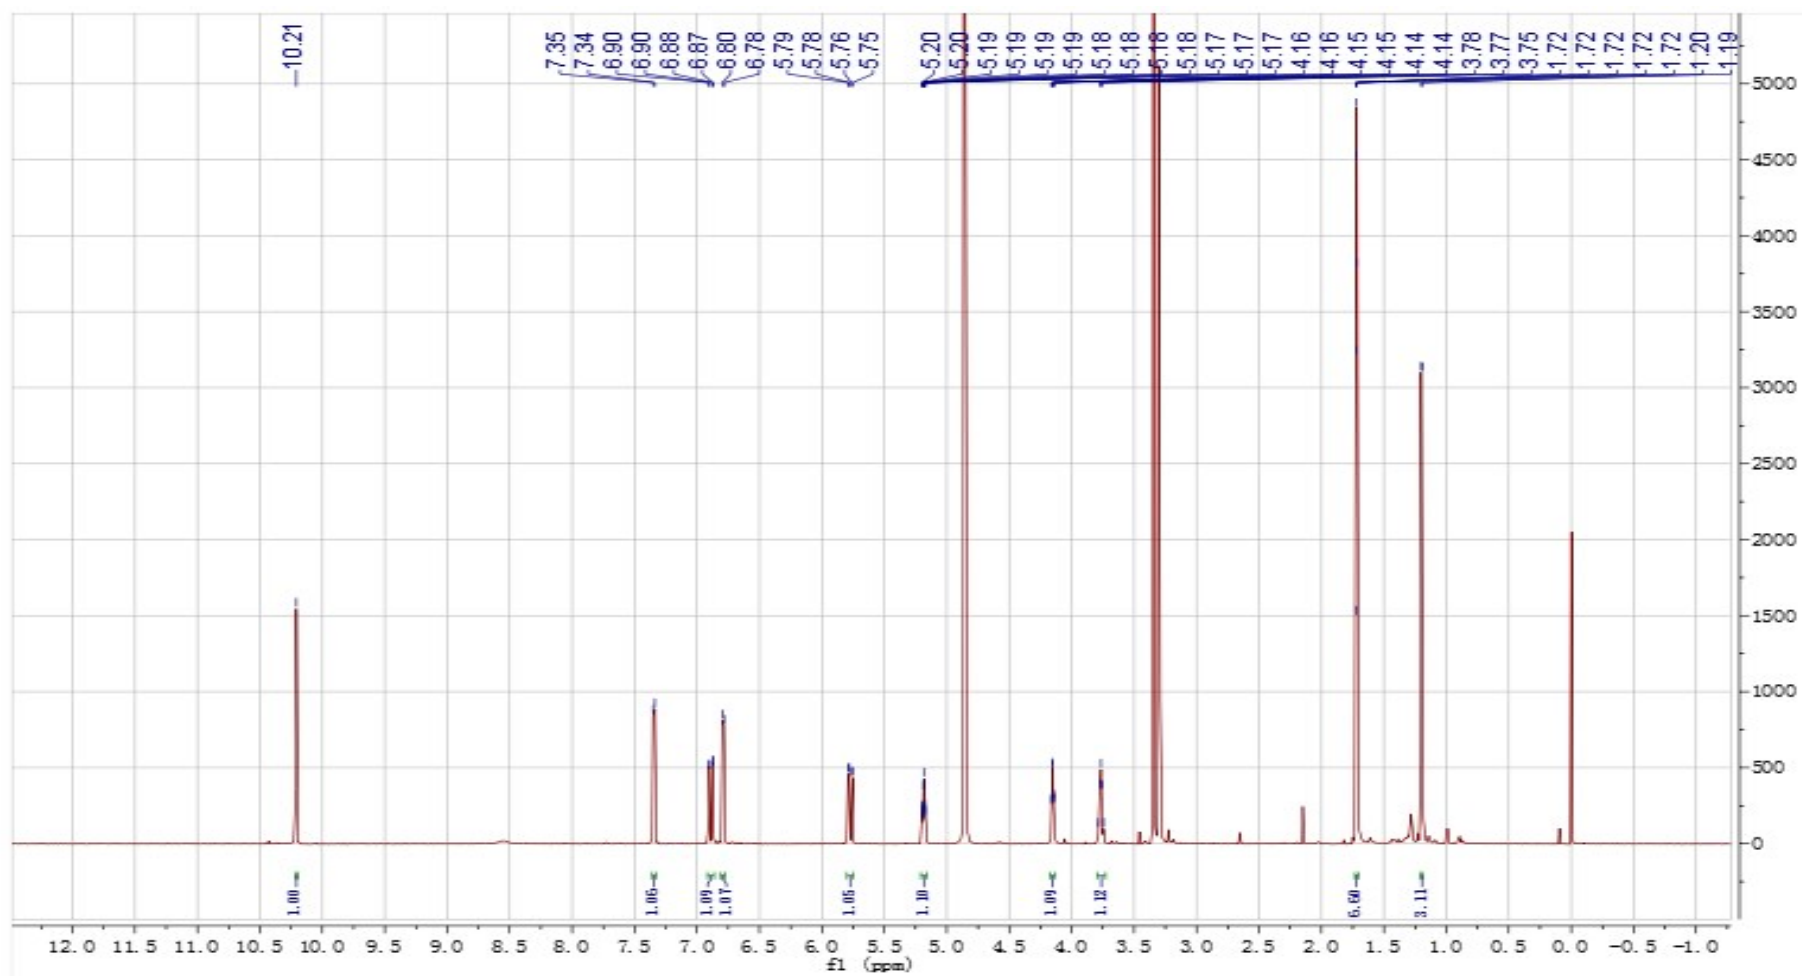

Figure S38.  $^1\text{H}$  NMR (600 MHz,  $\text{CD}_3\text{OD}$ ) spectrum of the compound 7

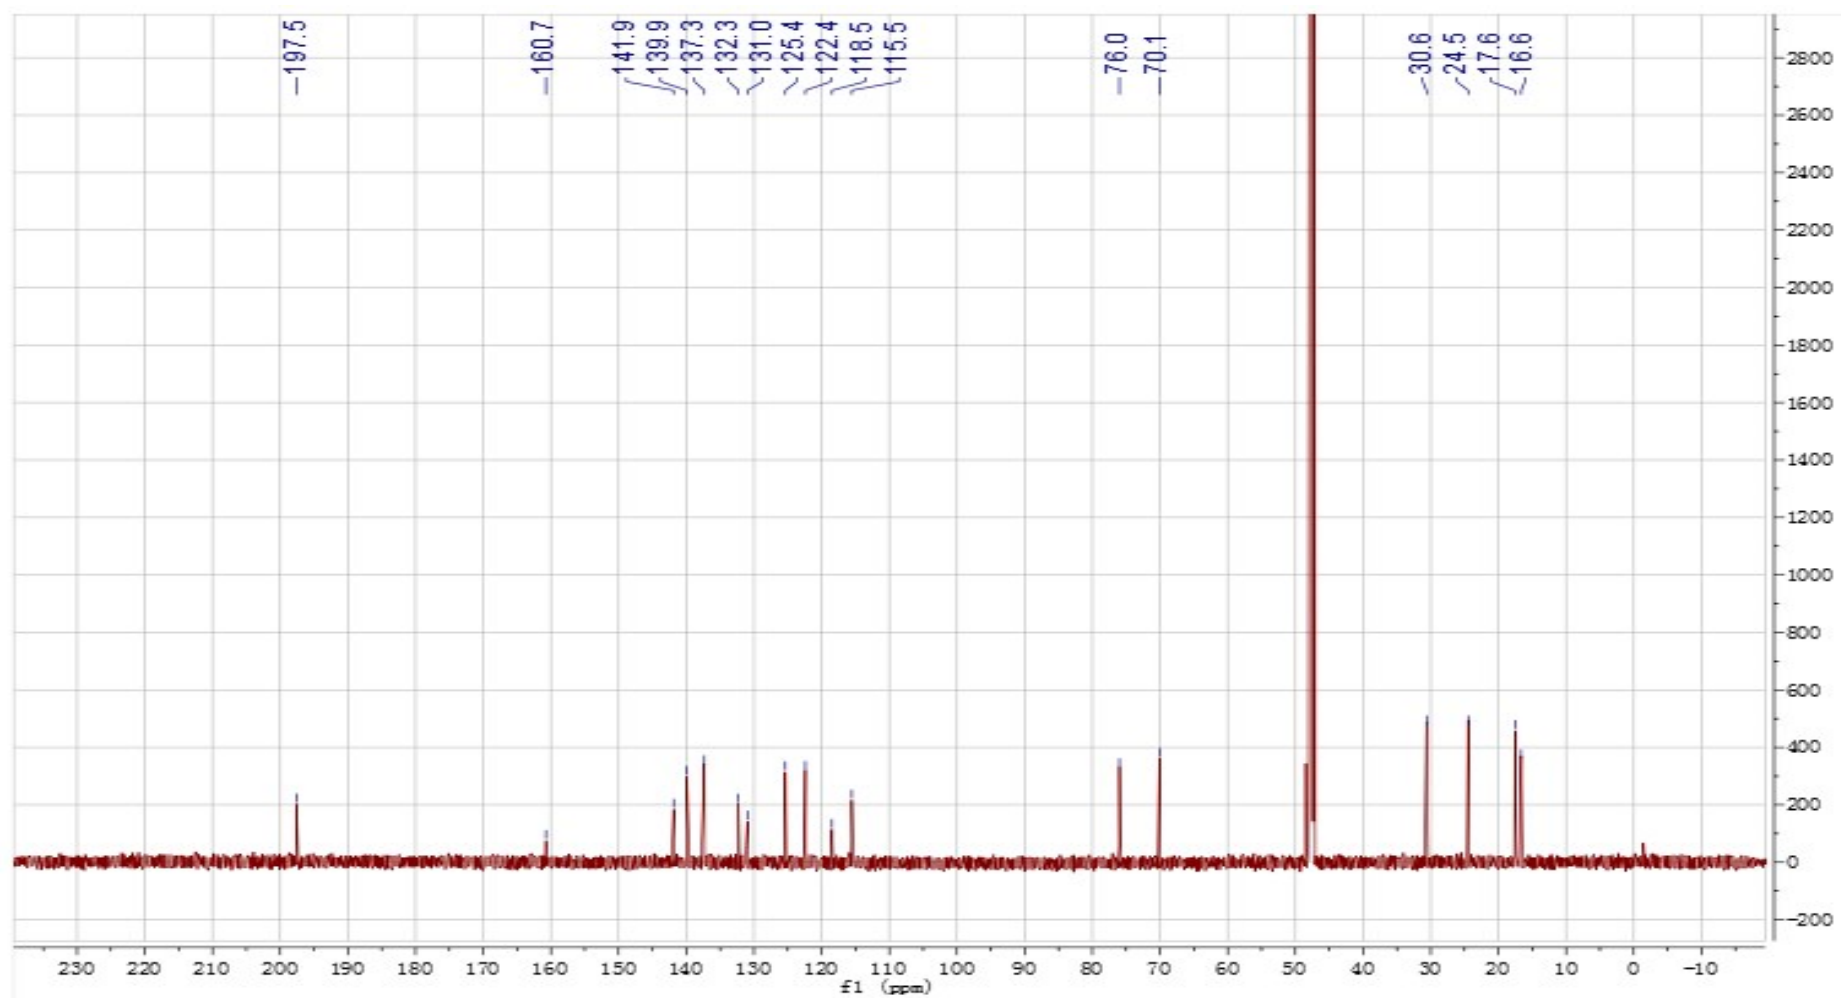

Figure S39.  $^{13}\text{C}$  NMR (150 MHz,  $\text{CD}_3\text{OD}$ ) spectrum of the compound 7

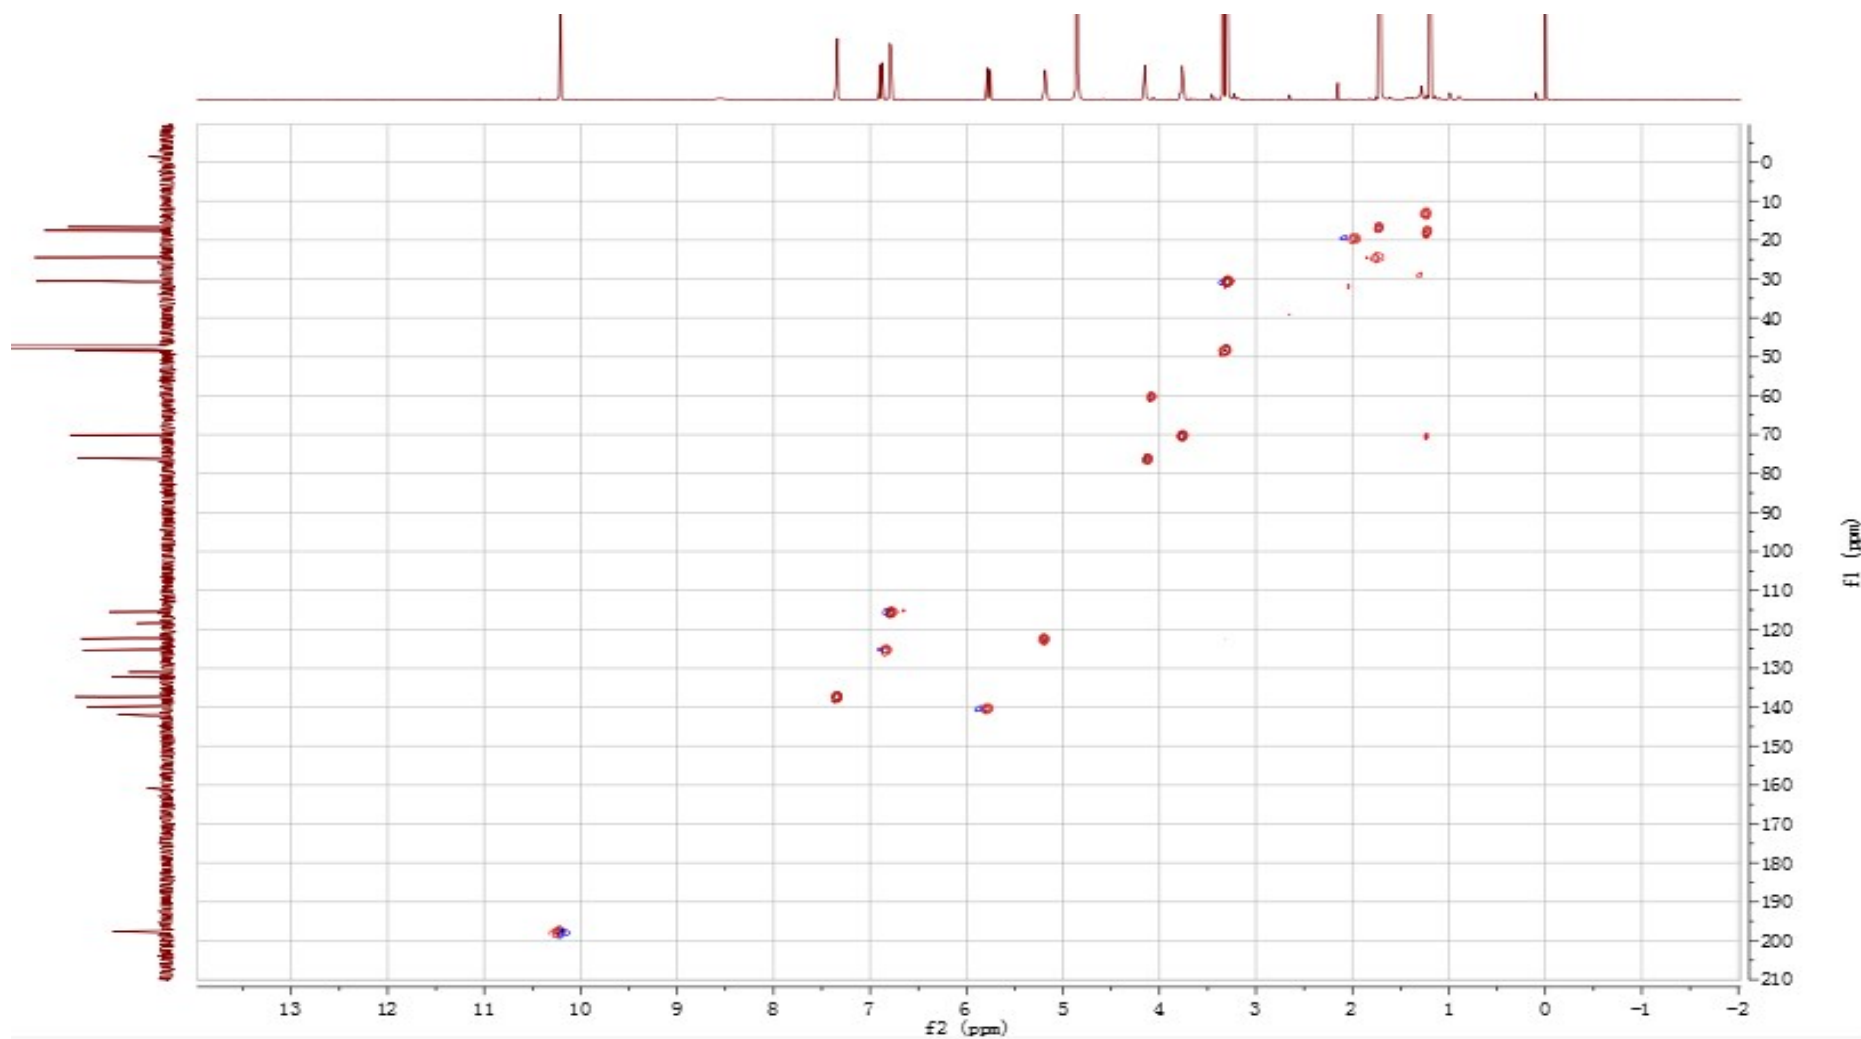

Figure S40. HSQC spectrum of the compound 7

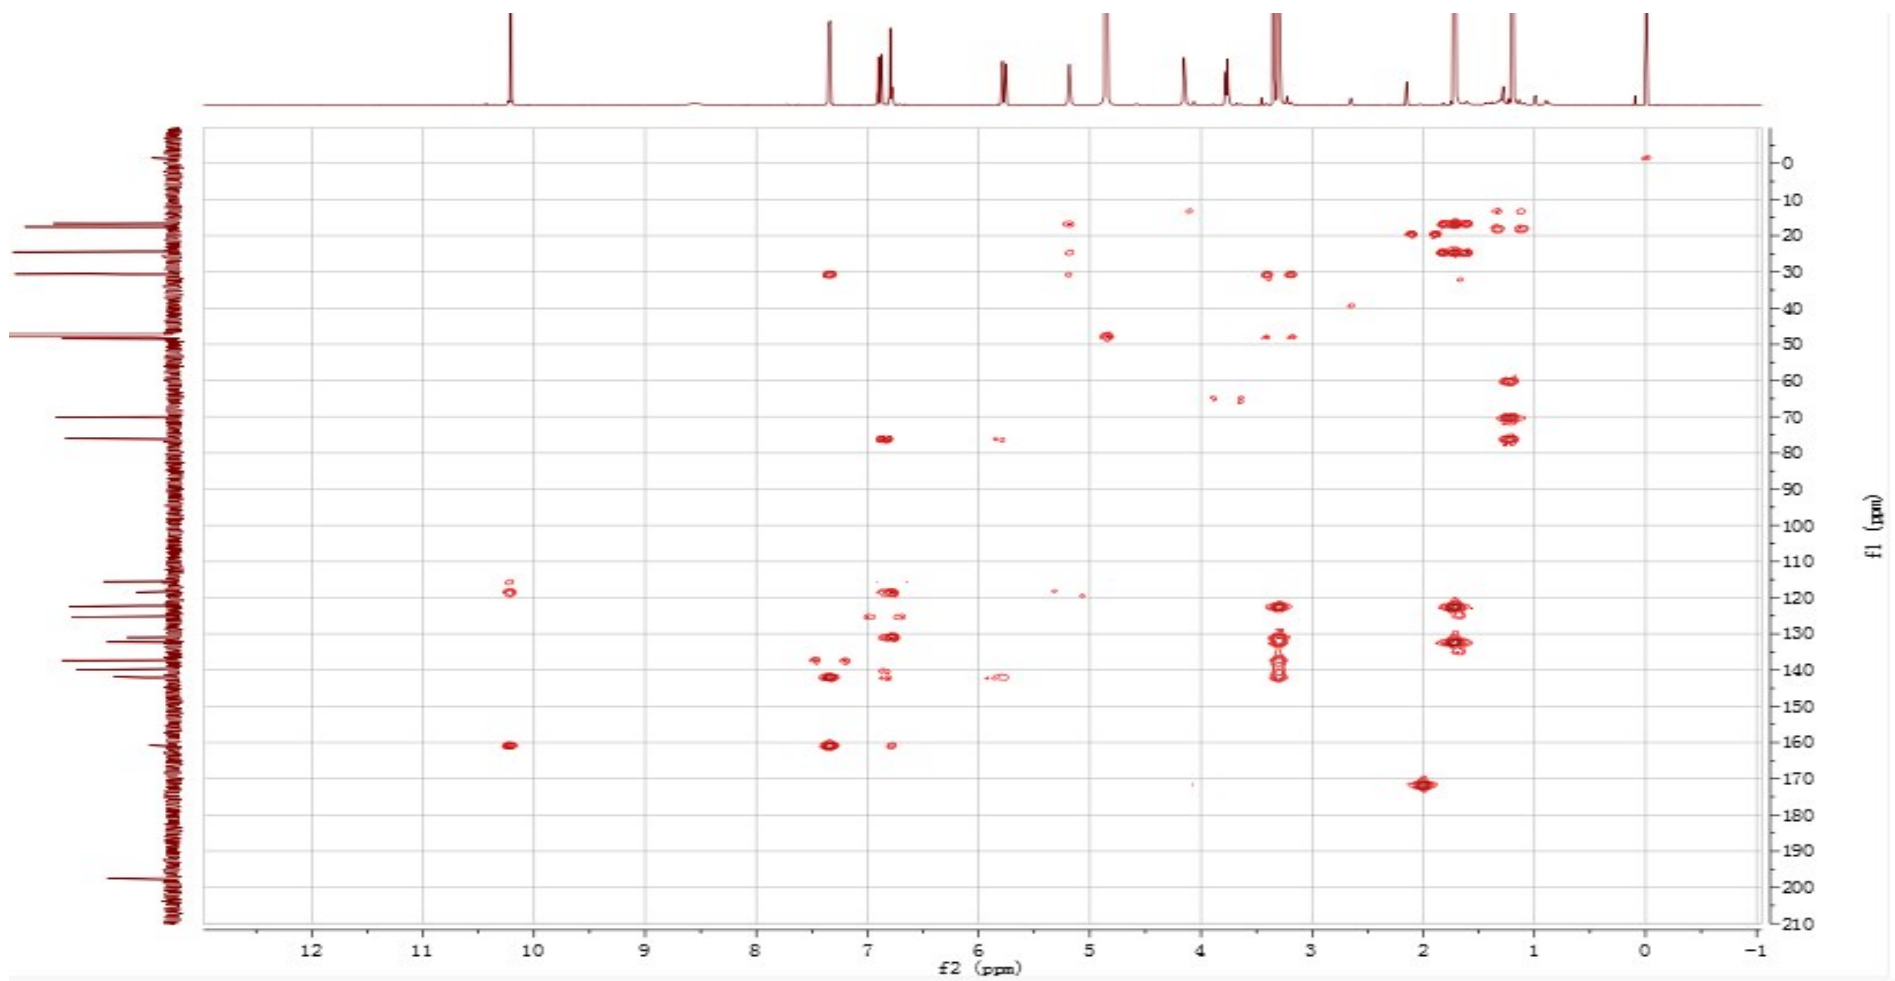

Figure S41. HMBC spectrum of the compound 7

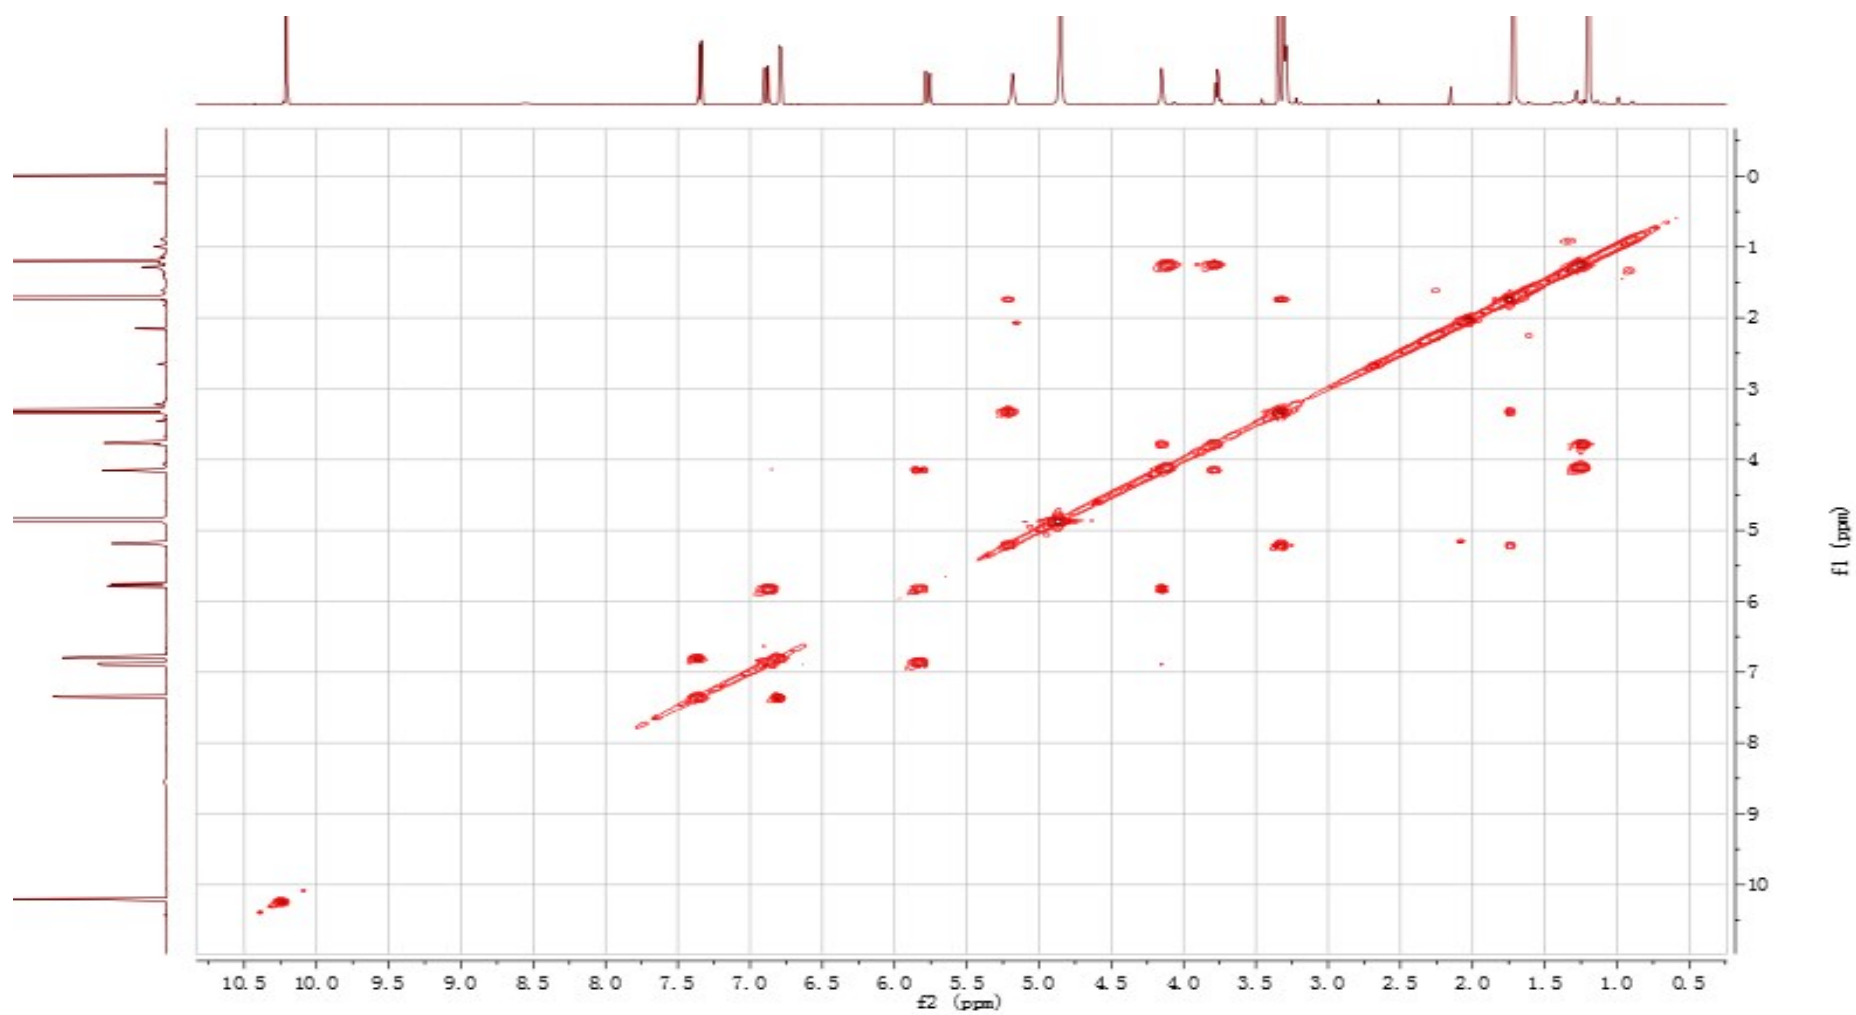

Figure S42. COSY spectrum of the compound 7

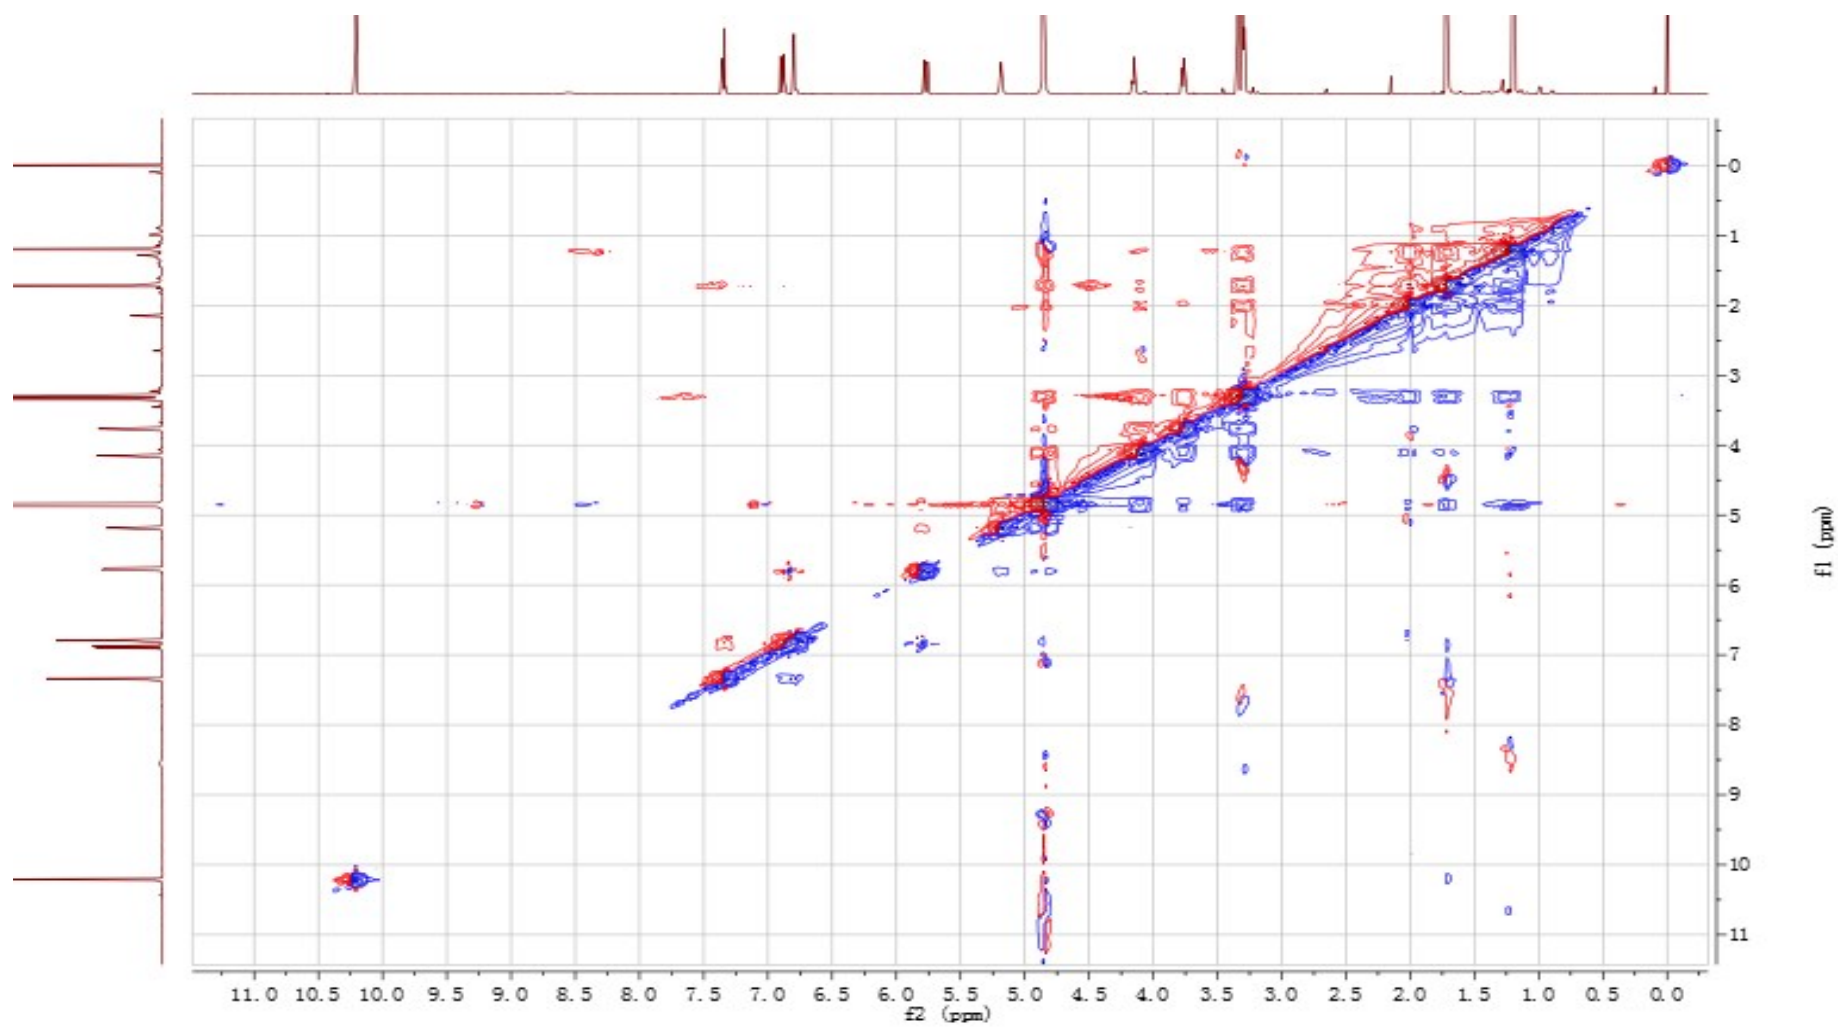

Figure S43. NOESY spectrum of the compound 7



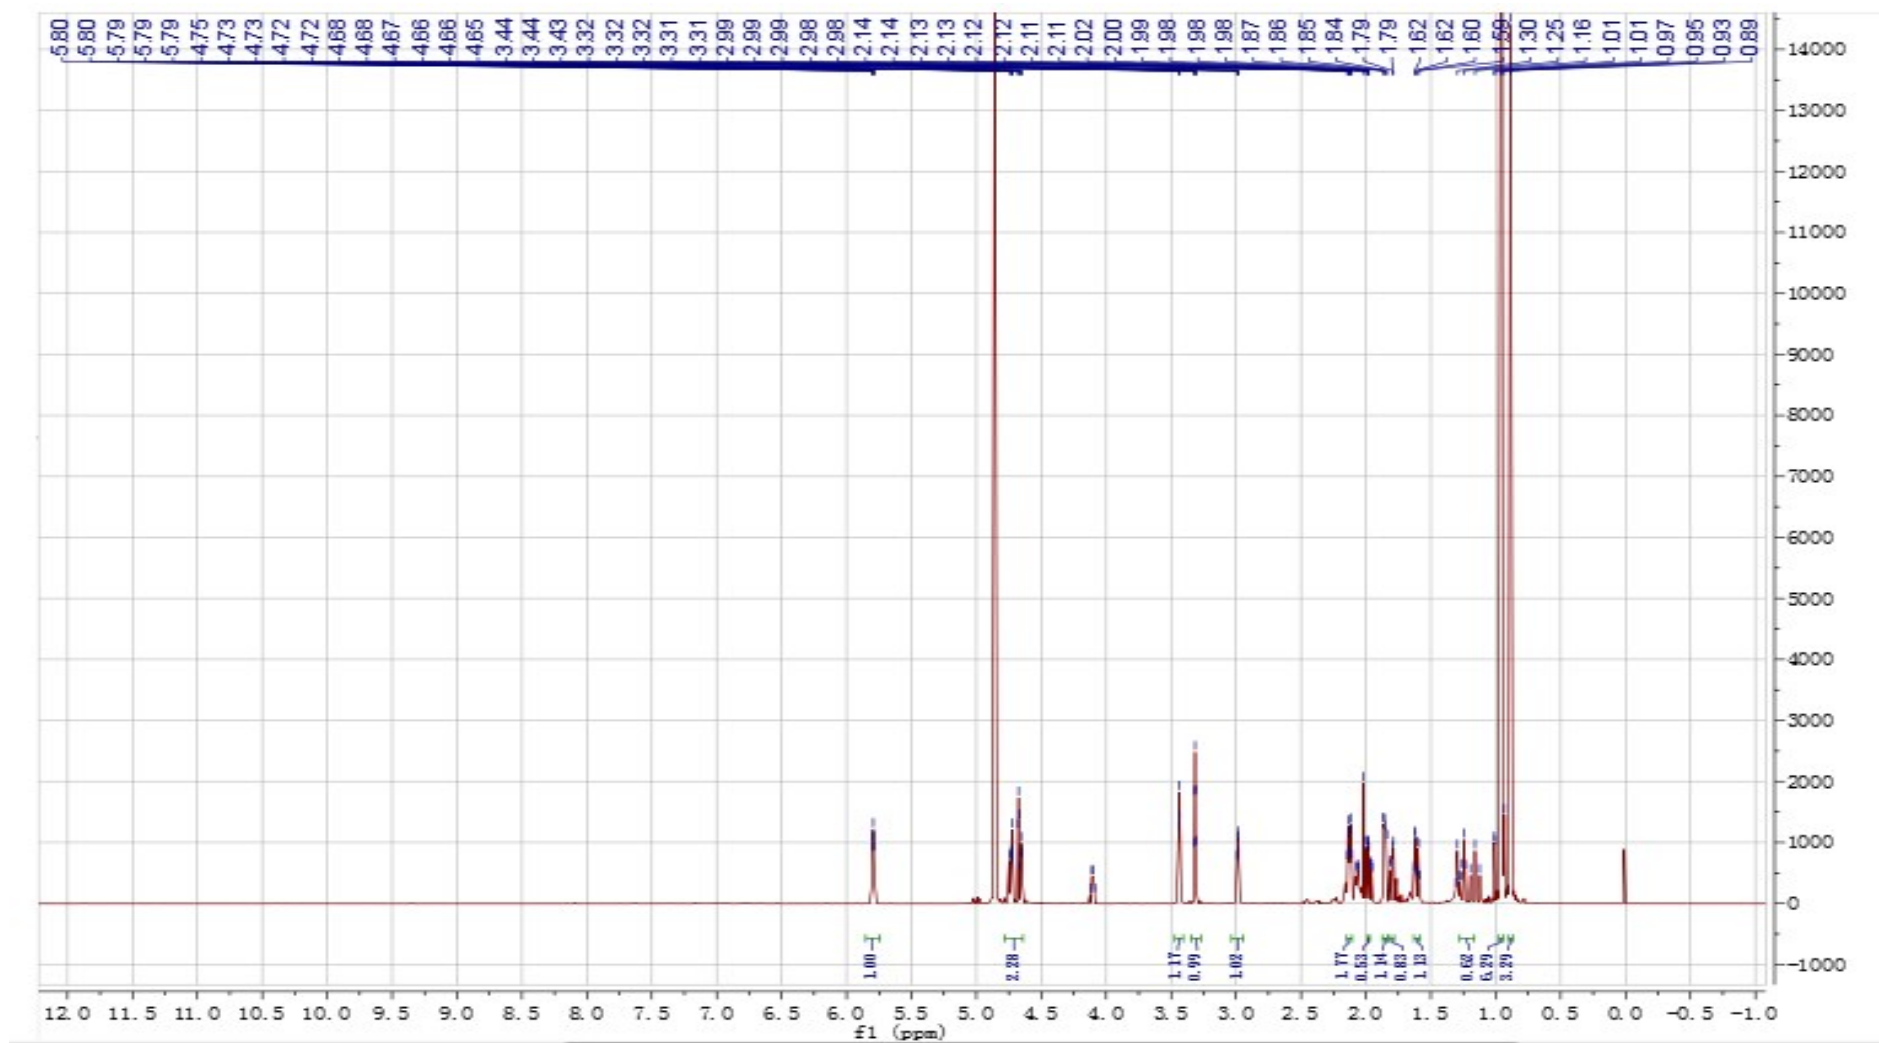

Figure S44. <sup>1</sup>H NMR (600 MHz, CD<sub>3</sub>OD) spectrum of the compound **8**

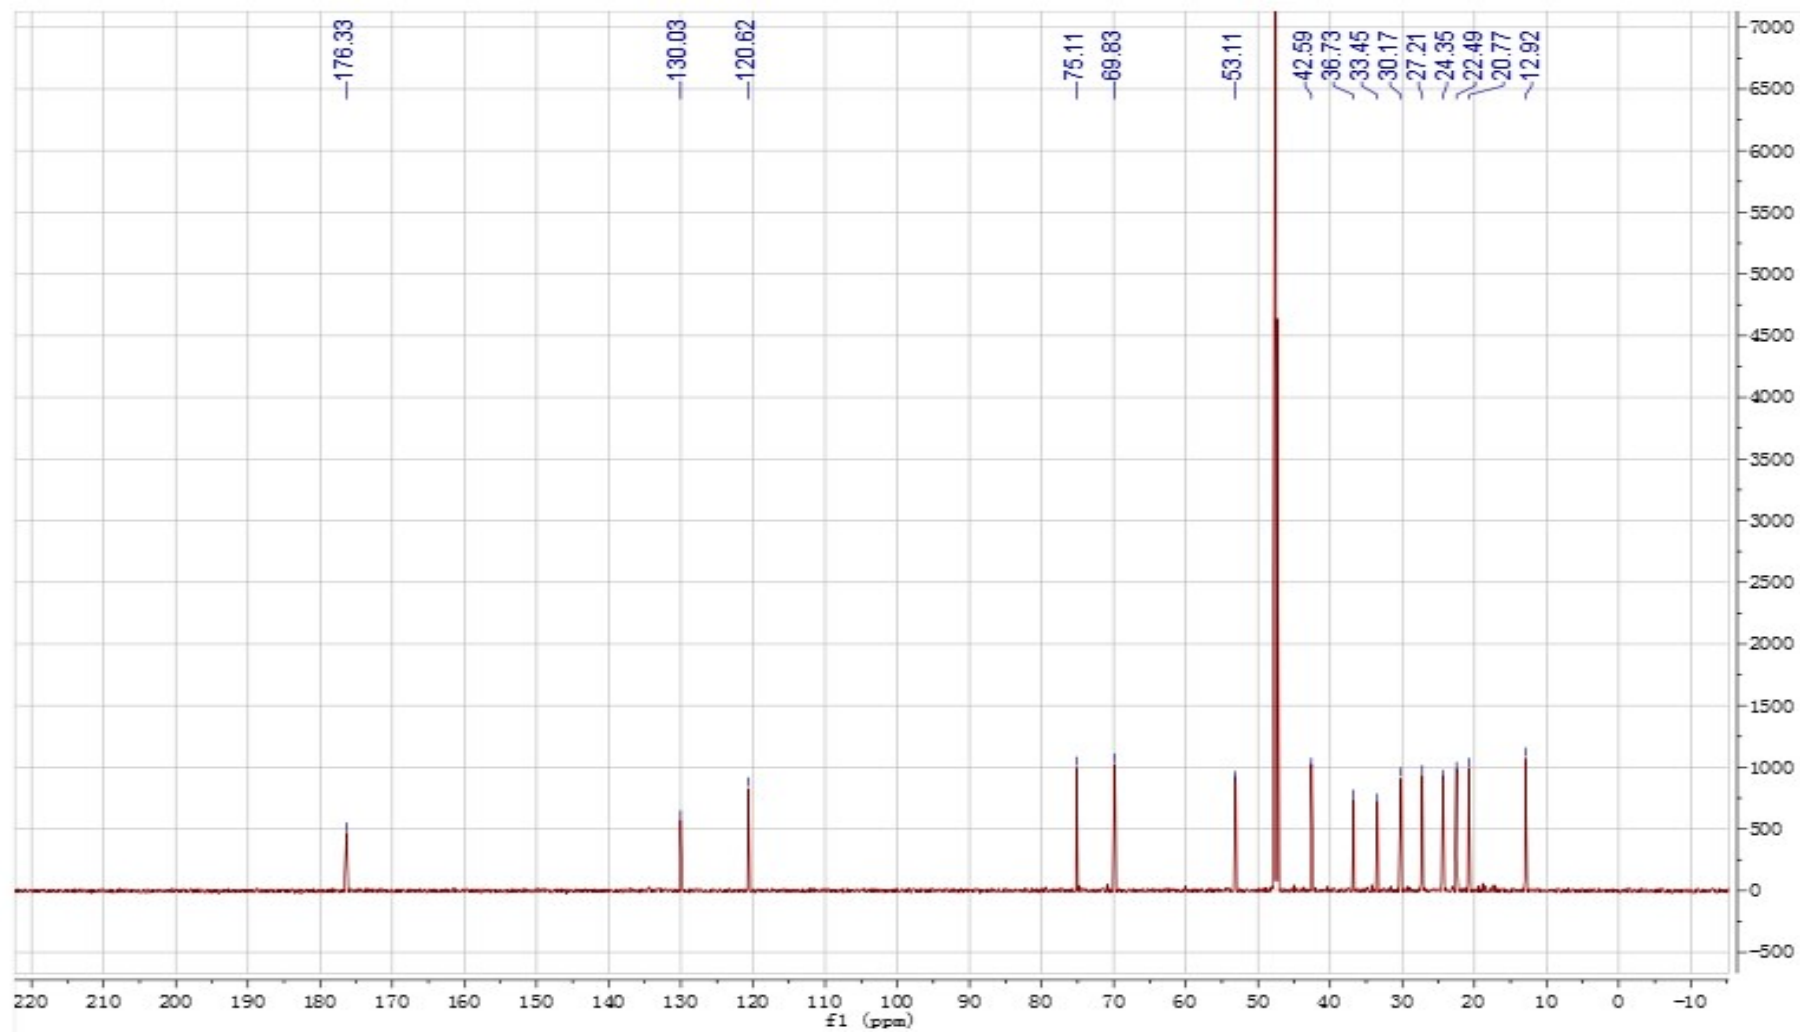

Figure S45.  $^{13}\text{C}$  NMR (150 MHz,  $\text{CD}_3\text{OD}$ ) spectrum of the compound **8**

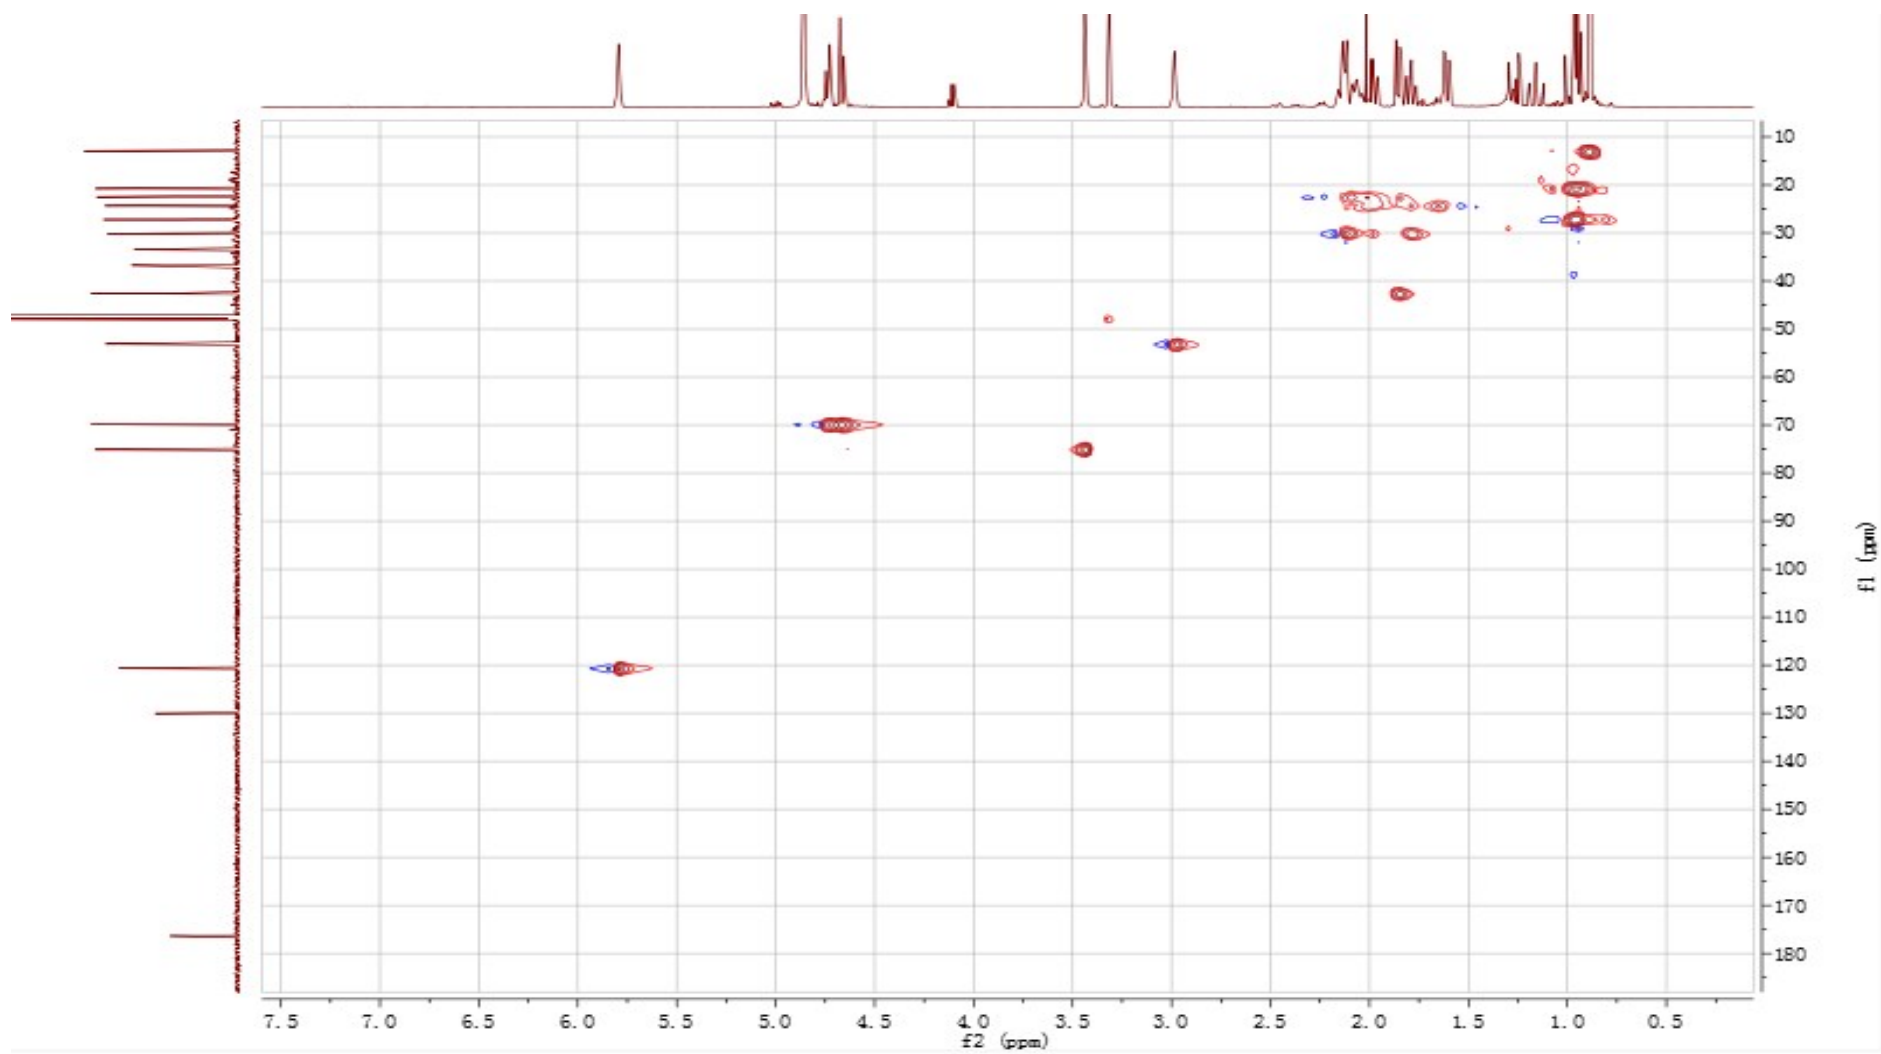

Figure S46. HSQC spectrum of the compound **8**

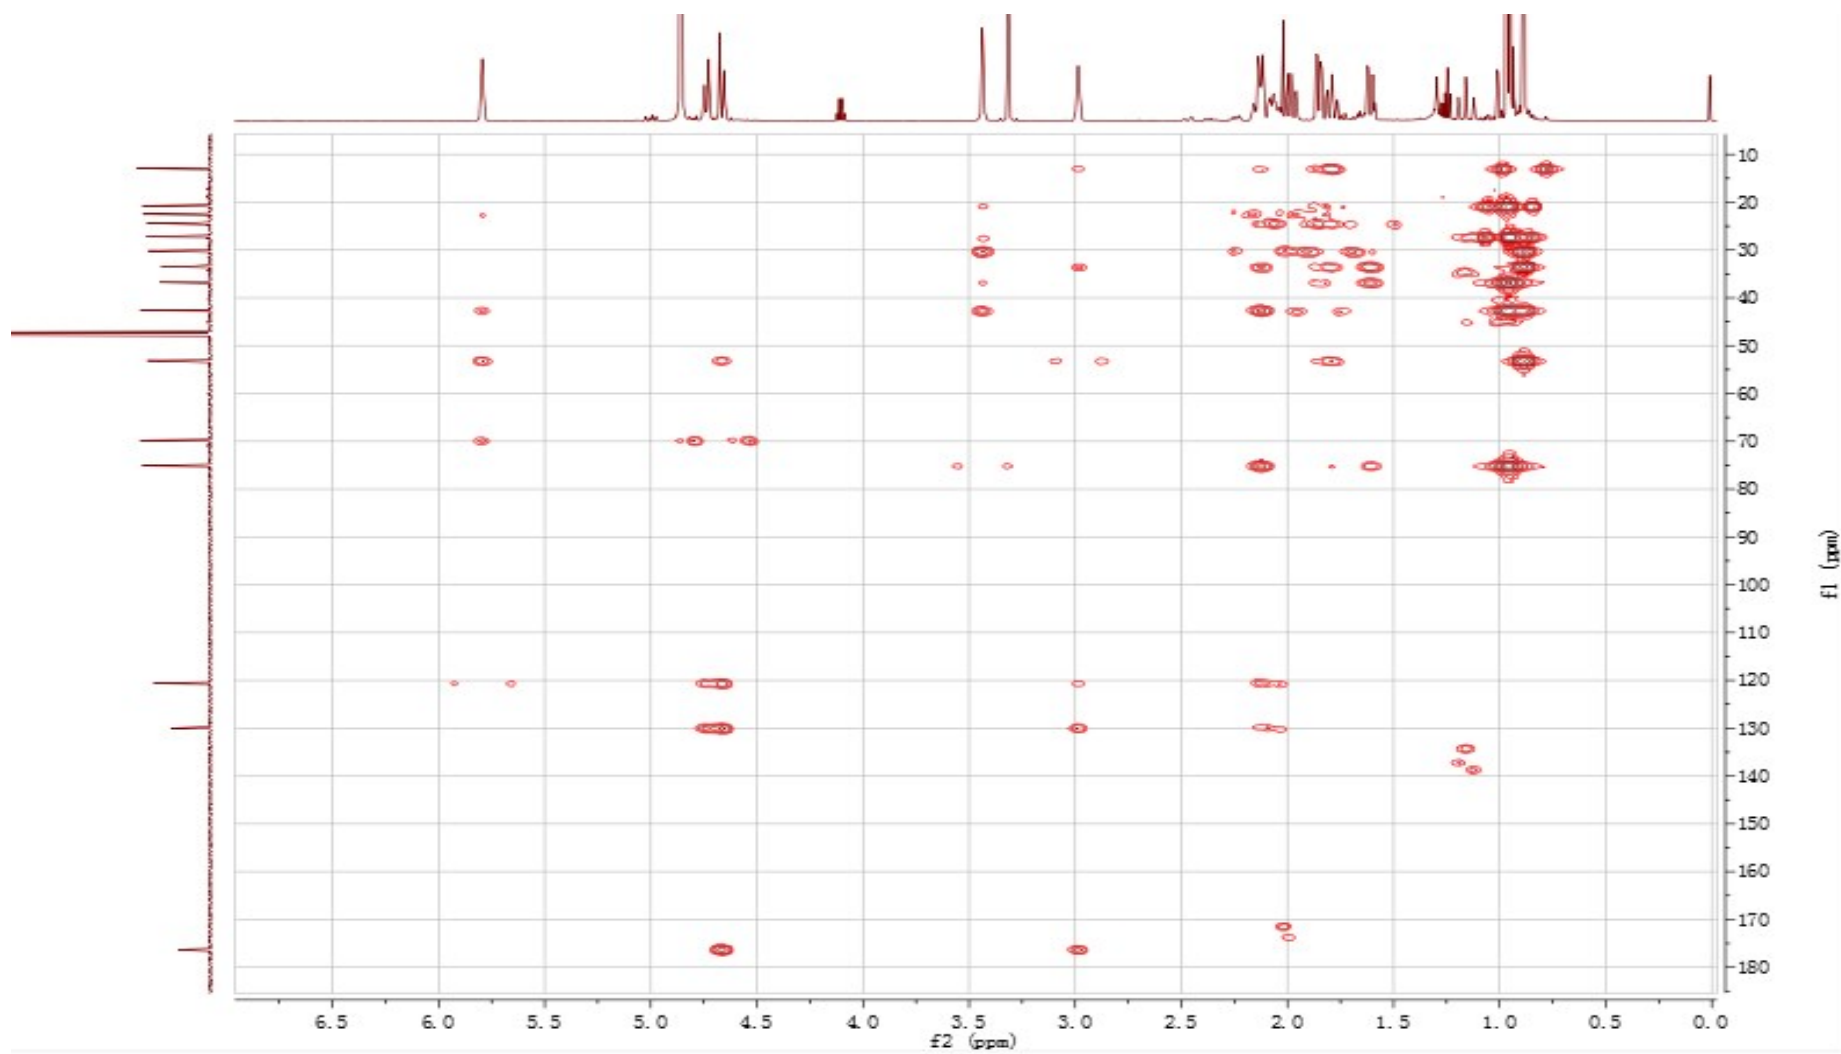

Figure S47. HMBC spectrum of the compound **8**

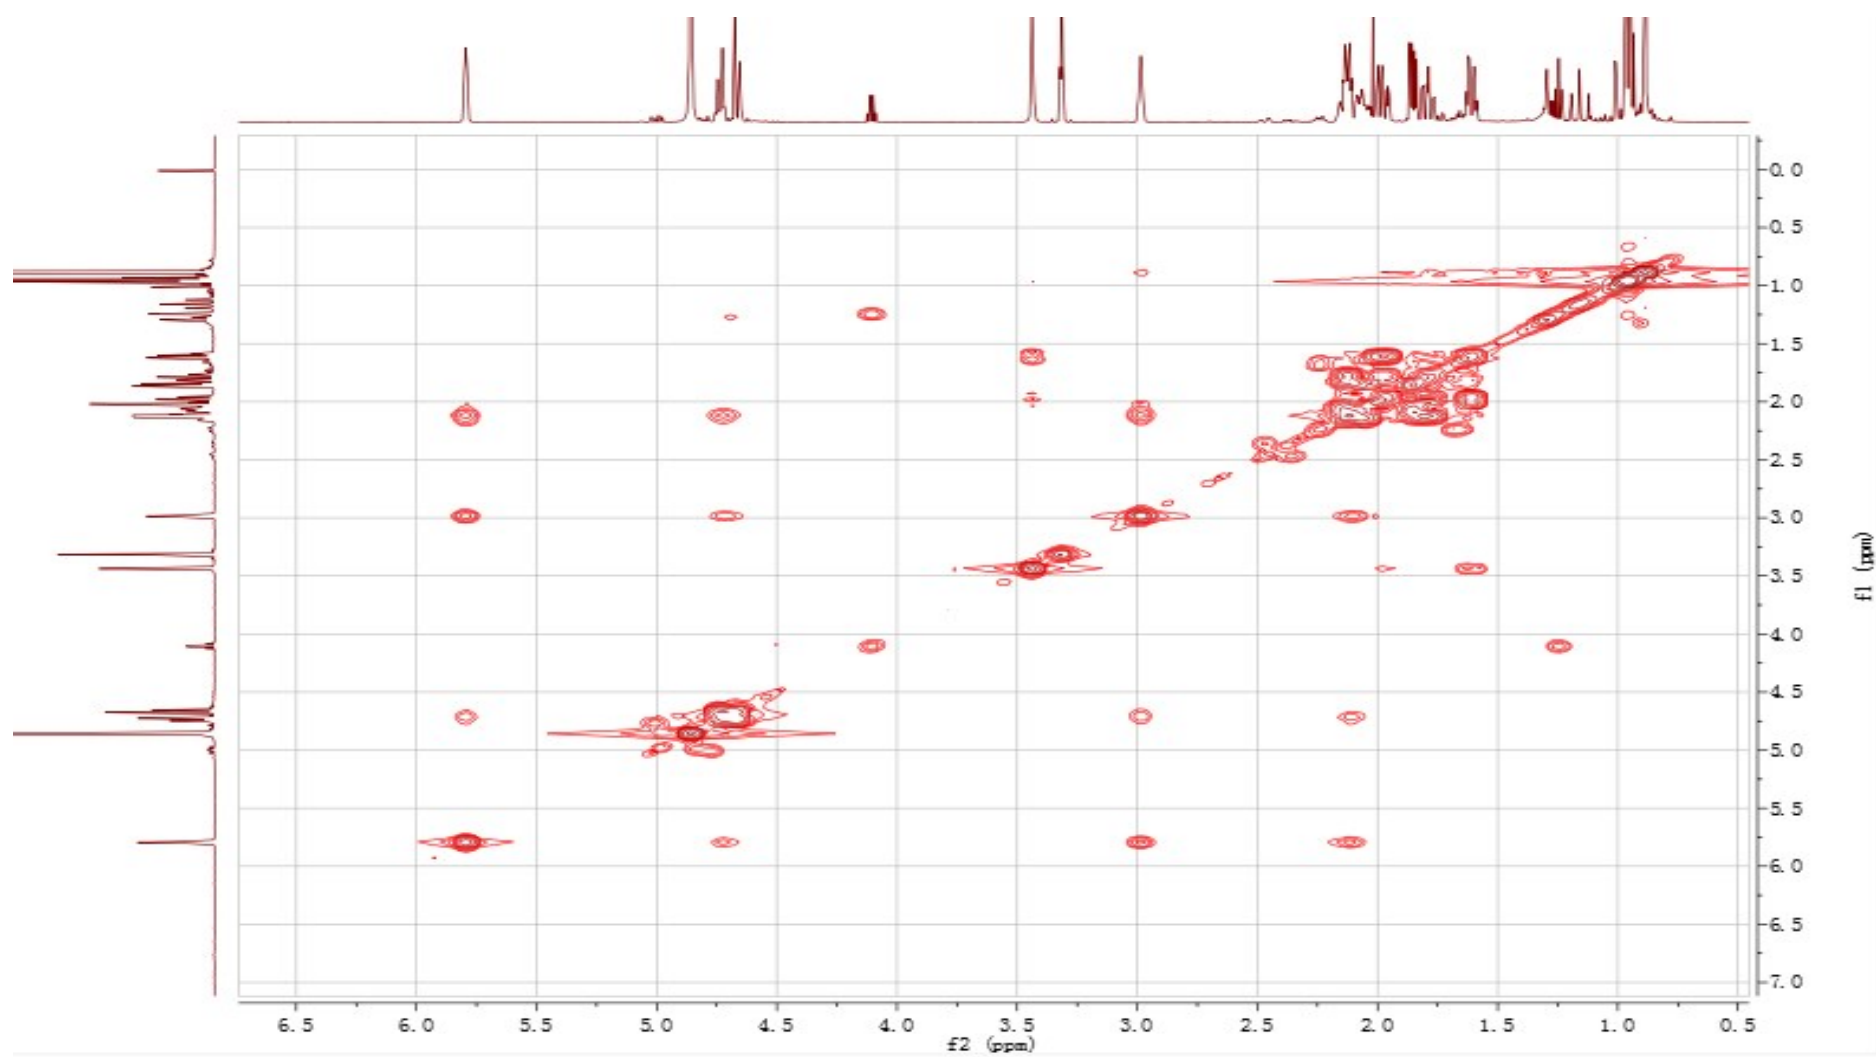

Figure S48. COSY spectrum of the compound **8**

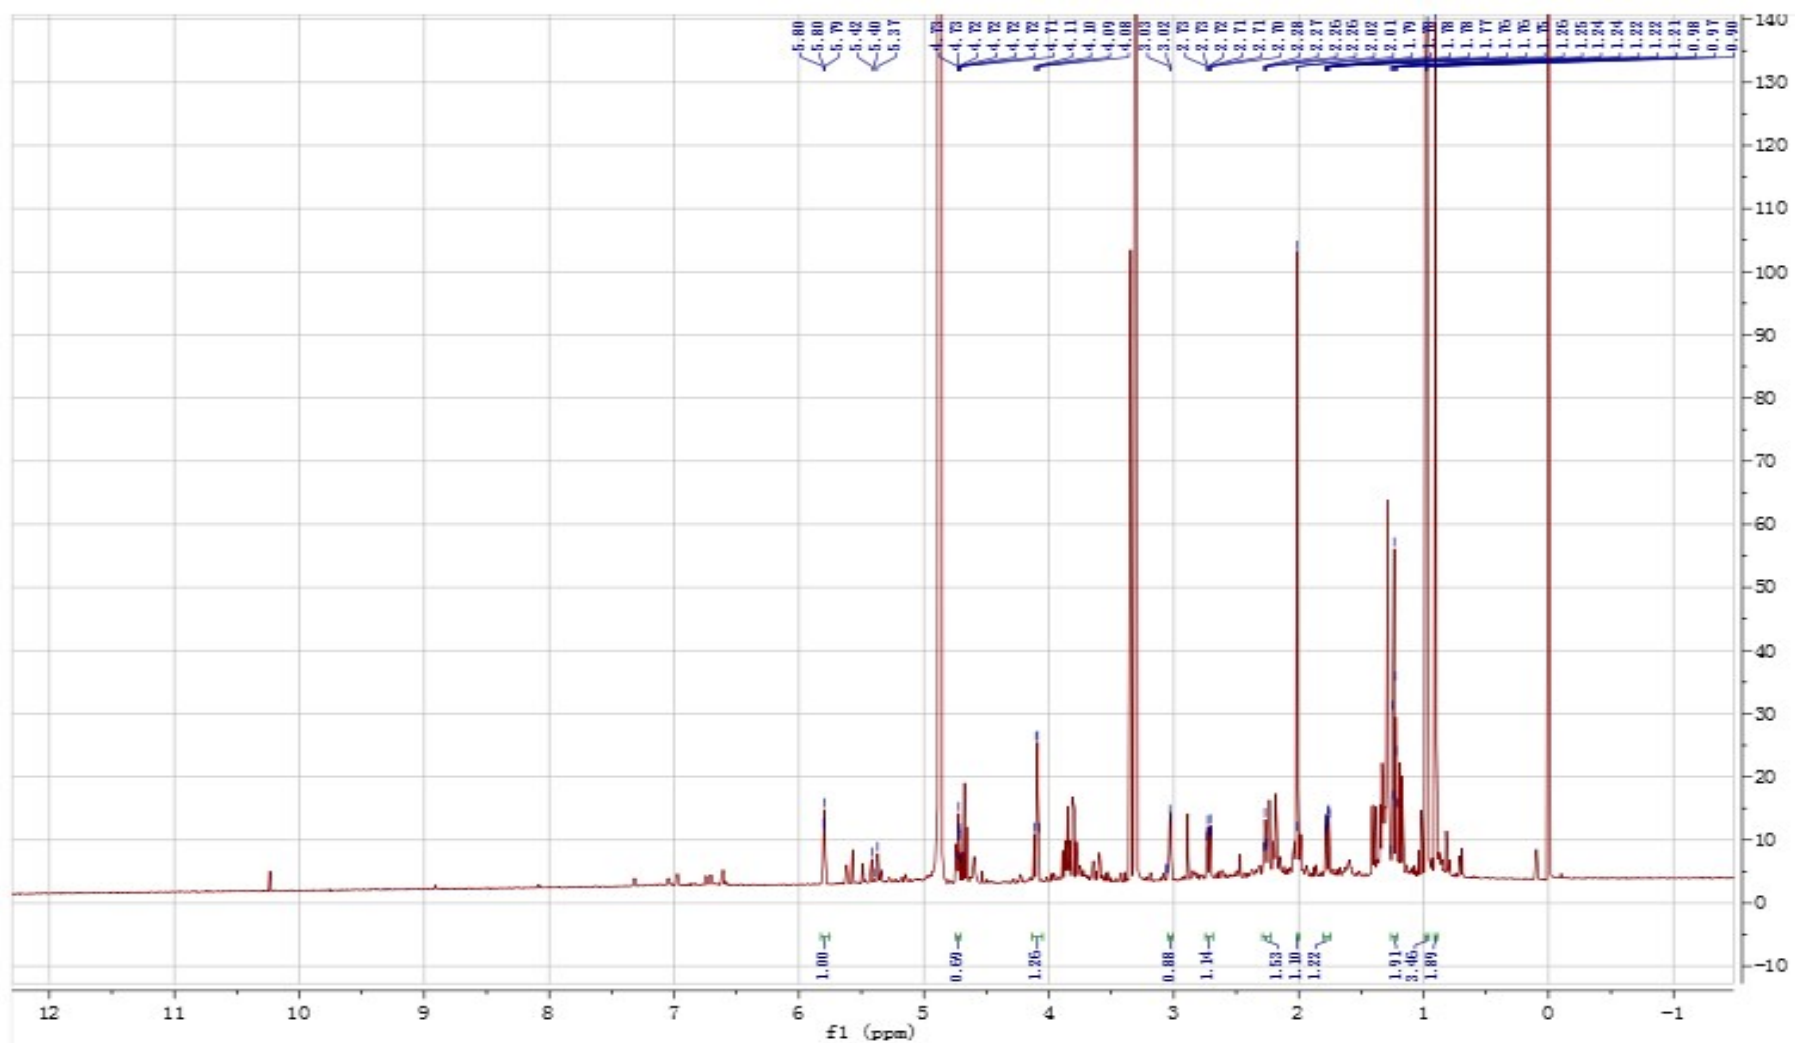

Figure S49.  $^1\text{H}$  NMR (600 MHz,  $\text{CD}_3\text{OD}$ ) spectrum of the compound **9**

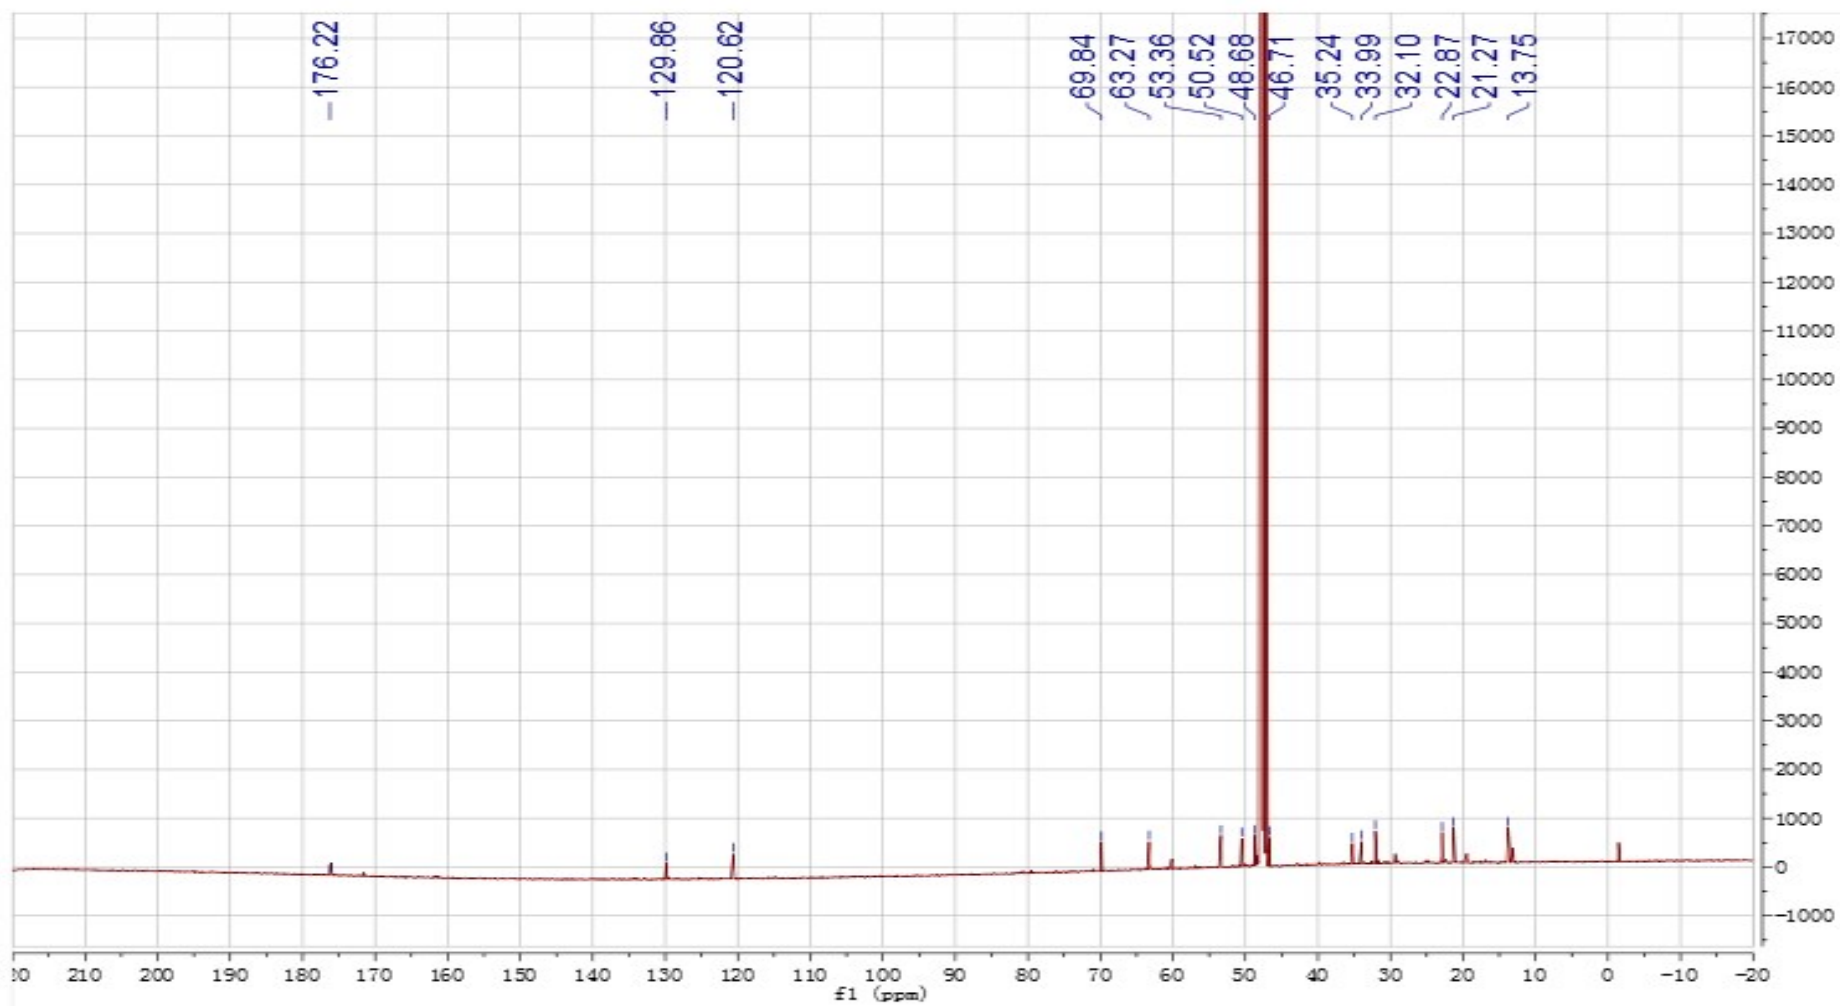

Figure S50.  $^{13}\text{C}$  NMR (150 MHz,  $\text{CD}_3\text{OD}$ ) spectrum of the compound **9**

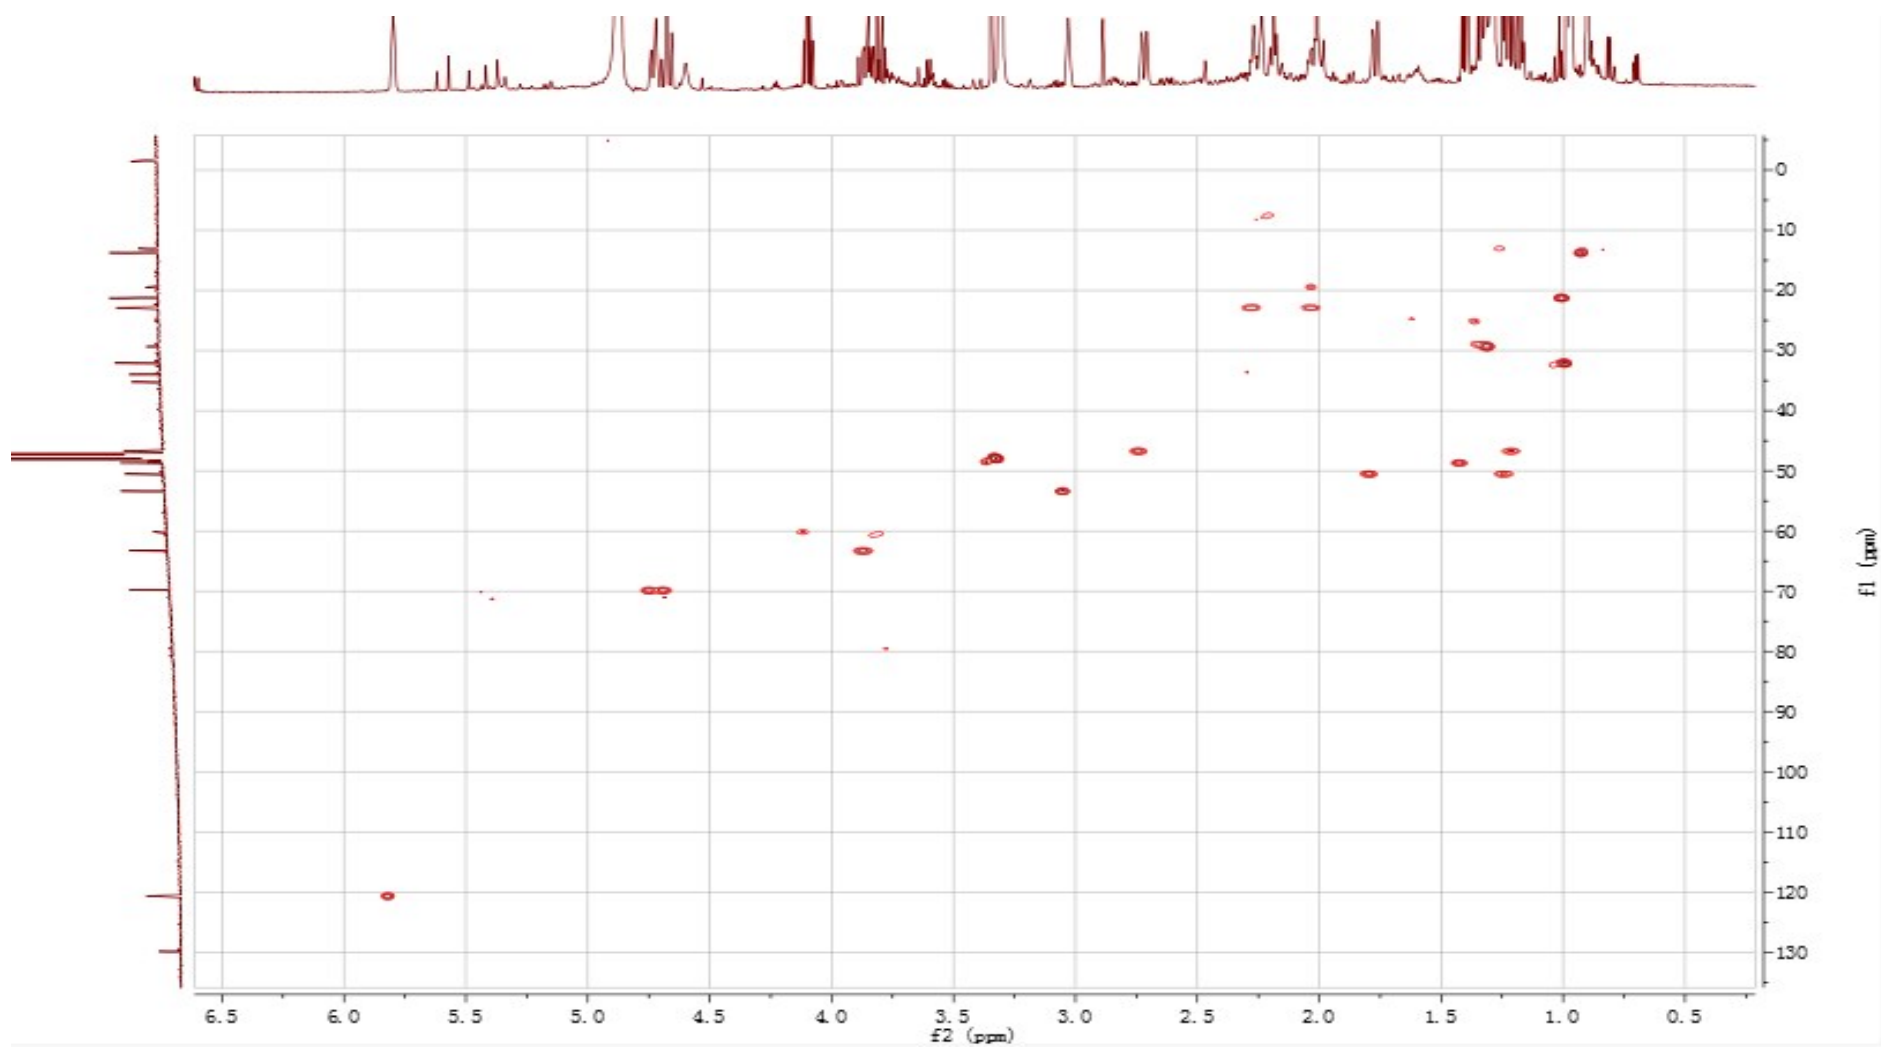

Figure S51. HSQC spectrum of the compound 9



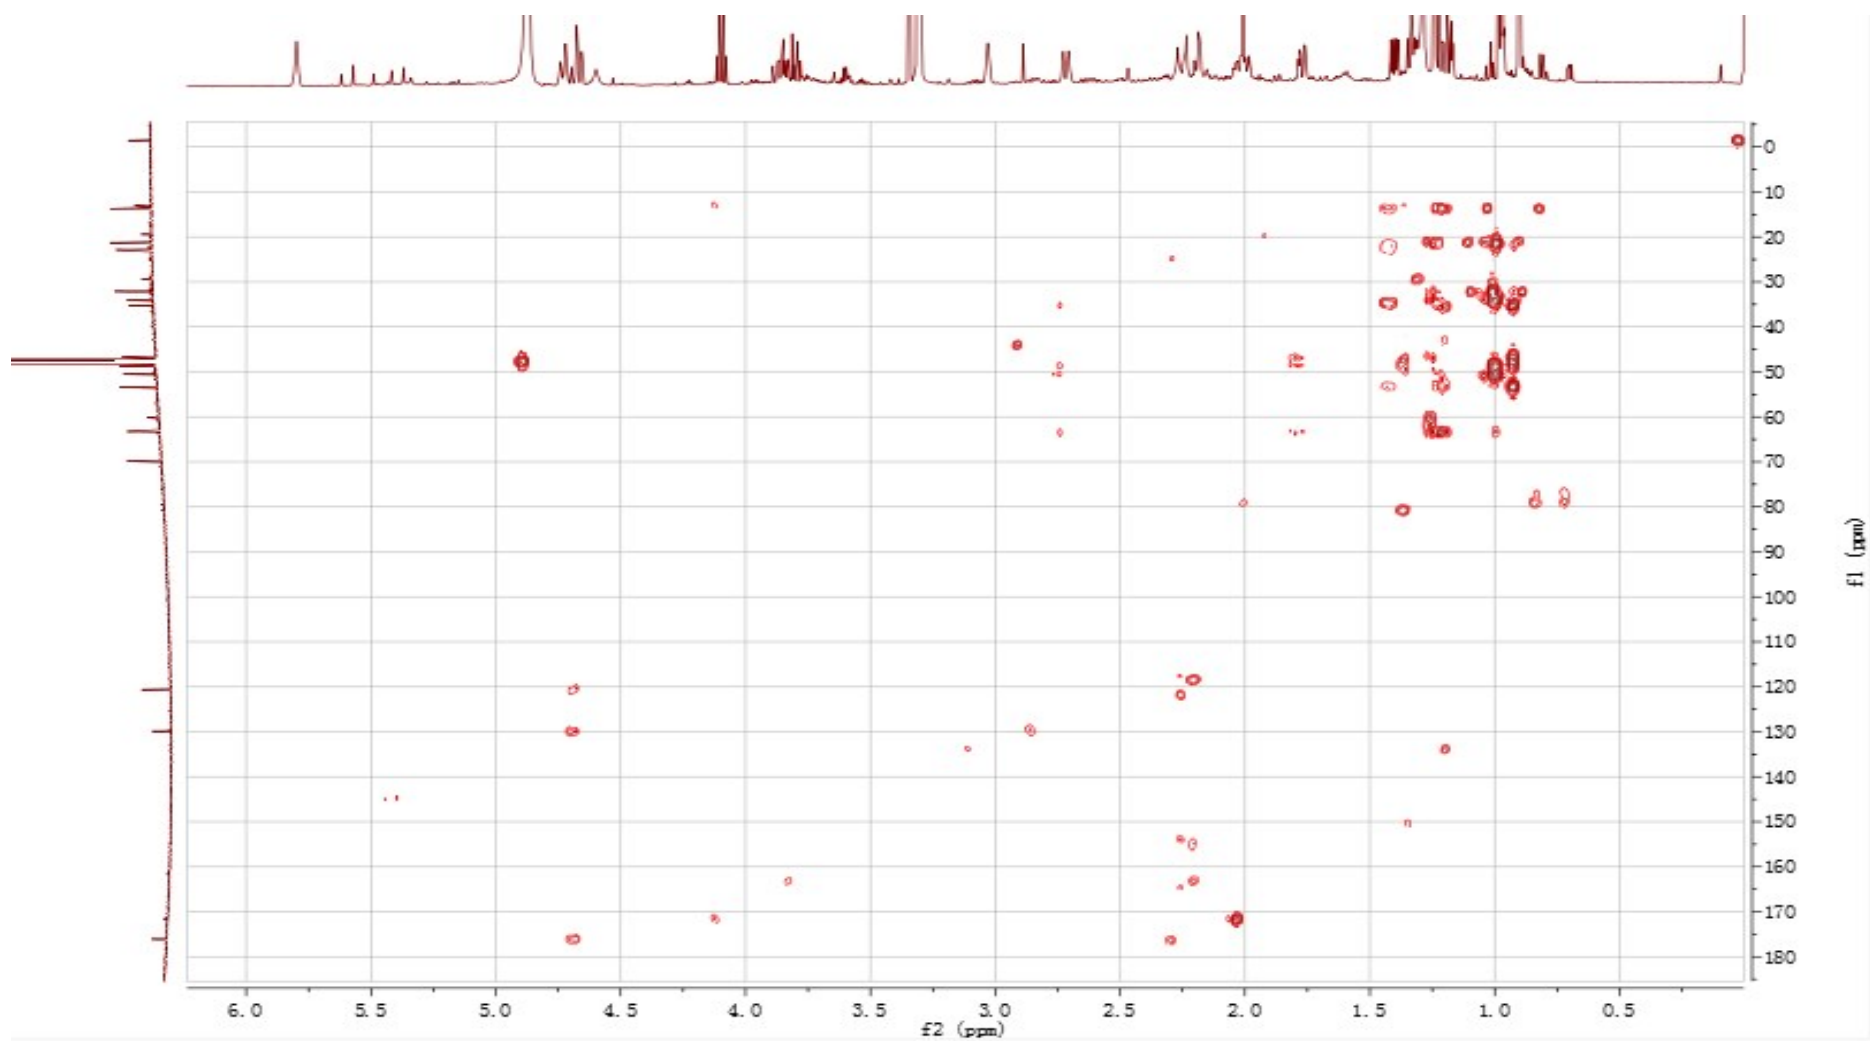

Figure S52. HMBC spectrum of the compound 9

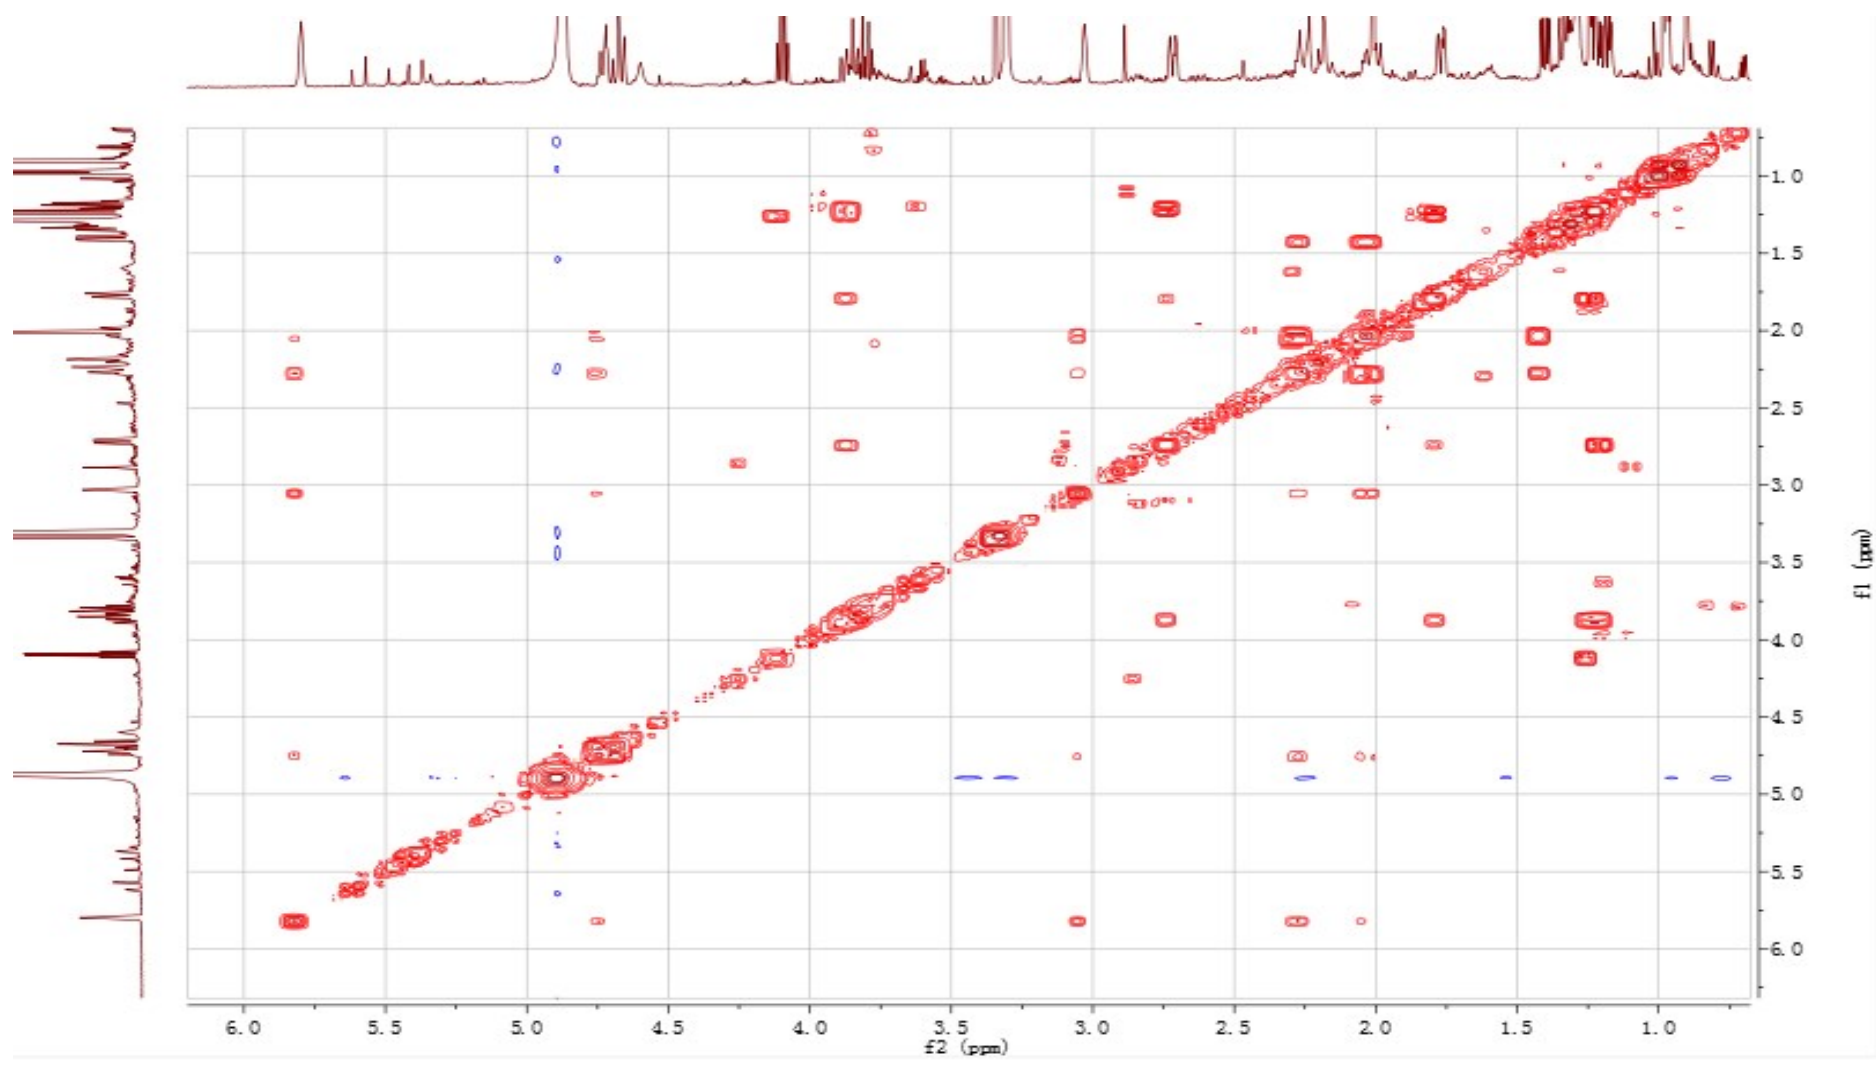

Figure S53. COSY spectrum of the compound 9

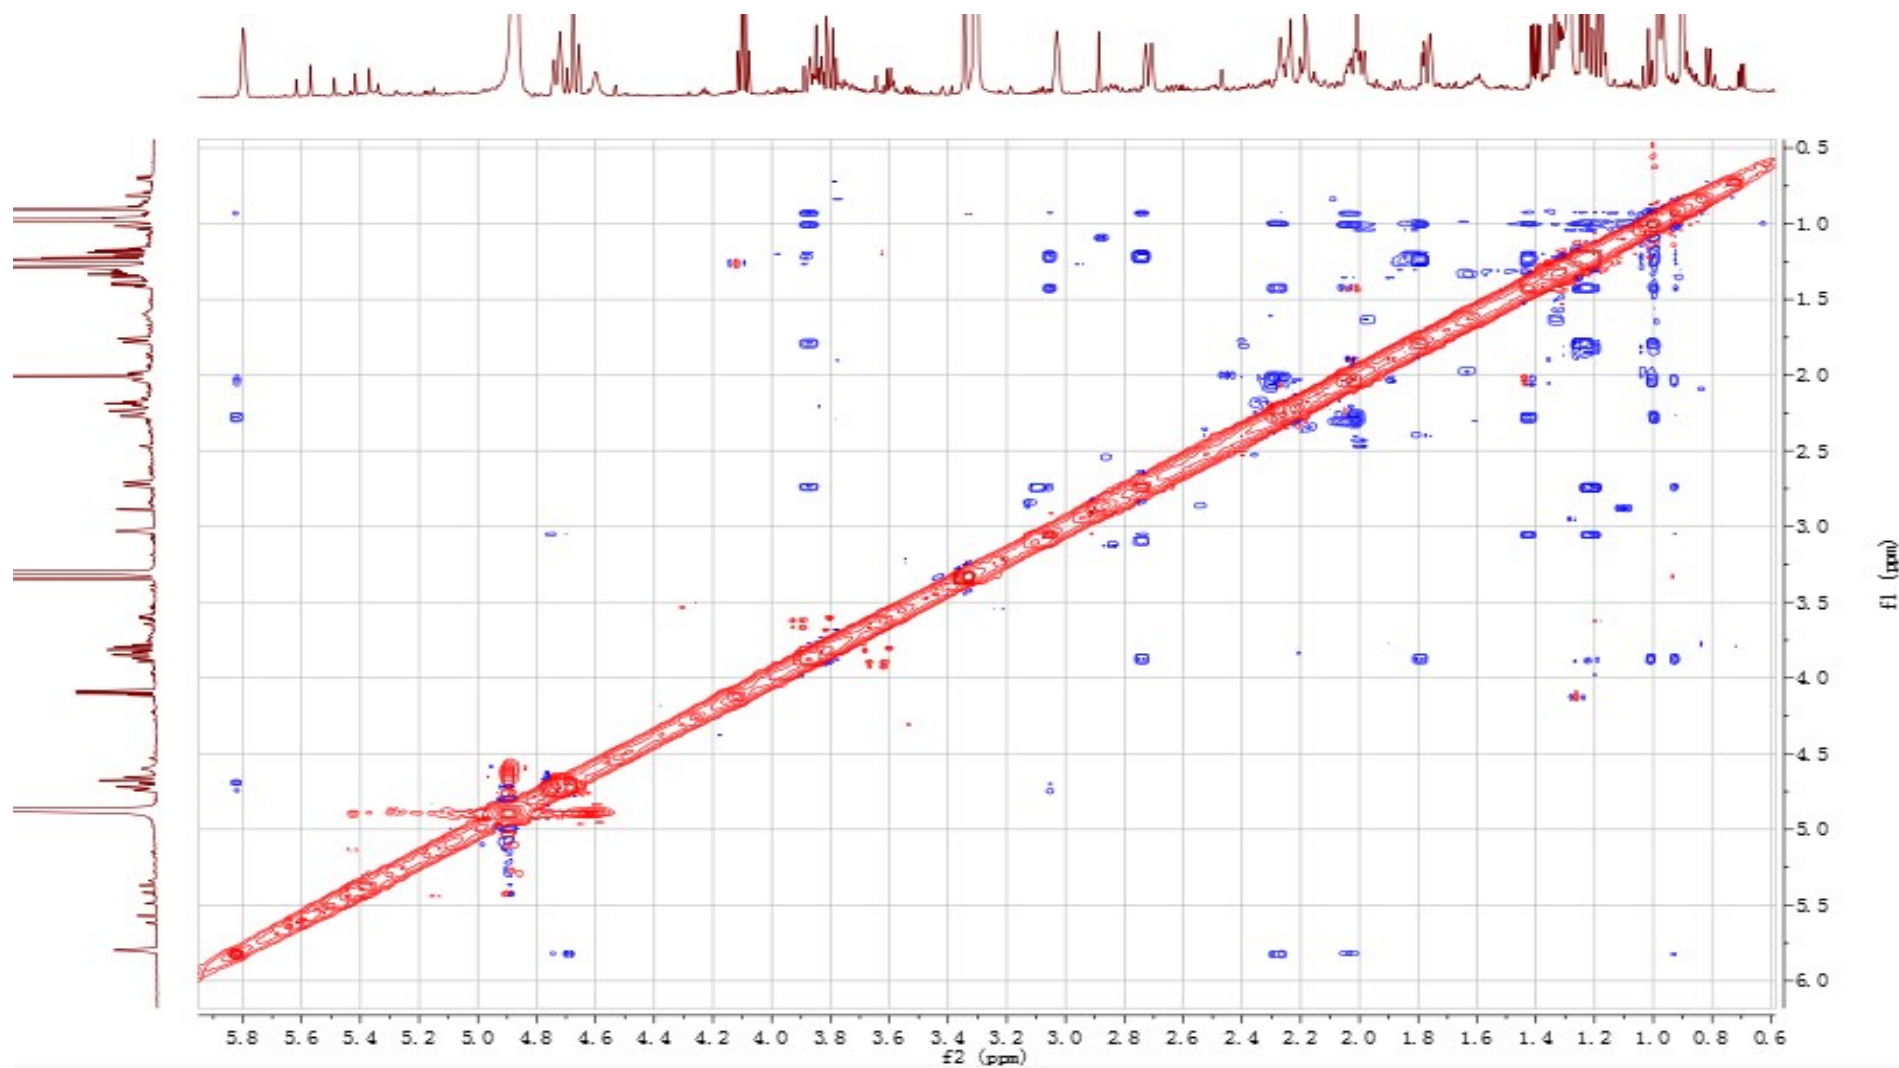

Figure S54. NOESY spectrum of the compound 9

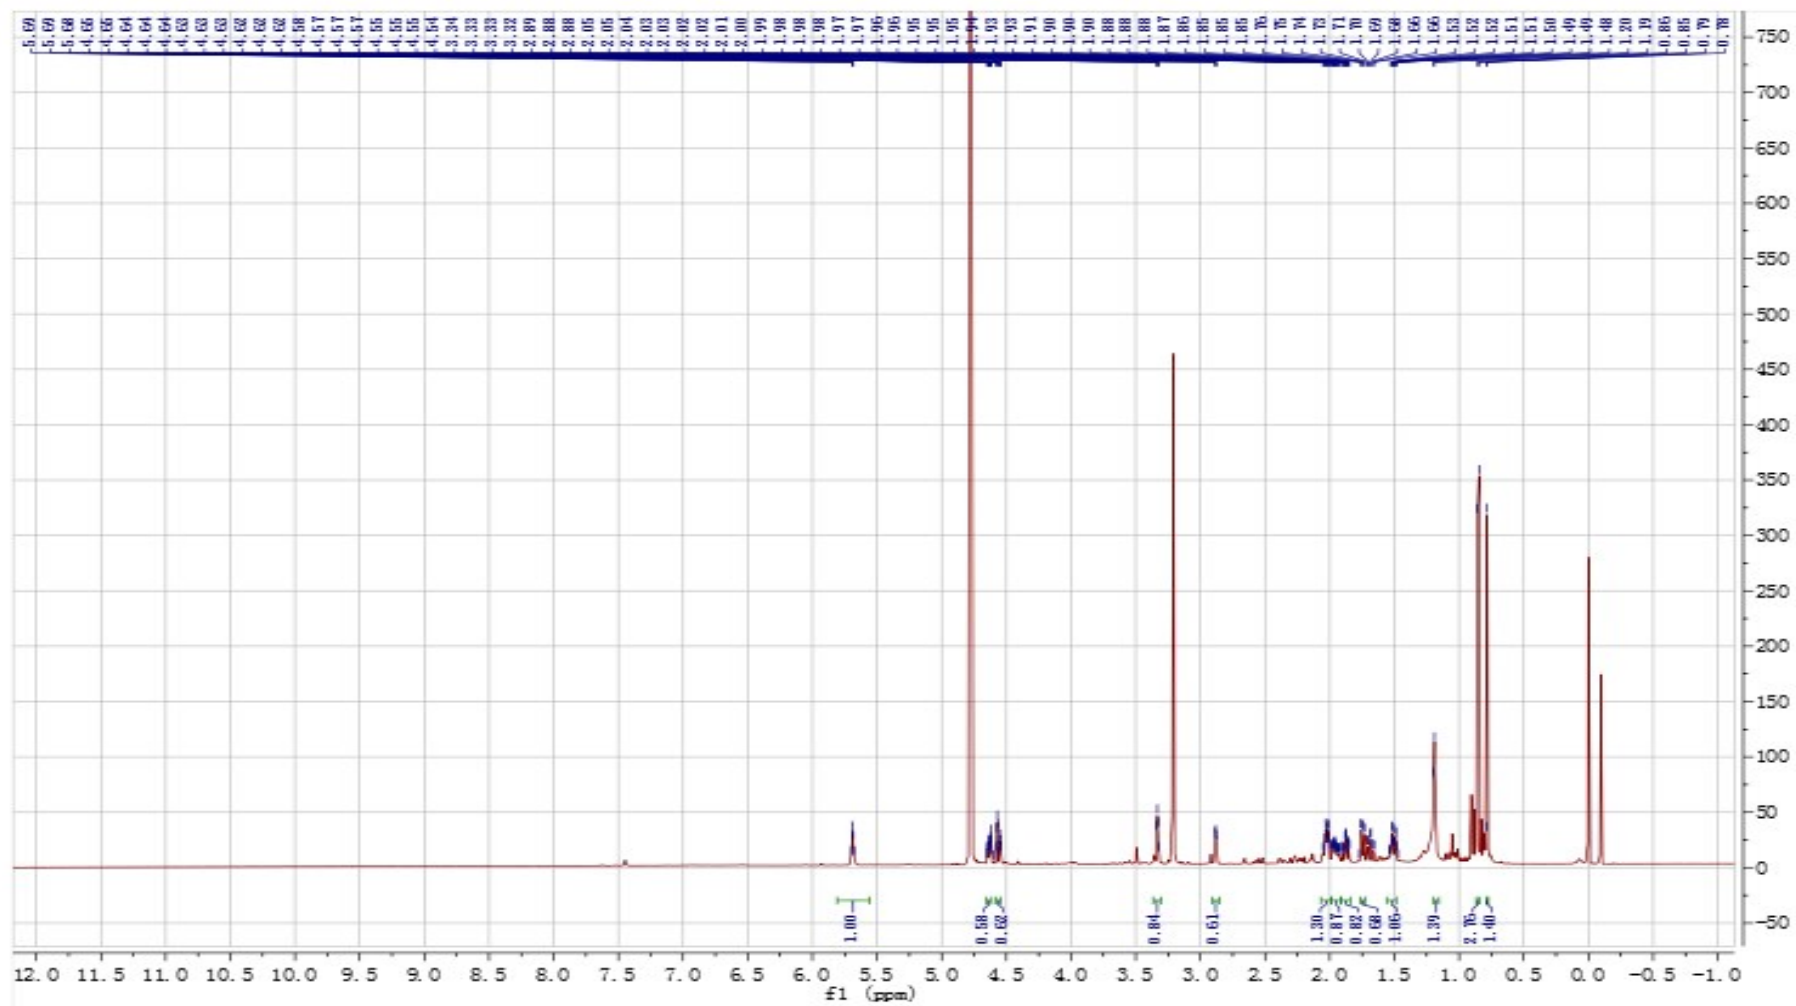

Figure S55.  $^1\text{H}$  NMR (600 MHz,  $\text{CD}_3\text{OD}$ ) spectrum of the compound **10**

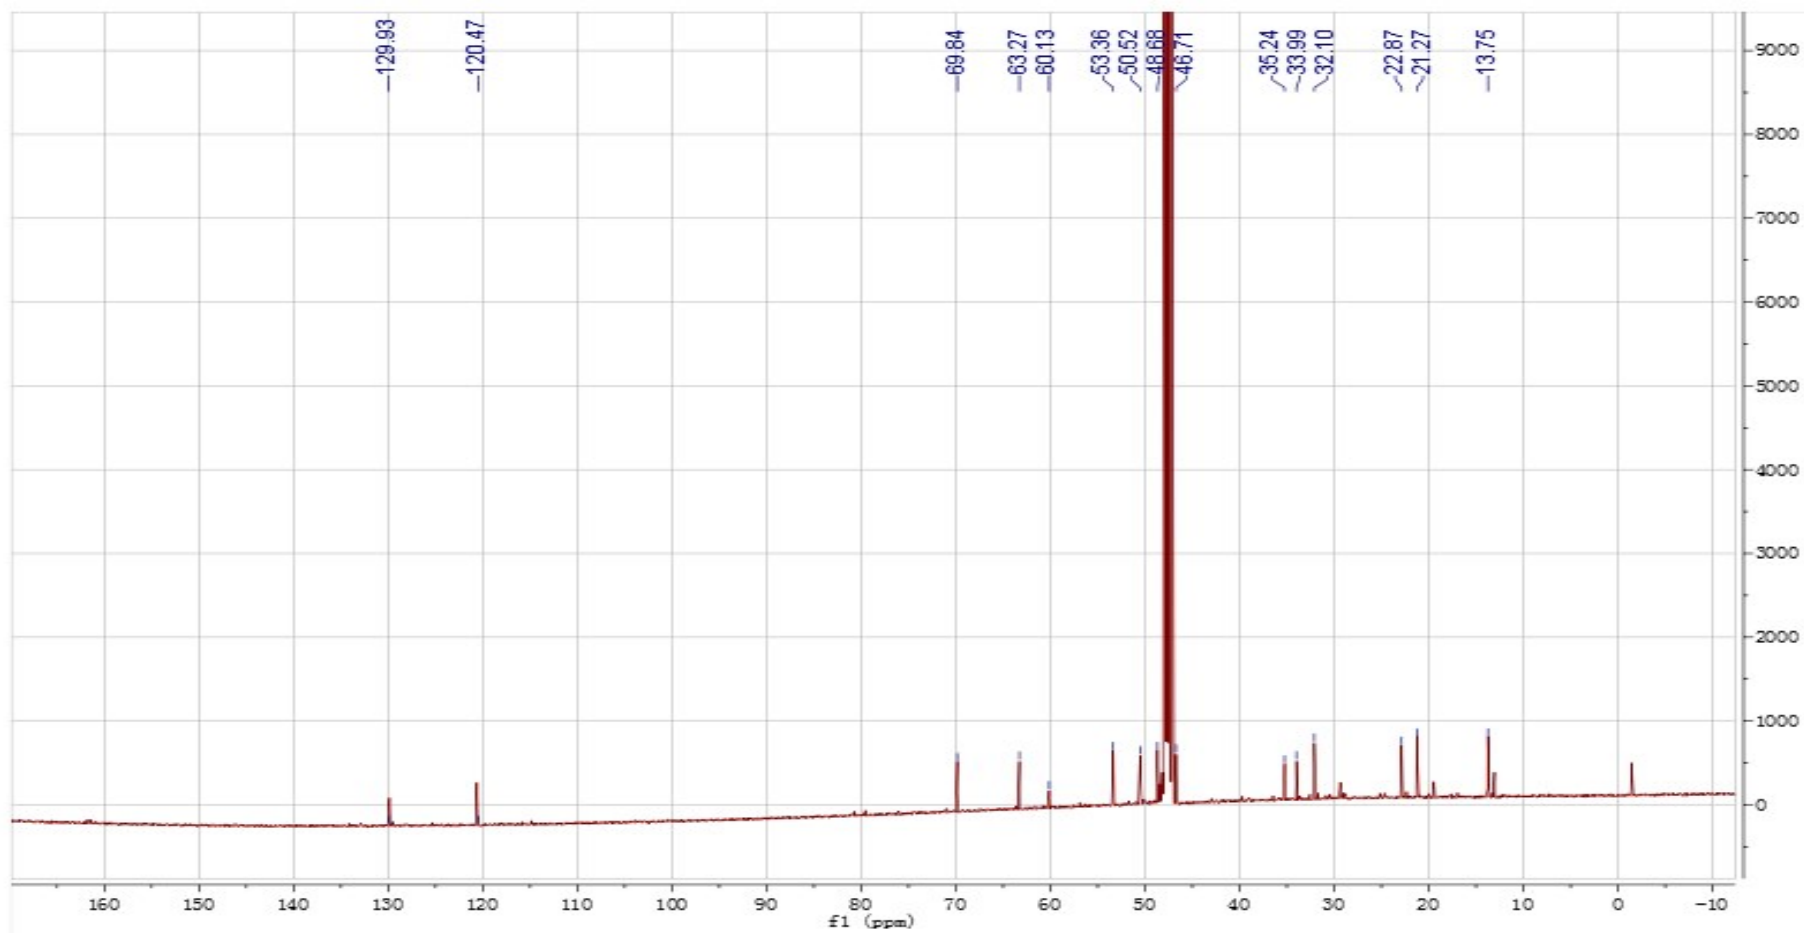

Figure S56.  $^{13}\text{C}$  NMR (150 MHz,  $\text{CD}_3\text{OD}$ ) spectrum of the compound **10**

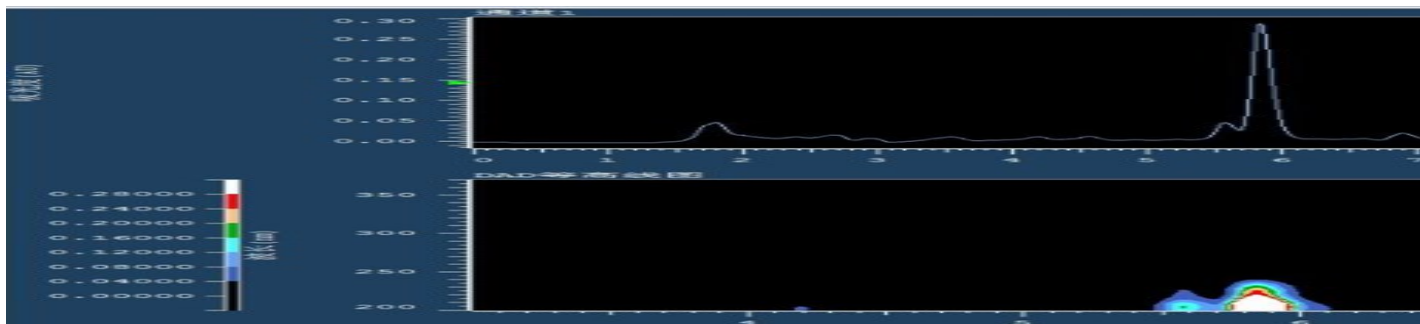

Figure S57. Chromatogram of the chiral HPLC separation of **3** and **11**.

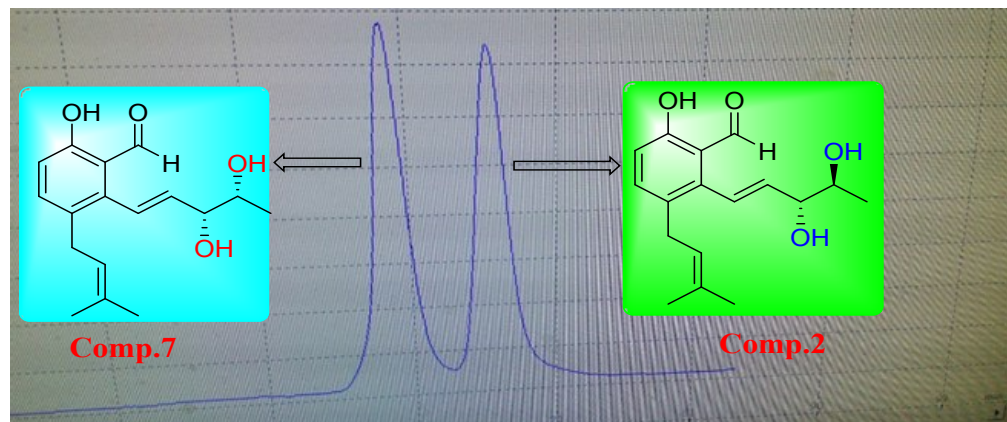

Figure S58. Chromatogram of the HPLC separation of **2** and **7**.

**Table S1.** <sup>1</sup>H (600 MHz) and <sup>13</sup>C NMR (150 MHz) data for compounds **1** and **6** in CD<sub>3</sub>OD

| No. | <b>1</b>                     |                                                            | <b>6</b>                     |                                                            |
|-----|------------------------------|------------------------------------------------------------|------------------------------|------------------------------------------------------------|
|     | <i>d</i> <sub>C</sub> , type | <i>d</i> <sub>H</sub> ( <i>J</i> in Hz)                    | <i>d</i> <sub>C</sub> , type | <i>d</i> <sub>H</sub> ( <i>J</i> in Hz)                    |
| 1   | 197.3, CH                    | 10.43, s                                                   | 197.3, CH                    | 10.44, s                                                   |
| 2   | 119.4, C                     |                                                            | 119.4, C                     |                                                            |
| 3   | 164.4, C                     |                                                            | 164.4, C                     |                                                            |
| 4   | 116.6, CH                    | 6.79, d (8.0)                                              | 116.6, CH                    | 6.80, d (8.0)                                              |
| 5   | 138.3, CH                    | 7.45, t (8.0)                                              | 138.3, CH                    | 7.45, t (8.0)                                              |
| 6   | 122.5, CH                    | 6.85, d (8.0)                                              | 122.5, CH                    | 6.85, d (8.0)                                              |
| 7   | 148.8, C                     |                                                            | 148.8, C                     |                                                            |
| 8   | 28.9, CH <sub>2</sub>        | 3.25, ddd (14.5, 10.4, 4.6)<br>3.00, ddd (14.5, 10.1, 6.7) | 29.1, CH <sub>2</sub>        | 3.23, ddd (13.8, 10.3, 4.8)<br>3.03, ddd (13.8, 10.1, 6.8) |
| 9   | 37.2, CH <sub>2</sub>        | 1.94, ddd (13.4, 10.1, 6.6)<br>1.69, ddd (13.4, 9.8, 4.6)  | 36.9, CH <sub>2</sub>        | 1.82, ddd (14.1, 6.8, 3.4)<br>1.76, ddd (14.1, 9.4, 4.6)   |
| 10  | 75.9, CH                     | 3.39, ddd (9.0, 5.8, 2.4)                                  | 75.6, CH                     | 3.41, ddd (9.4, 5.1, 3.1)                                  |
| 11  | 71.7, CH                     | 3.59, dd (6.2, 5.8)                                        | 71.3, CH                     | 3.65, qd (6.4, 5.1)                                        |
| 12  | 19.1, CH <sub>3</sub>        | 1.19, d (6.2)                                              | 18.9, CH <sub>3</sub>        | 1.16, d (6.4)                                              |

**Table S2.**  $^1\text{H}$  (600 MHz) and  $^{13}\text{C}$  NMR (150 MHz) data for compounds **2** and **7** in  $\text{CD}_3\text{OD}$ 

| No. | <b>2</b>              |                             | <b>7</b>              |                             |
|-----|-----------------------|-----------------------------|-----------------------|-----------------------------|
|     | $d_{\text{C}}$ , type | $d_{\text{H}}$ ( $J$ in Hz) | $d_{\text{C}}$ , type | $d_{\text{H}}$ ( $J$ in Hz) |
| 1   | 197.7, CH             | 10.23, s                    | 197.6, CH             | 10.21, s                    |
| 2   | 118.4, C              |                             | 118.5, C              |                             |
| 3   | 161.4, C              |                             | 160.7, C              |                             |
| 4   | 115.5, CH             | 6.79, d (8.6)               | 115.5, CH             | 6.79, d (8.6)               |
| 5   | 137.3, CH             | 7.35, d (8.6)               | 137.3, CH             | 7.34, d (8.6)               |
| 6   | 131.0, C              |                             | 131.0, CH             |                             |
| 7   | 141.9, C              |                             | 141.9, C              |                             |
| 8   | 125.3, CH             | 6.85, dd (16.1, 1.3)        | 125.4, $\text{CH}_2$  | 6.89, dd (16.0, 1.4)        |
| 9   | 140.1, CH             | 5.81, dd (16.1, 6.1)        | 139.9, $\text{CH}_2$  | 5.77, dd (16.0, 5.1)        |
| 10  | 76.2, CH              | 4.13, ddd (6.4, 5.2, 1.4)   | 76.0, CH              | 4.15, dq (5.8, 1.4)         |
| 11  | 70.2, CH              | 3.77, qd (6.2, 5.2)         | 70.1, CH              | 3.77, qd (6.4, 5.8)         |
| 12  | 17.8, $\text{CH}_3$   | 1.23, d (6.2)               | 17.6, $\text{CH}_3$   | 1.20, d (6.4)               |
| 1'  | 30.6, $\text{CH}_2$   | 3.31, d (7.1)               | 30.6, $\text{CH}_2$   | 3.30, d (5.7)               |
| 2'  | 122.4, CH             | 5.20, t (7.1)               | 122.4, CH             | 5.18, t (5.7)               |
| 3'  | 132.3, C              |                             | 132.3, C              |                             |
| 4'  | 16.6, $\text{CH}_3$   | 1.72, s                     | 16.6, $\text{CH}_3$   | 1.72, s                     |
| 5'  | 24.5, $\text{CH}_3$   | 1.72, s                     | 24.5, $\text{CH}_3$   | 1.72, s                     |



### **Computational details for compound 1-3 (ECD)**

The calculations of new compounds **1-3** were performed by using the density functional theory (DFT) as carried out in the Gaussian 09. Conformation search were performed with MMFF94S force fields using Maestro 10.2 software. All these conformers were further optimized by the density functional theory method at the B3LYP/6-31G(d) level. The ECD were calculated using density functional theory (TDDFT) at B3LYP/6-31+G(d) level. The calculated ECD curves were all generated using SpecDis v 1.53 software.

**Figure S59.** Comparison of the calculated ECD spectra for **1** with the experimental spectrum of **1**

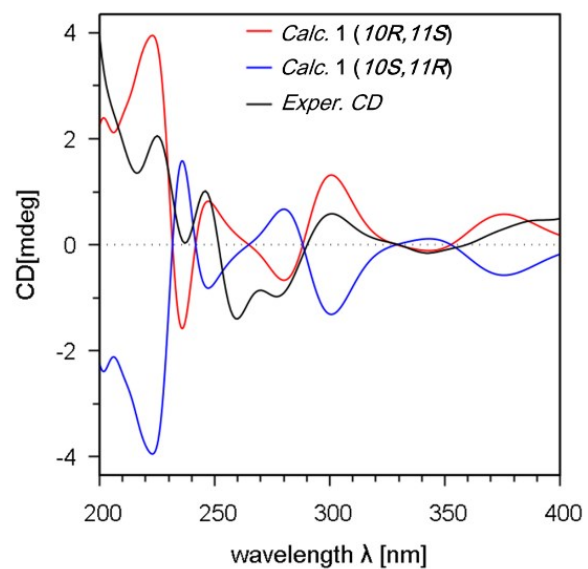

**Table S3.** Energy analysis for conformers of **1** at B3LYP/6-31G(d) level

| <b>Conformer</b> | <b>Energy (hartree)</b> | <b>Ratio (%)</b> |
|------------------|-------------------------|------------------|
| 2                | -767.7954334            | 8.62             |
| 3                | -767.7942924            | 2.57             |
| 4                | -767.7959113            | 14.31            |
| 5                | -767.7955714            | 9.98             |
| 8                | -767.7951577            | 6.44             |
| 9                | -767.7948101            | 4.45             |
| 10               | -767.7945882            | 3.52             |

|    |              |      |
|----|--------------|------|
| 12 | -767.7947665 | 4.25 |
| 13 | -767.7954791 | 9.05 |
| 14 | -767.7951098 | 6.12 |
| 15 | -767.7941229 | 2.15 |
| 16 | -767.7951059 | 6.09 |
| 21 | -767.7946171 | 3.63 |
| 22 | -767.7942295 | 2.41 |
| 25 | -767.7946866 | 3.91 |
| 27 | -767.7942942 | 2.58 |
| 29 | -767.7949942 | 5.41 |
| 30 | -767.7948158 | 4.48 |

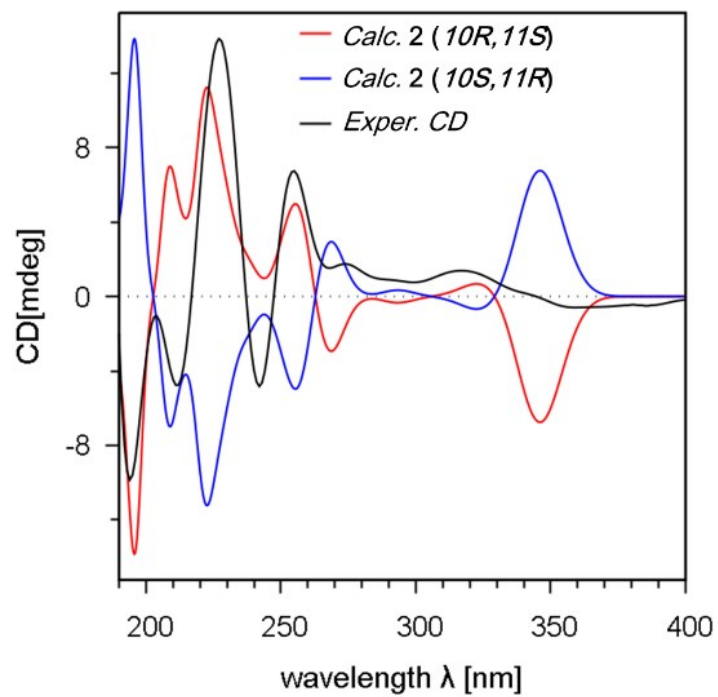

**Figure S60.** Comparison of the calculated ECD spectra for **2** with the experimental spectrum of **2**

**Table S4.** Energy analysis for conformers of **2** at B3LYP/6-31G(d) level

| <b>Conformer</b> | <b>Energy (hartree)</b> | <b>Ratio (%)</b> |
|------------------|-------------------------|------------------|
| 1                | -961.9075567            | 1.71             |
| 2                | -961.9072757            | 1.27             |
| 6                | -961.908038             | 2.85             |
| 8                | -961.9081127            | 3.09             |
| 10               | -961.9110437            | 69.09            |
| 14               | -961.9073732            | 1.41             |
| 16               | -961.9073852            | 1.43             |
| 30               | -961.9083516            | 3.98             |
| 37               | -961.9078313            | 2.29             |
| 42               | -961.9081663            | 3.27             |
| 69               | -961.9072664            | 1.26             |

|    |              |      |
|----|--------------|------|
| 71 | -961.9084103 | 4.24 |
| 81 | -961.9080239 | 2.81 |
| 85 | -961.9072888 | 1.29 |

---

**Figure S61.** Comparison of the calculated ECD spectra for **3** with the experimental spectrum of **3**

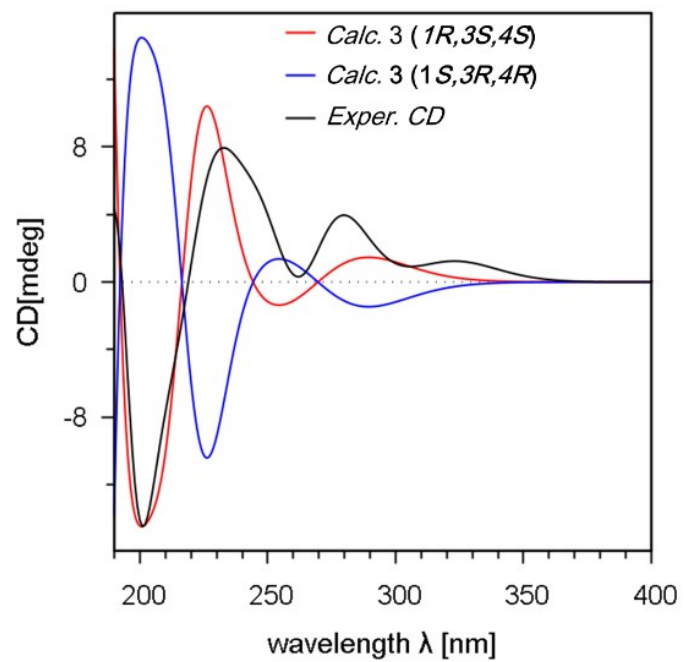

**Table S5.** Energy analysis for conformers of **1** at B3LYP/6-31G(d) level

| <b>conformer</b> | <b>Energy (hartree)</b> | <b>Ratio (%)</b> |
|------------------|-------------------------|------------------|
| 1                | -691.5644337            | 66.82            |
| 2                | -691.5636597            | 29.42            |
| 4                | -691.5610731            | 1.90             |
| 5                | -691.5610583            | 1.87             |
